# Supplementary material for: Synthesis of imidazole-fused nitrogen-bridgehead heterocycles catalysed by lipase and their antifungal and antimicrobial bioactivity
Source: Royal Society of Chemistry journal article supplement (doi:10.1039/d3ra07145f), 2024-01-01

## Supporting Information

### **Synthesis of Imidazole-fused nitrogen-bridgehead heterocycles catalysed by lipase and their antifungal and anti-microbial bioactivity.**

Manjit Singh<sup>a</sup>, Manisha Malviya \*Vijay B. Yadav<sup>b</sup>, Aishwarya Nikhil<sup>c</sup> & Munesh Gupta<sup>c</sup>

<sup>a</sup> Department of Chemistry IIT (BHU) Varanasi

<sup>b</sup>Department of Chemistry University of Allahabad

<sup>c</sup>Department of Microbiology, IMS(BHU) Varanasi

**Email: manisha.apc@itbhu.ac.in**

| LIST OF CONTENTS:                                                              | page no. |
|--------------------------------------------------------------------------------|----------|
| 1. General Information                                                         | 2        |
| 2. Experimental procedure for the synthesis of 2-phenylimidazo[1,2-a] pyridine | 2        |
| 3. Analytical data of products                                                 | 3        |
| 4. References                                                                  | 13       |
| 5. <sup>1</sup> H, <sup>13</sup> C and Mass spectra                            | 14       |

#### **1.) General Information**

All chemicals and solvents were purchased from Sigma Aldrich and used without purification. Melting points were measured on the Stewart melting point apparatus in one side open capillary and are uncorrected. The progress of the reaction was monitored by thin-layer chromatography on a glass plate coated with silica gel G-234 and fluorescent silica gel. A UV lamp and iodine chamber were used to visualize the reaction spot. High-Resolution Mass Spectrometry (HRMS) was performed using a SCIEX X500R QTOF (TOF-MS) system. <sup>1</sup>H and <sup>13</sup>C NMR spectra were recorded on Bruker Avance 500 MHz spectrometer in DMSO d<sub>6</sub> using TMS as internal standard 500 MHz (<sup>1</sup>H) and 126 MHz (<sup>13</sup>C). All chemical shifts were

reported in ppm with reference to the DMSO peak (2.50 for  $^1\text{H}$  and 39.50 for  $^{13}\text{C}$  NMR). All coupling constants are reported in hertz (Hz). Abbreviations are s: singlet, d: doublet, t: triplet, q: quartet, bs: broad singlet, dd: double doublet. All synthesized products were confirmed by using melting point,  $^1\text{H}$  and  $^{13}\text{C}$  NMR, and comparison with the literature reports.

## **2.) General procedure for the synthesis of 2-phenylimidazo[1,2-a] pyridine**

### **2.1 Experimental procedures for the synthesis of 2-phenylimidazo[1,2-a] pyridine**

The mixture of 1.0 mmol 2-bromoacetophenone, 1.0 mmol 2-aminopyridine, 3 ml  $\text{C}_2\text{H}_5\text{OH}$  and 30 mg PPL was introduced to an RB (50 ml), then the mixture was subjected to shaking at 160 rpm with end-over-end rotation at 30 °C for a certain time. The reaction was monitored by TLC (petroleum ether–ethyl acetate ¼ 5: 1, v/v), and 5 ml ethyl acetate was added into the reaction mixture to dissolve any solids if necessary. Then, the mixture was filtered through a paper filter to remove the enzymes, and the solvent was evaporated. The residue was recrystallised with ethanol, yielding the target compounds.  $^1\text{H}$  NMR spectra were recorded on a Bruker Avance 500 spectrometer at 500 MHz in DMSO, using TMS as an internal standard. IR spectra were recorded on a Bruker Equinox-55 spectrophotometer, using KBr discs in the 4000– 400  $\text{cm}^{-1}$  regions. All of the enzymes were purchased from Aldrich and used directly. The enzymatic units of all of the enzymes are described as follows: trypsin from porcine pancreas (2500 units per mg), lipase from porcine pancreas ( $\geq 200$  units per mg), diastase ( $\geq 3.5$  units per mg),  $\alpha$ -amylase from *Aspergillus oryzae* ( $\leq 30$  units per mg),  $\alpha$ -amylase from hog pancreas (10 units per mg), Amano lipase M from *Mucor javanicus* (10 units per mg). All reagents were analytical reagent grade and used directly without further purification.

### **2.2. Procedure for gram-scale synthesis:**

A mixture of 2- bromo acetophenone (2.4 g, 20.0 mmol), 2-amino pyridine ((2.16 g, 24.0 mmol), PPL-Lipase (30 mg.) and  $\text{C}_2\text{H}_5\text{OH}$  (50 ml.) were added in 30, ml RB and steerer continuously, and the progress of the reaction was monitored by TLC. The reaction was monitored by TLC (petroleum ether–ethyl acetate ¼ 5: 1, v/v), and 5 ml ethyl acetate was added into the reaction mixture to dissolve any solids if necessary. Then, the mixture was filtered through a paper filter to remove the enzymes, and the solvent was evaporated. The solid residue was recrystallised with ethanol, yielding the target compounds.  $^1\text{H}$  NMR spectra

were recorded on a Bruker Avance 500 spectrometer at 500 MHz in DMSO, using TMS as an internal standard.

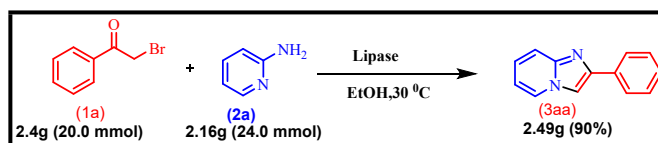

### 3. A) Analytical data of products:

#### [3.1] <sup>1</sup>H and <sup>13</sup>C NMR of the 2-phenylimidazo[1,2-a] pyridine(3aa)<sup>1</sup>

|                                                                                   |                                                                                                                                                                                                                                                                                                                                                                                                                                                                                                                                                                                                                                                                                                                                                                                                           |
|-----------------------------------------------------------------------------------|-----------------------------------------------------------------------------------------------------------------------------------------------------------------------------------------------------------------------------------------------------------------------------------------------------------------------------------------------------------------------------------------------------------------------------------------------------------------------------------------------------------------------------------------------------------------------------------------------------------------------------------------------------------------------------------------------------------------------------------------------------------------------------------------------------------|
| 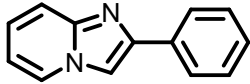 | <p>Purified by recrystallisation using aqueous ethanol; white solid; yield: 960 mg (95%); mp 130- 132°C. <b><sup>1</sup>H NMR</b> (500 MHz, DMSO): δ 8.05 (d, J =7.0 Hz, 1H, arom H), 7.95 (dd, J =8.5 Hz, J =1.5 Hz, 2H, arom H), 7.71 (s, 1H, arom H), 7.59 (d, J =9.0 Hz, 1H, arom H), 7.42 (t, J =7.4 Hz, 2H, arom H), 7.28 (t, J =7.5 Hz, 1H, arom H), 7.14-7.10 (m, 1H, arom H), 6.57 (td, J =7.0 Hz, J =1.0 Hz, 1H, arom H). <b><sup>13</sup>C NMR</b> (126 MHz, CDCl<sub>3</sub>): 144.91, 143.83, 134.89, 127.90, 129.15, 125.21, 126.77, 125.85, 116.68, 111.60, 107.30. IR (KBr, v, cm<sup>-1</sup>): 3433, 3140, 3042, 1945, 1658, 1636, , 1223, 1067, 847, 765 <b>HRMS</b> (ESI): Anal. Calcd. For C<sub>13</sub>H<sub>11</sub>N<sub>2</sub> [M+H]<sup>+</sup> 195.0922; Found: 195.0882</p> |
|-----------------------------------------------------------------------------------|-----------------------------------------------------------------------------------------------------------------------------------------------------------------------------------------------------------------------------------------------------------------------------------------------------------------------------------------------------------------------------------------------------------------------------------------------------------------------------------------------------------------------------------------------------------------------------------------------------------------------------------------------------------------------------------------------------------------------------------------------------------------------------------------------------------|

#### [3.2] <sup>1</sup>H and <sup>13</sup>C NMR of the 2-(p-Tolyl) imidazo [1,2-a] pyridine (3ba)<sup>1</sup>

|                                                                                     |                                                                                                                                                                                                                                                                                                                                                                                                                                                                                                 |
|-------------------------------------------------------------------------------------|-------------------------------------------------------------------------------------------------------------------------------------------------------------------------------------------------------------------------------------------------------------------------------------------------------------------------------------------------------------------------------------------------------------------------------------------------------------------------------------------------|
| 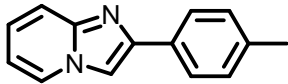 | <p>White solid; yield 193 mg (93%); m.p. 143-144 °C; <b><sup>1</sup>H NMR</b> (500 MHz, DMSO) δ (ppm): 8.93 (d, 1H), 7.84 (d, 2H), 7.77 (s, 1H), 7.43 (d, 1H), 7.37 (dd, 1H), 7.26 (d, 2H), 2.44 (s, 3H); <b><sup>13</sup>C NMR</b> (126 MHz, CDCl<sub>3</sub>) δ (ppm): 167.38, 143.2, 139.3, 133.5, 131.5, 129.4, 128.6, 126.1, 119.5, 106.5, 14.33; <b>HRMS</b> (ESI): calculated for C<sub>14</sub>H<sub>12</sub>N<sub>2</sub> [M<sup>+</sup>] H<sup>+</sup>: 209.1073, found 209.1077.</p> |
|-------------------------------------------------------------------------------------|-------------------------------------------------------------------------------------------------------------------------------------------------------------------------------------------------------------------------------------------------------------------------------------------------------------------------------------------------------------------------------------------------------------------------------------------------------------------------------------------------|

[3.3]  $^1\text{H}$  and  $^{13}\text{C}$  NMR of the 2-(4-methoxyphenyl) imidazo[1,2-a]pyridine (3ca)<sup>2</sup>

|                                                                                   |                                                                                                                                                                                                                                                                                                                                                                                                                                                                                                                               |
|-----------------------------------------------------------------------------------|-------------------------------------------------------------------------------------------------------------------------------------------------------------------------------------------------------------------------------------------------------------------------------------------------------------------------------------------------------------------------------------------------------------------------------------------------------------------------------------------------------------------------------|
| 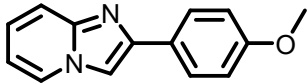 | White solid; yield 210 mg (90%); m.p. 138-139 °C; $^1\text{H}$ NMR (500 MHz, DMSO) $\delta$ (ppm): 8.63 (dd, 1H), 8.05 (d, 2H), 7.98 (s, 1H), 7.62 (d, 1H), 7.17 – 7.14 (m, 1H), 6.96 (d, 2H), 6.74 (t, 1H), 3.84 (s, 3H); $^{13}\text{C}$ NMR (126 MHz, $\text{CDCl}_3$ ) $\delta$ (ppm): 161.32, 144.84, 128.74, 126.13, 125.5, 124.5, 123.6, 117.4, 114.2, 110.4, 107.3, 56.4. HRMS (ESI): calculated for $\text{C}_{14}\text{H}_{12}\text{N}_2\text{O}$ [ $\text{M}^+\text{H}$ ] <sup>+</sup> : 225.1022, found 225.1025. |
|-----------------------------------------------------------------------------------|-------------------------------------------------------------------------------------------------------------------------------------------------------------------------------------------------------------------------------------------------------------------------------------------------------------------------------------------------------------------------------------------------------------------------------------------------------------------------------------------------------------------------------|

[3.4]  $^1\text{H}$  and  $^{13}\text{C}$  NMR of the 2-(4-nitrophenyl) imidazo[1,2-a]pyridine (3da)<sup>1</sup>

|                                                                                     |                                                                                                                                                                                                                                                                                                                                                                                                                                                                                                                       |
|-------------------------------------------------------------------------------------|-----------------------------------------------------------------------------------------------------------------------------------------------------------------------------------------------------------------------------------------------------------------------------------------------------------------------------------------------------------------------------------------------------------------------------------------------------------------------------------------------------------------------|
| 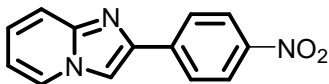 | Yellow solid; yield 227 mg (70%); m.p. 202-203 °C; $^1\text{H}$ NMR (500 MHz, DMSO) $\delta$ (ppm): 8.54 – 8.44 (m, 1H), 7.93 (d, 1H), 7.92 (dd, 2H), 7.64 (s, 1H), 7.63 (d, 1H), 7.25 (t, 1H), 7.21 (d, 1H), 6.91 (t, 1H); $^{13}\text{C}$ NMR (126 MHz, $\text{CDCl}_3$ ) $\delta$ (ppm): 145.37, 143.67, 133.70, 132.12, 128.03, 127.44, 125.68, 121.15, 117.16, 112.91, 109.98. HRMS m/z (ESI): calcd. for [ $\text{C}_{13}\text{H}_9\text{N}_3\text{O}_2$ ] <sup>+</sup> $\text{H}^+$ : 240.0768 Found: 240.0769 |
|-------------------------------------------------------------------------------------|-----------------------------------------------------------------------------------------------------------------------------------------------------------------------------------------------------------------------------------------------------------------------------------------------------------------------------------------------------------------------------------------------------------------------------------------------------------------------------------------------------------------------|

[3.5]  $^1\text{H}$  and  $^{13}\text{C}$  NMR of the 4-(Imidazo[1,2-a]pyridin-2-yl)phenol (3ea)<sup>4</sup>:

|                                                                                     |                                                                                                                                                                                                                                                                                                                                                                                                                                                                   |
|-------------------------------------------------------------------------------------|-------------------------------------------------------------------------------------------------------------------------------------------------------------------------------------------------------------------------------------------------------------------------------------------------------------------------------------------------------------------------------------------------------------------------------------------------------------------|
| 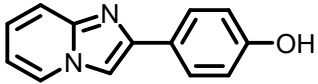 | Brown solid; yield 185 mg (75%); m.p. 230-231 °C; $^1\text{H}$ NMR (500 MHz, DMSO) $\delta$ (ppm): 8.80 (s, 1H), 8.45 (d, 1H), 8.02 (s, 1H), 7.98 (d, 2H), 7.96 (d, 1H), 7.84 – 7.79 (m, 1H), 7.26 (d, 2H), 6.06 (s, 1H); $^{13}\text{C}$ NMR (126 MHz, $\text{CDCl}_3$ ) $\delta$ (ppm): 156.18, 143.95, 128.01, 127.37, 126.6, 125.49, 117.09, 116.13, 115.96, 112.78, 109.41, 107.46 HRMS (ESI): calculated for $\text{C}_{13}\text{H}_{10}\text{N}_2\text{O}$ |
|-------------------------------------------------------------------------------------|-------------------------------------------------------------------------------------------------------------------------------------------------------------------------------------------------------------------------------------------------------------------------------------------------------------------------------------------------------------------------------------------------------------------------------------------------------------------|

|  |                                                              |
|--|--------------------------------------------------------------|
|  | [M <sup>+</sup> ] H <sup>+</sup> : 211.0866, found 211.0870. |
|--|--------------------------------------------------------------|

**[3.6] <sup>1</sup>H and <sup>13</sup>C NMR of the 2-(4-Bromophenyl) imidazo[1,2-a] pyridine (3fa)<sup>5</sup>:**

|                                                                                    |                                                                                                                                                                                                                                                                                                                                                                                                                                                                                                                                                                                                                                 |
|------------------------------------------------------------------------------------|---------------------------------------------------------------------------------------------------------------------------------------------------------------------------------------------------------------------------------------------------------------------------------------------------------------------------------------------------------------------------------------------------------------------------------------------------------------------------------------------------------------------------------------------------------------------------------------------------------------------------------|
| 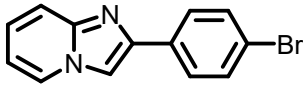 | <p>Yellow solid; yield 211 mg (90%); m.p. 206-207 °C; <b><sup>1</sup>H NMR</b> (500 MHz, DMSO) δ (ppm): 8.53 (d, 1H), 8.44 (d, 2H), 8.00 (s, 1H), 7.98 (d, 1H), 7.41 (d, 2H), 7.59-7.26 (dd, 1H), 6.91 (t, 1H); <b><sup>13</sup>C NMR</b> (126 MHz, CDCl<sub>3</sub>) δ (ppm): 145.78, 143.8, 133.24, 132.18, 129.05, 126.24, 125.59, 117.24, 116.7, 113.7, 109.96; <b>HRMS (ESI)</b>: calculated for C<sub>13</sub>H<sub>9</sub>BrN<sub>2</sub> [M<sup>+</sup>] H<sup>+</sup>: 273.0027 (for <sup>79</sup>Br) and 275.0007 (for <sup>81</sup>Br), found 273.0029 (for <sup>79</sup>Br) and 275.0009 (for <sup>81</sup>Br).</p> |
|------------------------------------------------------------------------------------|---------------------------------------------------------------------------------------------------------------------------------------------------------------------------------------------------------------------------------------------------------------------------------------------------------------------------------------------------------------------------------------------------------------------------------------------------------------------------------------------------------------------------------------------------------------------------------------------------------------------------------|

**[3.7] <sup>1</sup>H and <sup>13</sup>C NMR of the 2-(4-Fluorophenyl) imidazo[1,2-a] pyridine (3ga)<sup>1</sup>:**

|                                                                                     |                                                                                                                                                                                                                                                                                                                                                                                                                                                                                                                                                                                                                        |
|-------------------------------------------------------------------------------------|------------------------------------------------------------------------------------------------------------------------------------------------------------------------------------------------------------------------------------------------------------------------------------------------------------------------------------------------------------------------------------------------------------------------------------------------------------------------------------------------------------------------------------------------------------------------------------------------------------------------|
| 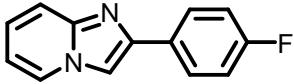 | <p>Pale yellow solid; yield 199 mg (65%); m.p. 164-165 °C; <b><sup>1</sup>H NMR</b> (500 MHz, DMSO) δ (ppm): 8.52 (d, 1H), 7.99 – 7.57 (m, 2H), 7.28 (s, 1H), 7.26 (d, 1H), 7.24 (t, 1H), 7.13 – 7.08 (m, 2H), 6.93 (t, 1H); <b><sup>13</sup>C NMR</b> (126 MHz, CDCl<sub>3</sub>) δ (ppm): 163.06, 147.18, 145.25(J=97Hz.),129.84(J=3.2Hz),128.96,127.09(J=8.06Hz),125.68, 125.47, 116.74 116.132,(J=21.5Hz),111.78, 107.81.<b><sup>19</sup>F NMR</b> (471 MHz, DMSO)δ-108.75.<b>HRMS (ESI)</b>: calculated for C<sub>13</sub>H<sub>9</sub>FN<sub>2</sub> [M<sup>+</sup>]H<sup>+</sup>: 213.0823, found 213.0815.</p> |
|-------------------------------------------------------------------------------------|------------------------------------------------------------------------------------------------------------------------------------------------------------------------------------------------------------------------------------------------------------------------------------------------------------------------------------------------------------------------------------------------------------------------------------------------------------------------------------------------------------------------------------------------------------------------------------------------------------------------|

**[3.8] <sup>1</sup>H and <sup>13</sup>C NMR of the 4-(imidazo[1,2-a]pyridine-2-yl)benzotrile(3ha)<sup>7</sup>:**

|                                                                                   |                                                                                                                                                                                                                                                                                                                                                                                                                                                                                                                                        |
|-----------------------------------------------------------------------------------|----------------------------------------------------------------------------------------------------------------------------------------------------------------------------------------------------------------------------------------------------------------------------------------------------------------------------------------------------------------------------------------------------------------------------------------------------------------------------------------------------------------------------------------|
| 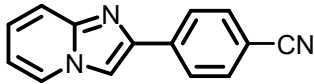 | <p>Colourless solid; yield 187 mg (65%); m.p. 200-201 °C; <b><sup>1</sup>H NMR</b> (500 MHz, DMSO) δ (ppm): 12.73 (s, 1H), 8.52 (d, 1H), 8.44 (s, 1H), 7.94 (d, 2H), 7.92-7.91 (t, 2H), 7.64-7.63 (dd, 1H), 7.26 – 6.911(m, 2H); <b><sup>13</sup>C NMR</b> (126 MHz, CDCl<sub>3</sub>) δ (ppm):145.37, 143.67, 133.70, 132.02, 128.03, 127.53, 127.44, 125.68, 121.15, 117.16, 112.91, 109.98. <b>HRMS (ESI)</b>: calculated for C<sub>14</sub>H<sub>9</sub>N<sub>3</sub> [M<sup>+</sup>] H<sup>+</sup>: 220.0869, found 220.0869.</p> |
|-----------------------------------------------------------------------------------|----------------------------------------------------------------------------------------------------------------------------------------------------------------------------------------------------------------------------------------------------------------------------------------------------------------------------------------------------------------------------------------------------------------------------------------------------------------------------------------------------------------------------------------|

**[3.9] <sup>1</sup>H and <sup>13</sup>C NMR of the 2-(4-chlorophenyl) imidazo[1,2-a] pyridine (3ia)<sup>1</sup>:**

|                                                                                    |                                                                                                                                                                                                                                                                                                                                                                                                                                                                                                                                              |
|------------------------------------------------------------------------------------|----------------------------------------------------------------------------------------------------------------------------------------------------------------------------------------------------------------------------------------------------------------------------------------------------------------------------------------------------------------------------------------------------------------------------------------------------------------------------------------------------------------------------------------------|
| 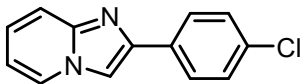 | <p>Yellow solid; yield 227 mg (85%); m.p. 202-203 °C; <b><sup>1</sup>H NMR</b> (500 MHz, DMSO) δ (ppm): 8.53 – 8.44 (m, 1H), 8.00 (d, 1H), 7.98 (dd, 2H), 7.53 (s, 1H), 7.49 (d, 1H), 7.27 (t, 1H), 7.22 (d, 1H), 6.91 (t, 1H); <b><sup>13</sup>C NMR</b> (126 MHz, CDCl<sub>3</sub>) δ (ppm): 145.37, 145.0, 143.64, 133.55, 129.21, 127.71, 127.43, 125.5, 123.66, 117.16, 112.96, 114.1, 109.96 <b>HRMS (ESI)</b>: calculated for C<sub>13</sub>H<sub>9</sub>ClN<sub>2</sub> [M<sup>+</sup>] H<sup>+</sup>: 229.0527, found 229.0531.</p> |
|------------------------------------------------------------------------------------|----------------------------------------------------------------------------------------------------------------------------------------------------------------------------------------------------------------------------------------------------------------------------------------------------------------------------------------------------------------------------------------------------------------------------------------------------------------------------------------------------------------------------------------------|

**[3.10] <sup>1</sup>H and <sup>13</sup>C NMR of the 2-(Pyridin-2-yl)imidazo[1,2-a]pyridine (3ja)<sup>2</sup>:**

|                                                                                     |                                                                                                                                                                                                                                                                                                                                                                                                                                                                                                                |
|-------------------------------------------------------------------------------------|----------------------------------------------------------------------------------------------------------------------------------------------------------------------------------------------------------------------------------------------------------------------------------------------------------------------------------------------------------------------------------------------------------------------------------------------------------------------------------------------------------------|
| 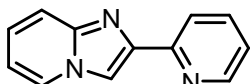 | <p>Brown solid; yield 166 mg (80%); m.p. 240-241 °C; <b><sup>1</sup>H NMR</b> (500 MHz, DMSO) δ (ppm): 8.64 – 8.63 (m, 2H), 8.24 (s, 1H), 8.23 (dd, 1H), 7.86 (d, 1H), 7.84 (d, 1H), 7.71 – 7.57 (m, 2H), 6.93 (d, 1H); <b><sup>13</sup>C NMR</b> (126MHz, DMSO) δ (ppm): 153.38, 151.02, 147.86, 141.19, 139.60, 127.09, 125.68, 123.22, 116.74, 116.71, 111.00, 100.86. <b>HRMS (ESI)</b>: Anal. Calcd. For C<sub>12</sub>H<sub>9</sub>N<sub>3</sub> [M<sup>+</sup>] H<sup>+</sup> 195.08; Found: 196.08</p> |
|-------------------------------------------------------------------------------------|----------------------------------------------------------------------------------------------------------------------------------------------------------------------------------------------------------------------------------------------------------------------------------------------------------------------------------------------------------------------------------------------------------------------------------------------------------------------------------------------------------------|

**[3.11]  $^1\text{H}$  and  $^{13}\text{C}$  NMR of the 2-(Thiophen-2-yl)imidazo[1,2-a]pyridine (3ka)<sup>7</sup>:**

|                                                                                   |                                                                                                                                                                                                                                                                                                                                                                                                                                                                                                                                                                                               |
|-----------------------------------------------------------------------------------|-----------------------------------------------------------------------------------------------------------------------------------------------------------------------------------------------------------------------------------------------------------------------------------------------------------------------------------------------------------------------------------------------------------------------------------------------------------------------------------------------------------------------------------------------------------------------------------------------|
| 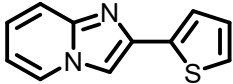 | Yellowish white solid; yield 184 mg (60%); m.p. 135-136 °C; <b><math>^1\text{H}</math> NMR</b> (500 MHz, DMSO) $\delta$ (ppm): 8.51 (d, 1H), 8.76 (s, 1H), 8.28 (d, 1H), 7.25 – 7.14 (m, 1H), 7.61 – 7.56 (m, 1H), 7.54 – 7.51 (m, 1H), 7.25 – 7.14 (m, 1H), 6.90 (t, 1H); <b><math>^{13}\text{C}</math> NMR</b> (126 MHz, $\text{CDCl}_3$ ) $\delta$ (ppm): 145.04, 140.23, 138.26, 128.45, 127.26, 125.92, 125.59, 124.06, 116.79, 112.88, 108.67. <b>HRMS (ESI)</b> : calculated for $\text{C}_{11}\text{H}_8\text{N}_2\text{O}$ [ $\text{M}^+$ ] $\text{H}^+$ : 185.0709, found 185.0695. |
|-----------------------------------------------------------------------------------|-----------------------------------------------------------------------------------------------------------------------------------------------------------------------------------------------------------------------------------------------------------------------------------------------------------------------------------------------------------------------------------------------------------------------------------------------------------------------------------------------------------------------------------------------------------------------------------------------|

**[3.12]  $^1\text{H}$  and  $^{13}\text{C}$  NMR of the 2-(Naphthalen-1-yl)imidazo[1,2-a]pyridine (3la)<sup>2,5</sup>**

|                                                                                     |                                                                                                                                                                                                                                                                                                                                                                                                                                                                                                                                                                                                    |
|-------------------------------------------------------------------------------------|----------------------------------------------------------------------------------------------------------------------------------------------------------------------------------------------------------------------------------------------------------------------------------------------------------------------------------------------------------------------------------------------------------------------------------------------------------------------------------------------------------------------------------------------------------------------------------------------------|
| 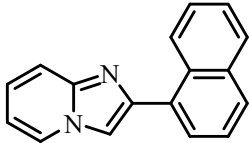 | Yellowish liquid; yield 227 mg (82%); <b><math>^1\text{H}</math> NMR</b> (500 MHz, ) $\delta$ (ppm): 8.62 – 8.55 (m, 1H), 8.16 (d, 1H), 7.91 – 7.86 (m, 2H), 7.82 (d, 2H), 7.70 (d, 1H), 7.57 – 7.48 (m, 3H), 7.22 – 7.17 (m, 1H), 6.80 (s, 1H); <b><math>^{13}\text{C}</math> NMR</b> (126 MHz, DMSO) $\delta$ (ppm): 146.48, 144.34, 138.01, 130.87, 132.63, 127.59, 129.47, 126.83, 125.55, 127.06, 124.89, 126.66, 124.52, 123.71, 116.85, 116.74, 111.00. <b>HRMS (ESI)</b> : calculated for $\text{C}_{17}\text{H}_{12}\text{N}_2$ [ $\text{M}^+$ ] $\text{H}^+$ : 245.1073, found 245.1076. |
|-------------------------------------------------------------------------------------|----------------------------------------------------------------------------------------------------------------------------------------------------------------------------------------------------------------------------------------------------------------------------------------------------------------------------------------------------------------------------------------------------------------------------------------------------------------------------------------------------------------------------------------------------------------------------------------------------|

**[3.13]  $^1\text{H}$  and  $^{13}\text{C}$  NMR of the 8-Methyl-2-phenylimidazo[1,2-a]pyridine (3ab)<sup>1</sup>:**

|                                                                                     |                                                                                                                                                                                                                                                                                                                                                                                                                                                                                                                                                              |
|-------------------------------------------------------------------------------------|--------------------------------------------------------------------------------------------------------------------------------------------------------------------------------------------------------------------------------------------------------------------------------------------------------------------------------------------------------------------------------------------------------------------------------------------------------------------------------------------------------------------------------------------------------------|
| 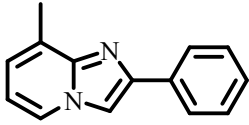 | Pale yellow solid; yield 189 mg (94%); m.p. 119-120 °C; <b><math>^1\text{H}</math> NMR</b> (500 MHz, $\text{CDCl}_3$ ) $\delta$ (ppm): 8.69 (t, 1H), 7.98 (d, 2H), 7.62 (s, 1H), 7.82 (dd, 2H), 7.33 – 7.14 (m, 1H), 6.84 (d, 1H), 3.85 (t, 1H), 2.65 (s, 3H); <b><math>^{13}\text{C}</math> NMR</b> (126 MHz, DMSO) $\delta$ (ppm): 161.06, 143.38, 142.69, 131.69, 128.67, 126.66, 123.47, 122.89, 117.4, 55.93, 19.2. <b>HRMS (ESI)</b> : calculated for $\text{C}_{14}\text{H}_{12}\text{N}_2$ [ $\text{M}^+$ ] $\text{H}^+$ : 209.1073, found 209.1074. |
|-------------------------------------------------------------------------------------|--------------------------------------------------------------------------------------------------------------------------------------------------------------------------------------------------------------------------------------------------------------------------------------------------------------------------------------------------------------------------------------------------------------------------------------------------------------------------------------------------------------------------------------------------------------|

**[3.14] <sup>1</sup>H and <sup>13</sup>C NMR of the 2-(4-Methoxyphenyl)-8-methylimidazo[1,2-a]pyridine (3cb)<sup>2</sup>:**

|                                                                                   |                                                                                                                                                                                                                                                                                                                                                                                                                                                                                                                                       |
|-----------------------------------------------------------------------------------|---------------------------------------------------------------------------------------------------------------------------------------------------------------------------------------------------------------------------------------------------------------------------------------------------------------------------------------------------------------------------------------------------------------------------------------------------------------------------------------------------------------------------------------|
| 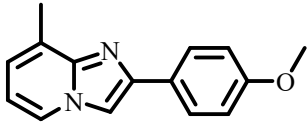 | <p>Pale yellow solid; yield 209 mg (88%); m.p. 132-133 °C; <b><sup>1</sup>H NMR</b> (500 MHz, DMSO) δ (ppm): 7.94 (d, 1H), 7.87 (d, 2H), 7.72 (s, 1H), 6.96 (d, 2H), 6.91 (d, 1H), 6.65 (t, 1H), 3.83 (s, 3H), 2.64 (s, 3H); <b><sup>13</sup>C NMR</b> (126 MHz, CDCl<sub>3</sub>) δ (ppm): 160.5, 147.2, 144.2, 126.5, 126.4, 125.9, 122.4, 124.2, 115.1, 113.2, 106.8, 54.4, 16.2.</p> <p><b>HRMS (ESI):</b> calculated for C<sub>15</sub>H<sub>14</sub>N<sub>2</sub>O [M<sup>+</sup>] H<sup>+</sup>: 239.1179, found 239.1173.</p> |
|-----------------------------------------------------------------------------------|---------------------------------------------------------------------------------------------------------------------------------------------------------------------------------------------------------------------------------------------------------------------------------------------------------------------------------------------------------------------------------------------------------------------------------------------------------------------------------------------------------------------------------------|

**[3.15] <sup>1</sup>H and <sup>13</sup>C NMR of 8-Methyl-2-(3-nitrophenyl)imidazo[1,2-a]pyridine (3db)<sup>5</sup>:**

|                                                                                     |                                                                                                                                                                                                                                                                                                                                                                                                                                                                                                                                                                                                  |
|-------------------------------------------------------------------------------------|--------------------------------------------------------------------------------------------------------------------------------------------------------------------------------------------------------------------------------------------------------------------------------------------------------------------------------------------------------------------------------------------------------------------------------------------------------------------------------------------------------------------------------------------------------------------------------------------------|
| 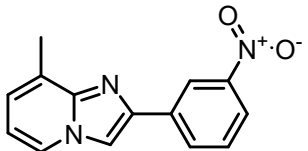 | <p>Yellow solid; yield 233 mg (75%); m.p. 168-169 °C; <b><sup>1</sup>H NMR</b> (500 MHz, DMSO) δ (ppm): 8.63 (m, 1H), 8.25 (dd, 1H), 8.14 – 8.10 (m, 1H), 7.97 (d, 1H), 7.84 (s, 1H), 7.68 (t, 1H), 7.05 (dd, 1H), 7.84 (t, 1H), 2.64 (s, 3H); <b><sup>13</sup>C NMR</b> (126 MHz, CDCl<sub>3</sub>) δ (ppm): 148.44, 141.24, 140.73, 140.1, 134.76, 132.79, 129.69, 128.10, 125.92, 124.49, 123.23, 123.18, 108.92, 108.46, 19.11</p> <p><b>HRMS (ESI):</b> Anal. Calcd. For C<sub>14</sub>H<sub>11</sub>N<sub>3</sub>O<sub>3</sub> [M<sup>+</sup>] H<sup>+</sup> 253.0922; Found: 254.0882</p> |
|-------------------------------------------------------------------------------------|--------------------------------------------------------------------------------------------------------------------------------------------------------------------------------------------------------------------------------------------------------------------------------------------------------------------------------------------------------------------------------------------------------------------------------------------------------------------------------------------------------------------------------------------------------------------------------------------------|

**[3.16] <sup>1</sup>H and <sup>13</sup>C NMR of the 2-(4-Chlorophenyl)-8-methylimidazo[1,2-a]pyridine (3eb)<sup>8</sup>:**

|                                                                                     |                                                                                                                                                                                                                                                                                                                                                                                                                                                                                                               |
|-------------------------------------------------------------------------------------|---------------------------------------------------------------------------------------------------------------------------------------------------------------------------------------------------------------------------------------------------------------------------------------------------------------------------------------------------------------------------------------------------------------------------------------------------------------------------------------------------------------|
| 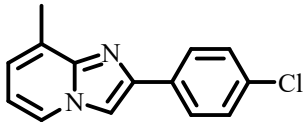 | <p>White solid; yield 226 mg (78%); m.p. 119-120 °C; <b><sup>1</sup>H NMR</b> (500 MHz, DMSO) δ (ppm): 8.44 (d, 1H), 8.37 (d, 2H), 8.01 (s, 1H), 7.99 (d, 2H), 7.06 (d, 1H), 6.83 (t, 1H), 2.53 (s, 3H); <b><sup>13</sup>C NMR</b> (126 MHz, CDCl<sub>3</sub>) δ (ppm): 145.86, 143.01, 133.47, 132.43, 129.35, 127.70, 126.5, 125.6, 124.5, 123.6, 110.7, 17.09. <b>HRMS (ESI):</b> Anal. Calcd. For C<sub>14</sub>H<sub>11</sub>ClN<sub>2</sub> [M<sup>+</sup>] H<sup>+</sup> 242.0922; Found: 242.0621</p> |
|-------------------------------------------------------------------------------------|---------------------------------------------------------------------------------------------------------------------------------------------------------------------------------------------------------------------------------------------------------------------------------------------------------------------------------------------------------------------------------------------------------------------------------------------------------------------------------------------------------------|



[3.17]  $^1\text{H}$  and  $^{13}\text{C}$  NMR of the 2-(4-Bromophenyl)-8-methylimidazo[1,2-a]pyridine (3fb)<sup>9</sup>:

|                                                                                   |                                                                                                                                                                                                                                                                                                                                                                                                                                                                                                                                                                                                                                                                                                                                                               |
|-----------------------------------------------------------------------------------|---------------------------------------------------------------------------------------------------------------------------------------------------------------------------------------------------------------------------------------------------------------------------------------------------------------------------------------------------------------------------------------------------------------------------------------------------------------------------------------------------------------------------------------------------------------------------------------------------------------------------------------------------------------------------------------------------------------------------------------------------------------|
| 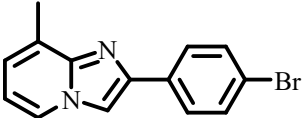 | <p>Yellow solid; yield 261 mg (91%); m.p. 131-132°C; <math>^1\text{H}</math> NMR (500 MHz, DMSO) <math>\delta</math> (ppm): 8.43 (d, 1H), 7.86 – 7.81 (m, 2H), 7.78 (s, 1H), 7.54 (d, 2H), 6.95 (d, 1H), 6.72 – 6.63 (m, 1H), 2.64 (s, 3H); <math>^{13}\text{C}</math> NMR (126 MHz, <math>\text{CDCl}_3</math>) <math>\delta</math> (ppm): 155.06, 146.25, 142.61, 137.13, 133.51, 132.40, 128.01, 121.00, 112.64, 110.40, 17.04 <b>HRMS (ESI)</b>: calculated for <math>\text{C}_{14}\text{H}_{11}\text{BrN}_2</math> [<math>\text{M}^+ \text{H}^+</math>]: 287.0178 (for <math>^{79}\text{Br}</math>) and 289.0163 (for <math>^{81}\text{Br}</math>), found 287.0166 (for <math>^{79}\text{Br}</math>) and 289.0170 (for <math>^{81}\text{Br}</math>).</p> |
|-----------------------------------------------------------------------------------|---------------------------------------------------------------------------------------------------------------------------------------------------------------------------------------------------------------------------------------------------------------------------------------------------------------------------------------------------------------------------------------------------------------------------------------------------------------------------------------------------------------------------------------------------------------------------------------------------------------------------------------------------------------------------------------------------------------------------------------------------------------|

[3.18]  $^1\text{H}$  &  $^{13}\text{C}$  NMR of the 2-(4-Fluorophenyl)-8-methylimidazo[1,2-a]pyridine (3gb)<sup>1</sup>:

|                                                                                     |                                                                                                                                                                                                                                                                                                                                                                                                                                                                                                                                                                                                                                                                                                                                                                                   |
|-------------------------------------------------------------------------------------|-----------------------------------------------------------------------------------------------------------------------------------------------------------------------------------------------------------------------------------------------------------------------------------------------------------------------------------------------------------------------------------------------------------------------------------------------------------------------------------------------------------------------------------------------------------------------------------------------------------------------------------------------------------------------------------------------------------------------------------------------------------------------------------|
| 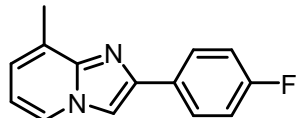 | <p>White solid; yield 199 mg (75%); m.p. 128-129 °C; <math>^1\text{H}</math> NMR (500 MHz, DMSO) <math>\delta</math> (ppm): 8.14 (s, 1H), 7.70 (dd, 2H), 7.58 (s, 1H), 7.16 – 7.04 (m, 2H), 6.97 – 6.93 (m, 1H), 6.84 (t, 1H), 2.59 (s, 3H); <math>^{13}\text{C}</math> NMR (126 MHz, <math>\text{CDCl}_3</math>) <math>\delta</math> (ppm): 163.06, 141.37, 141.24(d, <math>J=16.3\text{Hz}</math>), 129.84, 128.96(d, <math>J=15.1\text{Hz}</math>), 128.10, 125.92, 124.49, 116.32, 108.46, 108.45, (s<math>J=1.26\text{Hz}</math>) 19.11. <math>^{19}\text{F}</math> NMR (471 MHz, DMSO) <math>\delta</math> -121.66. <b>HRMS (ESI)</b>: calculated for <math>\text{C}_{14}\text{H}_{11}\text{FN}_2</math> [<math>\text{M}^+ \text{H}^+</math>]: 226.0178 found 227.0166.</p> |
|-------------------------------------------------------------------------------------|-----------------------------------------------------------------------------------------------------------------------------------------------------------------------------------------------------------------------------------------------------------------------------------------------------------------------------------------------------------------------------------------------------------------------------------------------------------------------------------------------------------------------------------------------------------------------------------------------------------------------------------------------------------------------------------------------------------------------------------------------------------------------------------|

[3.19] ]  $^1\text{H}$  and  $^{13}\text{C}$  NMR of the 2-(8-Methylimidazo[1,2-a]pyridin-2-yl) phenol (3hb)<sup>3</sup>:

|                                                                                   |                                                                                                                                                                                                                                                                                                                                                                                                                                                                                                                                                                                                                                                       |
|-----------------------------------------------------------------------------------|-------------------------------------------------------------------------------------------------------------------------------------------------------------------------------------------------------------------------------------------------------------------------------------------------------------------------------------------------------------------------------------------------------------------------------------------------------------------------------------------------------------------------------------------------------------------------------------------------------------------------------------------------------|
| 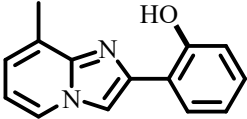 | <p>White solid; yield 195 mg (87%); <math>^1\text{H}</math> NMR (500 MHz, DMSO) <math>\delta</math> (ppm): 12.94 (s, 1H), 8.47 (s, 1H), 8.46 (dd, 1H), 7.87 (d, 1H), 7.25 – 7.18 (m, 1H), 6.94 – 6.92 (m, 2H), 6.90 (t, 1H), 6.89 (d, 1H), 2.50 (s, 3H); <math>^{13}\text{C}</math> NMR (126 MHz, <math>\text{CDCl}_3</math>) <math>\delta</math> (ppm): 156.67, 143.80, 143.08, 129.55, 126.88, 125.71, 125.09, 124.86, 118.52, 117.49, 117.24, 113.49, 110.01, 16.81. <b>HRMS</b> (ESI): Anal. Calcd. For <math>\text{C}_{14}\text{H}_{12}\text{N}_2\text{O}</math> [<math>\text{M}^+</math>] <math>\text{H}^+</math> 224.0917; Found: 225.0100</p> |
|-----------------------------------------------------------------------------------|-------------------------------------------------------------------------------------------------------------------------------------------------------------------------------------------------------------------------------------------------------------------------------------------------------------------------------------------------------------------------------------------------------------------------------------------------------------------------------------------------------------------------------------------------------------------------------------------------------------------------------------------------------|

[3.20] ]  $^1\text{H}$  and  $^{13}\text{C}$  NMR of the 4-(8-Methylimidazo[1,2-a]pyridin-2-yl)phenol (3ib)<sup>7</sup>:

|                                                                                     |                                                                                                                                                                                                                                                                                                                                                                                                                                                                                                                                                                                                                         |
|-------------------------------------------------------------------------------------|-------------------------------------------------------------------------------------------------------------------------------------------------------------------------------------------------------------------------------------------------------------------------------------------------------------------------------------------------------------------------------------------------------------------------------------------------------------------------------------------------------------------------------------------------------------------------------------------------------------------------|
| 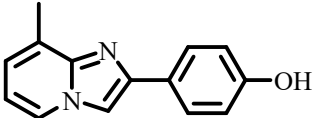 | <p>Brown solid; yield 199 mg (89%); <math>^1\text{H}</math> NMR (500 MHz, DMSO) <math>\delta</math> (ppm): 10.51 (s, 1H), 8.39 (s, 1H), 8.08 (dd, 2H), 7.96 (s, 1H), 7.41 (s, 1H), 7.81 – 7.02 (m, 3H), 6.91 – 6.91 (m, 1H), 6.83 (d, 1H), 6.76 – 6.71 (m, 1H), 2.60 (s, 3H); <math>^{13}\text{C}</math> NMR (126 MHz, DMSO) <math>\delta</math> (ppm): 157.99, 141.77, 141.24, 128.43, 128.10, 125.92, 125.07, 124.49, 116.47, 108.46, 19.11. <b>HRMS</b> (ESI): Anal. Calcd. For <math>\text{C}_8\text{H}_8\text{N}_2\text{O}</math> [<math>\text{M}^+</math>] <math>\text{H}^+</math> 148.0617; Found: 148.0701.</p> |
|-------------------------------------------------------------------------------------|-------------------------------------------------------------------------------------------------------------------------------------------------------------------------------------------------------------------------------------------------------------------------------------------------------------------------------------------------------------------------------------------------------------------------------------------------------------------------------------------------------------------------------------------------------------------------------------------------------------------------|

[3.21]  $^1\text{H}$  &  $^{13}\text{C}$  NMR of the 6-Chloro-2-phenylimidazo[1,2-a]pyridine (3ac):<sup>5</sup>

|                                                                                   |                                                                                                                                                                                                                                                                                                                                                                                                                                                                                         |
|-----------------------------------------------------------------------------------|-----------------------------------------------------------------------------------------------------------------------------------------------------------------------------------------------------------------------------------------------------------------------------------------------------------------------------------------------------------------------------------------------------------------------------------------------------------------------------------------|
| 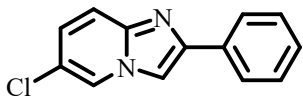 | White solid; yield 213 mg (93%); m.p. 207-208 °C; $^1\text{H}$ NMR (500 MHz, DMSO) $\delta$ (ppm): 8.28 (d, 1H), 7.83 (d, 2H), 7.66 (s, 1H), 7.62 (d, 1H), 7.45 (t, 2H), 7.39 (d, 1H), 7.32 (dd, 1H); $^{13}\text{C}$ NMR (126 MHz, $\text{CDCl}_3$ ) $\delta$ (ppm): 147.17, 145.57, 132.27, 132.26, 129.78, 128.03, 127.06, 126.65, 115.91, 109.0, 107.53. HRMS (ESI): calculated for $\text{C}_{13}\text{H}_9\text{ClN}_2$ [ $\text{M}^+$ ] $\text{H}^+$ : 229.0527, found 229.0515. |
|-----------------------------------------------------------------------------------|-----------------------------------------------------------------------------------------------------------------------------------------------------------------------------------------------------------------------------------------------------------------------------------------------------------------------------------------------------------------------------------------------------------------------------------------------------------------------------------------|

[3.22]  $^1\text{H}$   $^{13}\text{C}$  NMR of the 2-(4-Bromophenyl)-6-chloroimidazo[1,2-a]pyridine (3fc):<sup>2</sup>

|                                                                                    |                                                                                                                                                                                                                                                                                                                                                                                                                                                                                                                                      |
|------------------------------------------------------------------------------------|--------------------------------------------------------------------------------------------------------------------------------------------------------------------------------------------------------------------------------------------------------------------------------------------------------------------------------------------------------------------------------------------------------------------------------------------------------------------------------------------------------------------------------------|
| 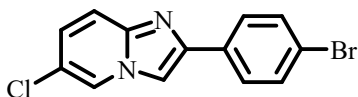 | Yellow solid; yield 277 mg (90%); m.p. 199-200 °C; $^1\text{H}$ NMR (500 MHz, DMSO) $\delta$ (ppm): 8.27 (dd, 1H), 7.82 – 7.65 (m, 3H), 7.60 (d, 3H), 7.51-7.39 (dd, 1H); $^{13}\text{C}$ NMR (126 MHz, $\text{CDCl}_3$ ) $\delta$ (ppm): 147.17, 145.57, 132.44, 131.25, 129.78, 128.22, 129.03, 123.88, 115.91, 109.47, 107.53. HRMS (ESI): calculated for $\text{C}_{13}\text{H}_8\text{BrClN}_2$ [ $\text{M}^+$ ] $\text{H}^+$ : 306.9632 (for 79Br) and 308.9617 (for 81Br), found 306.9624 (for 79Br) and 308.9605 (for 81Br). |
|------------------------------------------------------------------------------------|--------------------------------------------------------------------------------------------------------------------------------------------------------------------------------------------------------------------------------------------------------------------------------------------------------------------------------------------------------------------------------------------------------------------------------------------------------------------------------------------------------------------------------------|

[3.23] [3.21]  $^1\text{H}$  &  $^{13}\text{C}$  NMR of the 6-Chloro-2-(p-tolyl)imidazo[1,2-a]pyridine (3bc)<sup>7</sup>:

|                                                                                     |                                                                                                                                                                                                                                                                                                                                                                                                                                                                                                      |
|-------------------------------------------------------------------------------------|------------------------------------------------------------------------------------------------------------------------------------------------------------------------------------------------------------------------------------------------------------------------------------------------------------------------------------------------------------------------------------------------------------------------------------------------------------------------------------------------------|
| 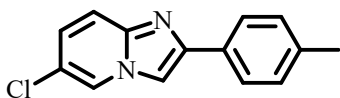 | Pale yellow solid; yield 228 mg (90%); m.p. 125-126 °C; $^1\text{H}$ NMR (500 MHz, DMSO) $\delta$ (ppm): 8.27 (d, 1H), 7.82 (d, 2H), 7.66 (s, 1H), 7.57 (d, 1H), 7.51 (d, 2H), 7.39 (d, 1H), 2.33 (s, 3H); $^{13}\text{C}$ NMR (126 MHz, $\text{CDCl}_3$ ) $\delta$ (ppm): 147.17, 145.57, 137.20, 132.42, 129.78, 129.49, 128.08, 115.91, 109.47, 107.53, 107.12, 21.13. HRMS (ESI): calculated for $\text{C}_{13}\text{H}_9\text{ClN}_2$ [ $\text{M}^+$ ] $\text{H}^+$ : 229.0527, found 229.0515. |
|-------------------------------------------------------------------------------------|------------------------------------------------------------------------------------------------------------------------------------------------------------------------------------------------------------------------------------------------------------------------------------------------------------------------------------------------------------------------------------------------------------------------------------------------------------------------------------------------------|

[3.24]  $^1\text{H}$  &  $^{13}\text{C}$  NMR of the 6-Chloro-2-(4-chlorophenyl)imidazo[1,2-a]pyridine (3ec)<sup>1,6</sup>:

|                                                                                   |                                                                                                                                                                                                                                                                                                                                                                                                                                                                                                                 |
|-----------------------------------------------------------------------------------|-----------------------------------------------------------------------------------------------------------------------------------------------------------------------------------------------------------------------------------------------------------------------------------------------------------------------------------------------------------------------------------------------------------------------------------------------------------------------------------------------------------------|
| 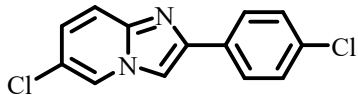 | <p>Pale yellow solid; yield 242 mg (80%); m.p. 206-207 °C; <b><sup>1</sup>H NMR</b> (500 MHz, DMSO) δ (ppm): 8.27 (d, 1H), 7.81 (d, 2H), 7.66 (s, 1H), 7.56 (d, 1H), 7.44 (d, 2H), 7.39 (dd, 1H); <b><sup>13</sup>C NMR</b> (126 MHz, CDCl<sub>3</sub>) δ (ppm): 147.17, 145.57, 132.24, 131.39, 129.78, 129.36, 128.72, 128.03, 115.91, 109.47, 107.53 96 <b>HRMS (ESI)</b>: calculated for C<sub>13</sub>H<sub>8</sub>Cl<sub>2</sub>N<sub>2</sub> [M<sup>+</sup>] H<sup>+</sup>: 262.0101, found 262.0531</p> |
|-----------------------------------------------------------------------------------|-----------------------------------------------------------------------------------------------------------------------------------------------------------------------------------------------------------------------------------------------------------------------------------------------------------------------------------------------------------------------------------------------------------------------------------------------------------------------------------------------------------------|

**[3.25] <sup>1</sup>H and <sup>13</sup>C NMR of the 2-(6-Chloroimidazo[1,2-a]pyridin-2-yl)phenol (3hc)<sup>8</sup>:**

|                                                                                     |                                                                                                                                                                                                                                                                                                                                                                                                                                                                                                                                                    |
|-------------------------------------------------------------------------------------|----------------------------------------------------------------------------------------------------------------------------------------------------------------------------------------------------------------------------------------------------------------------------------------------------------------------------------------------------------------------------------------------------------------------------------------------------------------------------------------------------------------------------------------------------|
| 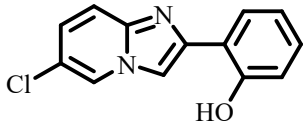 | <p>White solid; yield 218 mg (89%); m.p. 197-199 °C; <b><sup>1</sup>H NMR</b> (500 MHz, DMSO) δ (ppm): 8.26 (d, 1H), 7.77 (s, 1H), 7.64 – 7.56 (m, 2H), 7.42 (ddd, 2H), 7.38 (d, 1H), 6.98 (t, 1H), 6.91 (t, 1H), 1.27 (s, 1H); <b><sup>13</sup>C NMR</b> (126 MHz, CDCl<sub>3</sub>) δ (ppm): 160.10, 145.32, 140.95, 130.76, 129.78, 128.03, 127.15, 121.02, 120.31, 119.66, 115.91, 109.47, 105.41. <b>HRMS (ESI)</b>: Anal. Calcd. For C<sub>13</sub>H<sub>9</sub>ClN<sub>2</sub>O [M<sup>+</sup>] H<sup>+</sup> 244.0241; Found: 243.0321</p> |
|-------------------------------------------------------------------------------------|----------------------------------------------------------------------------------------------------------------------------------------------------------------------------------------------------------------------------------------------------------------------------------------------------------------------------------------------------------------------------------------------------------------------------------------------------------------------------------------------------------------------------------------------------|

[3.26] <sup>1</sup>H and <sup>13</sup>C NMR of the 8-(Phenoxymethyl)-2-phenylimidazo[1,2-a]pyridine (3ad)<sup>9</sup>:

|                                                                                   |                                                                                                                                                                                                                                                                                                                                                                                                                                                                                                                                                                                            |
|-----------------------------------------------------------------------------------|--------------------------------------------------------------------------------------------------------------------------------------------------------------------------------------------------------------------------------------------------------------------------------------------------------------------------------------------------------------------------------------------------------------------------------------------------------------------------------------------------------------------------------------------------------------------------------------------|
| 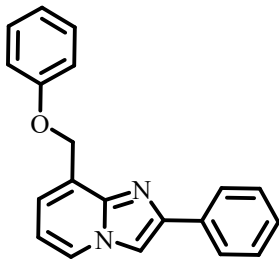 | Pale yellow solid; yield 337 mg (89%); m.p. 130-131 °C; <sup>1</sup> H NMR (500 MHz, DMSO) δ (ppm): 8.16 – 7.84 (m, 2H), 7.63 (s, 1H), 7.42 (dd, 1H), 7.33 – 7.23 (m, 4H), 6.99 (dd, 2H), 6.91 (d, 1H), 6.89 (dd, 1H), 6.23 (d, 1H), 5.23 (s, 2H); <sup>13</sup> C NMR (126 MHz, CDCl <sub>3</sub> ) δ (ppm): 159.22, 141.77, 140.85, 129.54, 129.09, 127.06, 126.52, 121.46, 120.45, 115.72, 108.45, 108.10, 112.5, 109.3, 103.4, 69.44 <b>HRMS</b> (ESI): Anal. Calcd. For C <sub>13</sub> H <sub>9</sub> ClN <sub>2</sub> O [M <sup>+</sup> ] H <sup>+</sup> 244.0241; Found: 243.0321. |
|-----------------------------------------------------------------------------------|--------------------------------------------------------------------------------------------------------------------------------------------------------------------------------------------------------------------------------------------------------------------------------------------------------------------------------------------------------------------------------------------------------------------------------------------------------------------------------------------------------------------------------------------------------------------------------------------|

[3.27] <sup>1</sup>H and <sup>13</sup>C NMR of the 2-methylimidazo[1,2-a]pyridine of (3ae)<sup>2</sup>

|                                                                                     |                                                                                                                                                                                                                                                                                                                                                                                                                                                                                                   |
|-------------------------------------------------------------------------------------|---------------------------------------------------------------------------------------------------------------------------------------------------------------------------------------------------------------------------------------------------------------------------------------------------------------------------------------------------------------------------------------------------------------------------------------------------------------------------------------------------|
| 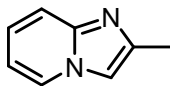 | cherry-colored liquid; yield 237 mg (60%); m.p. 39-42 °C; <sup>1</sup> H NMR (500 MHz, CDCl <sub>3</sub> ) δ 8.20 (d, J = 6.7 Hz, 1H), 7.56 (d, J = 9.9 Hz, 1H), 7.49 (s, 1H), 7.17-7.06 (m, 1H), 6.90 (t, J = 6.7 Hz, 1H), 2.45 (s, 3H) <sup>13</sup> C NMR (126 MHz, CDCl <sub>3</sub> ) δ 143.46, 125.25, 124.04, 116.90, 111.85, 109.54, 14.51 <b>HRMS</b> m/z (ESI): calcd. for [C <sub>8</sub> H <sub>8</sub> N <sub>2</sub> ] [M <sup>+</sup> ] H <sup>+</sup> : 133.0767 Found : 133.0759 |
|-------------------------------------------------------------------------------------|---------------------------------------------------------------------------------------------------------------------------------------------------------------------------------------------------------------------------------------------------------------------------------------------------------------------------------------------------------------------------------------------------------------------------------------------------------------------------------------------------|

[3.28] <sup>1</sup>H and <sup>13</sup>C NMR of of the 2-pentylimidazo[1,2-a]pyridine of (3be)<sup>9</sup>

|                                                                                     |                                                                                                                                                                                                                                                                                                                                                                                                                                                                                                                                                                 |
|-------------------------------------------------------------------------------------|-----------------------------------------------------------------------------------------------------------------------------------------------------------------------------------------------------------------------------------------------------------------------------------------------------------------------------------------------------------------------------------------------------------------------------------------------------------------------------------------------------------------------------------------------------------------|
| 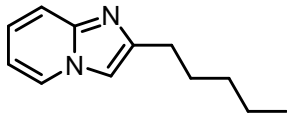 | Pale yellow liquid; yield 137 mg (45%); m.p. 40-45 °C; <sup>1</sup> H NMR (500 MHz, CDCl <sub>3</sub> ) δ (ppm): δ 8.20 (m, 1H), 7.57 (d, J = 9.0 Hz, 1H), 7.49 (s, 1H), 7.17 (m, 1H), 6.90 (t, J = 6.8 Hz, 1H), 2.71 (t, J = 7.6 Hz, 2H), 1.79 (m, 2H), 1.32 (t, J = 7.4 Hz, 3H) <sup>13</sup> C NMR (126 MHz, CDCl <sub>3</sub> ) δ 148.08, 144.91, 125.24, 123.91, 116.81, 111.71, 108.88, 29.70, 28.92, 22. <b>HRMS</b> m/z (ESI) :calcd. for [C <sub>10</sub> H <sub>12</sub> N <sub>2</sub> ] [M <sup>+</sup> ] H <sup>+</sup> : 161.1072 Found: 161.1067 |
|-------------------------------------------------------------------------------------|-----------------------------------------------------------------------------------------------------------------------------------------------------------------------------------------------------------------------------------------------------------------------------------------------------------------------------------------------------------------------------------------------------------------------------------------------------------------------------------------------------------------------------------------------------------------|

**[3.29] <sup>1</sup>H and <sup>13</sup>C NMR of the 2-propylimidazo[1,2-a]pyridine of (3ce)<sup>9</sup>**

|                                                                                   |                                                                                                                                                                                                                                                                                                                                                                                                                                                                                                                                                                                       |
|-----------------------------------------------------------------------------------|---------------------------------------------------------------------------------------------------------------------------------------------------------------------------------------------------------------------------------------------------------------------------------------------------------------------------------------------------------------------------------------------------------------------------------------------------------------------------------------------------------------------------------------------------------------------------------------|
| 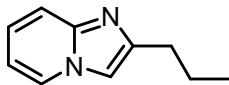 | Pale yellow liquid; yield 127 mg (48%); m.p. 45-50 °C; <b><sup>1</sup>H NMR</b> (500 MHz, CDCl <sub>3</sub> ) δ (ppm): 8.20 (m, 1H), 7.57 (d, J = 9.0 Hz, 1H), 7.49 (s, 1H), 7.17 (m, 1H), 6.90 (t, J = 6.8 Hz, 1H), 2.70 (t, J = 7.6 Hz, 2H), 1.78 (m, 2H), 1.04 (t, J = 7.4 Hz, 3H) <b><sup>13</sup>C NMR</b> (126 MHz, CDCl <sub>3</sub> ) δ (ppm): δ 147.88, 144.96, 125.27, 123.96, 116.86, 111.76, 109.02, 30.99, 22.59, 14.05 <b>HRMS</b> (ESI): Anal. calcd. for [C <sub>10</sub> H <sub>12</sub> N <sub>2</sub> [M <sup>+</sup> ] H <sup>+</sup> ]: 161.1073 Found: 161.1068 |
|-----------------------------------------------------------------------------------|---------------------------------------------------------------------------------------------------------------------------------------------------------------------------------------------------------------------------------------------------------------------------------------------------------------------------------------------------------------------------------------------------------------------------------------------------------------------------------------------------------------------------------------------------------------------------------------|

**[3.30] <sup>1</sup>H and <sup>13</sup>C NMR of the 2-isopropylimidazo[1,2-a]pyridine (3de)<sup>2</sup>**

|                                                                                     |                                                                                                                                                                                                                                                                                                                                                                                                                                                                                                                                                                                                        |
|-------------------------------------------------------------------------------------|--------------------------------------------------------------------------------------------------------------------------------------------------------------------------------------------------------------------------------------------------------------------------------------------------------------------------------------------------------------------------------------------------------------------------------------------------------------------------------------------------------------------------------------------------------------------------------------------------------|
| 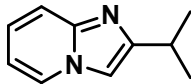 | White solid; yield 157 mg (40%); m.p. 80-100 °C; <b><sup>1</sup>H NMR</b> (500 MHz, CDCl <sub>3</sub> ) δ (ppm): δ 8.20 (dt, J = 6.8, 1.2 Hz, 1H), 7.57 (dd, J = 9.1, 0.7 Hz, 1H), 7.49 (s, 1H), 7.17 (m, 1H), 6.90 (td, J = 6.8, 1.1 Hz, 1H), 2.97 (m, 1H), 1.35 (d, J = 4 Hz, 6H) <b><sup>13</sup>C NMR</b> (126 MHz, CDCl <sub>3</sub> ) δ (ppm): 154.13, 144.96, 125.43, 123.97, 117.03, 111.72, 107.43, 28.44, 22.51 <b>HRMS</b> (ESI): Anal. Calcd. For HRMS m/z (ESI): calcd. for [C <sub>10</sub> H <sub>12</sub> N <sub>2</sub> ] [M <sup>+</sup> ] H <sup>+</sup> : 161.1073 Found: 161.1076 |
|-------------------------------------------------------------------------------------|--------------------------------------------------------------------------------------------------------------------------------------------------------------------------------------------------------------------------------------------------------------------------------------------------------------------------------------------------------------------------------------------------------------------------------------------------------------------------------------------------------------------------------------------------------------------------------------------------------|

**4. References:**

- [1] X. Q. Yu, M. L. Feng, S. Q. Li, H. Z. He, L. Y. Xi, S. Y. Chen, *Green Chem.*, **2019**, 21, 1619-1624.
- [2] D. C. Mohan, S. N. Rao, C. Ravi, S. Adimurthy, *Asian J. Org. Chem.*, **2014**, 3, 609-613.
- [3] Z. H. Ren, M. N. Zhao, Y. K. Yi, Y. Y. Wang, Z. H. Guan, *Synthesis*, **2016**, 48, 1920-1926.
- [4] K. Godugu, C. G. R. Nallagonda, *Journal of Heterocyclic Chemistry*, **2021**, 58, 250-259.
- [5] X. Meng, Y. M. Wang, C. Y. Yu, P. Q. Zhao, *RSC Advances*, **2014**, 4, 27301-27307.
- [6] S. Kundu, B. Basu, *RSC Advances*, **2015**, 5, 50178-50185.
- [7] Y. Liu, Z. Q. Wang, T. Lei, Y. L. Li, *ChemistrySelect*, **2022**, 7.

[8] M. H. Shinde, U. A. Kshirsagar, *Green Chemistry*, **2016**, 18, 1455-1458.

[9] Y. F. Zhang, Z. K. Chen, W. L. Wu, Y. H. Zhang, W. P. Su, *Journal of Organic Chemistry*, **2013**, 78, 12494-12504.

---

## **5. $^1\text{H}$ NMR and $^{13}\text{C}$ NMR spectra of the synthesized compounds (3aa-3de)**

---

### [ 3.1 ] 2-phenylimidazo[1,2-a] pyridine(3aa) of $^{13}\text{C}$ and $^1\text{H}$ NMR

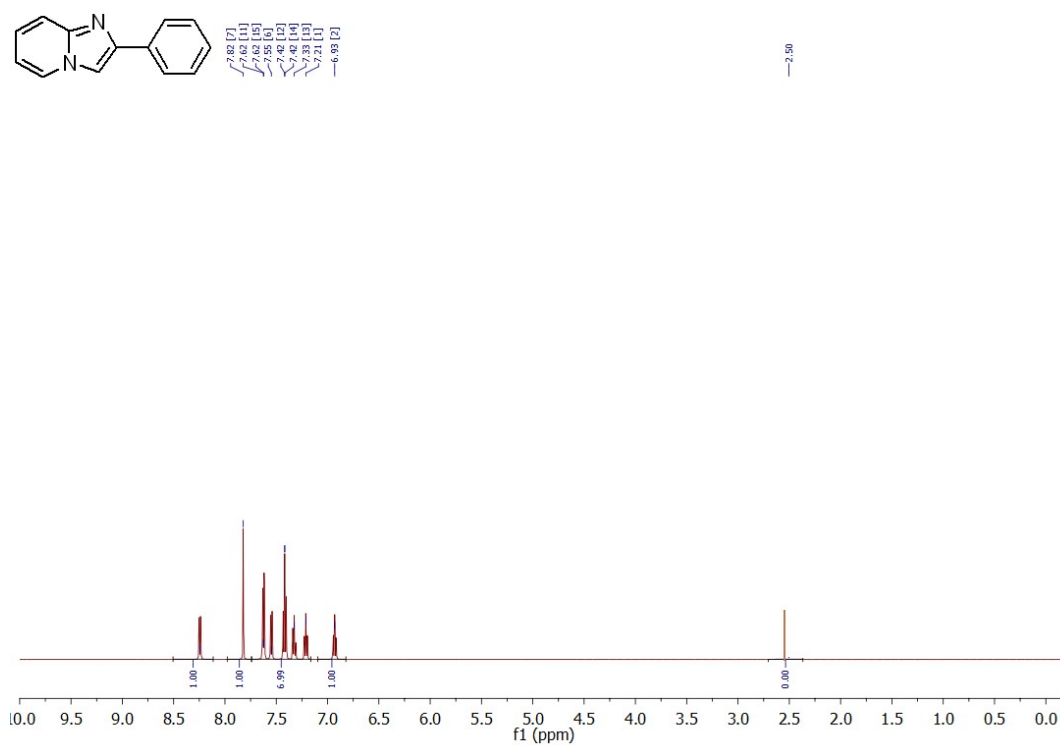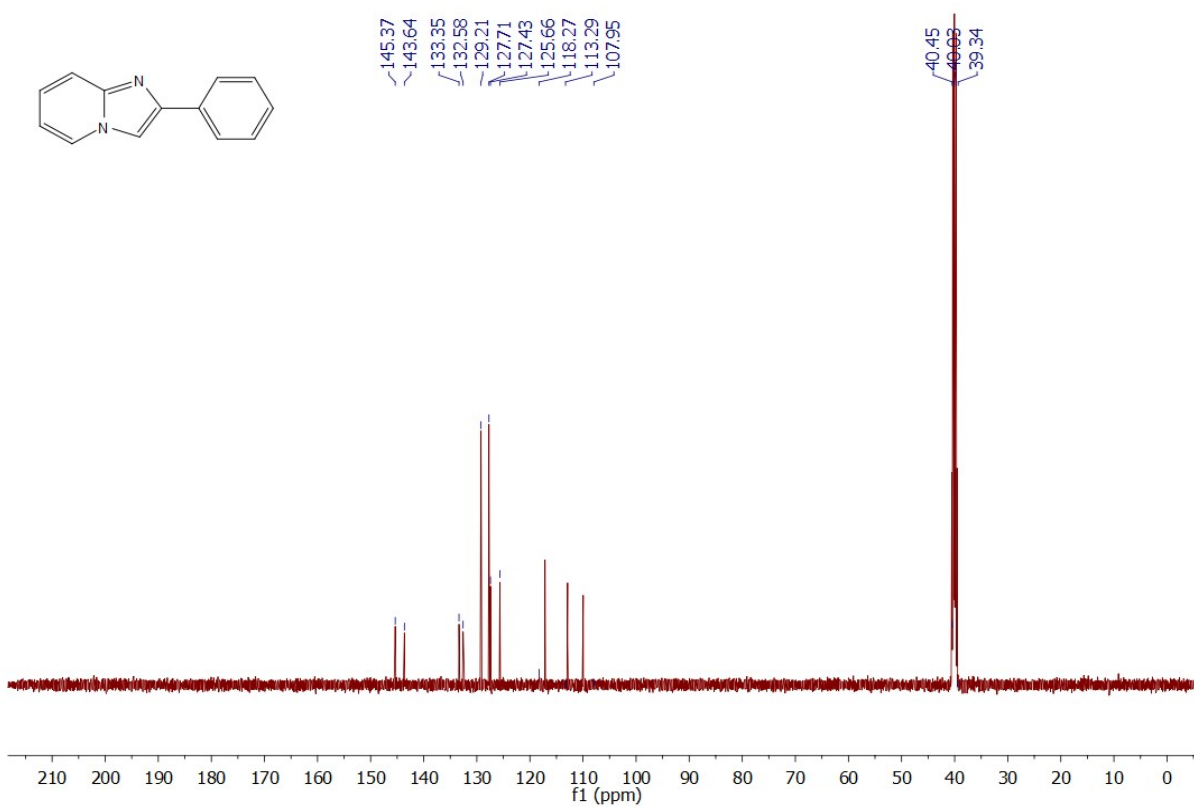

### [3.2], $^1\text{H}$ and $^{13}\text{C}$ NMR of the 2-(p-Tolyl)imidazo[1,2-a]pyridine(3ba) .



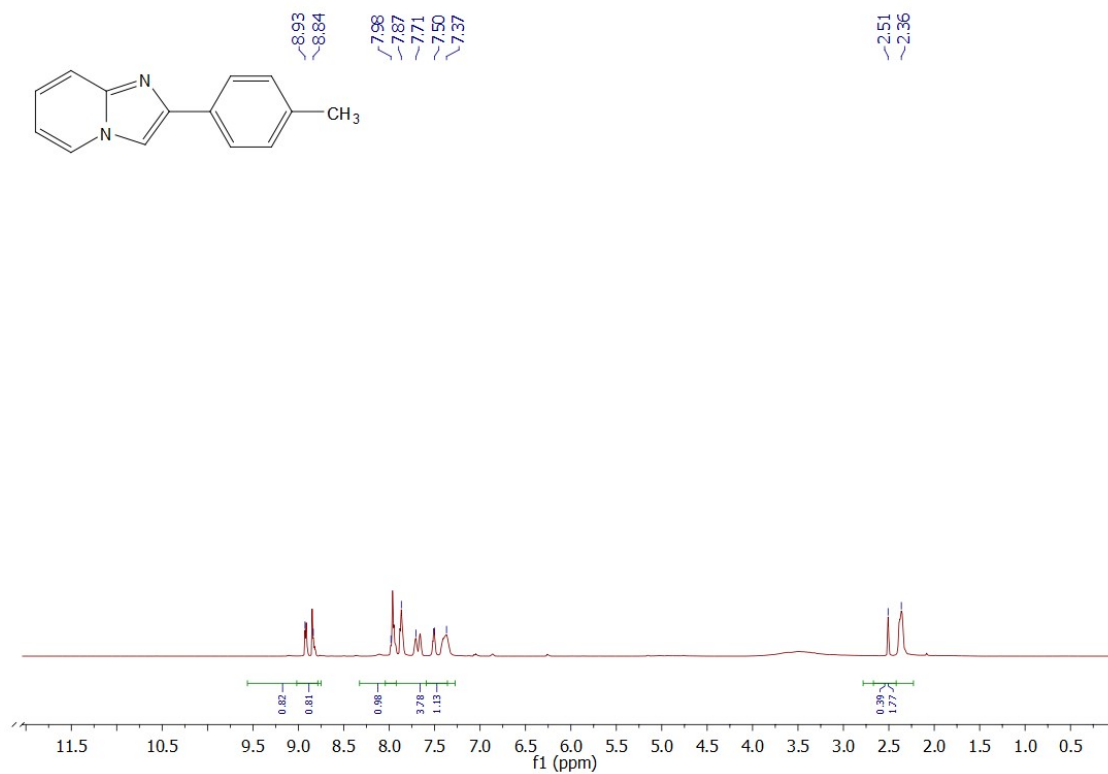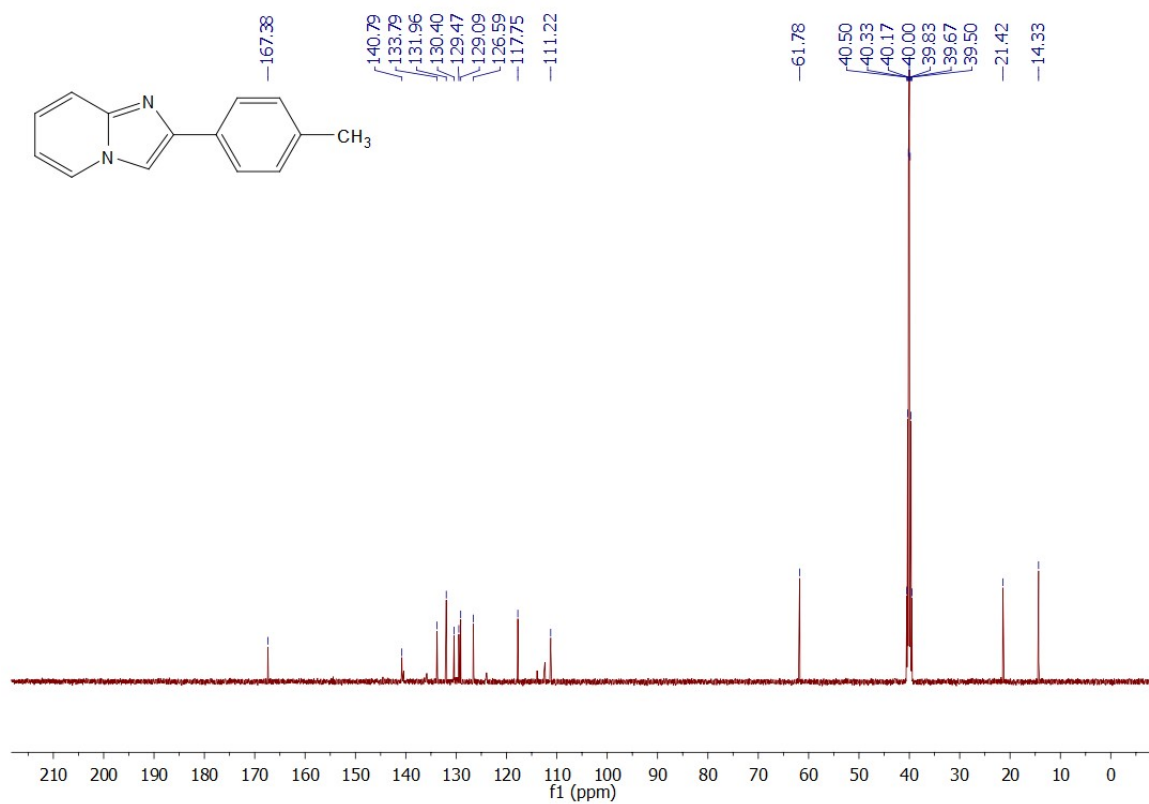

[3.3]  $^1\text{H}$  and  $^{13}\text{C}$  NMR of the 2-(4-Methoxyphenyl)imidazo[1,2-a]pyridine(3ca)

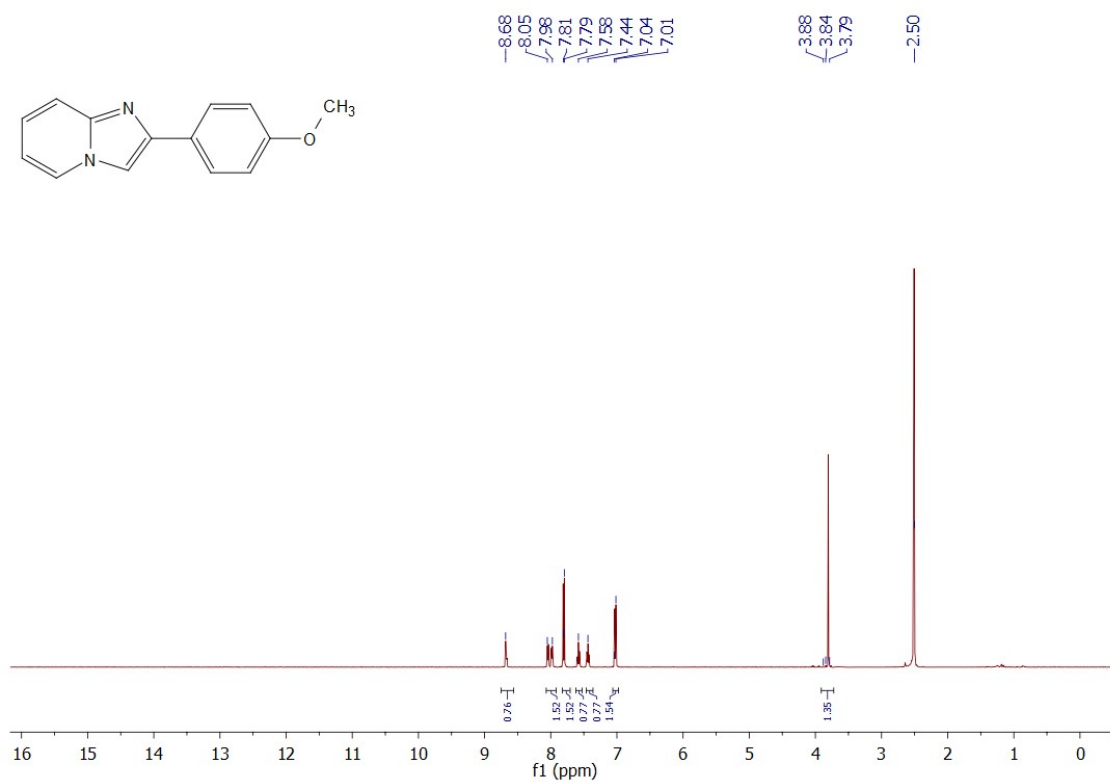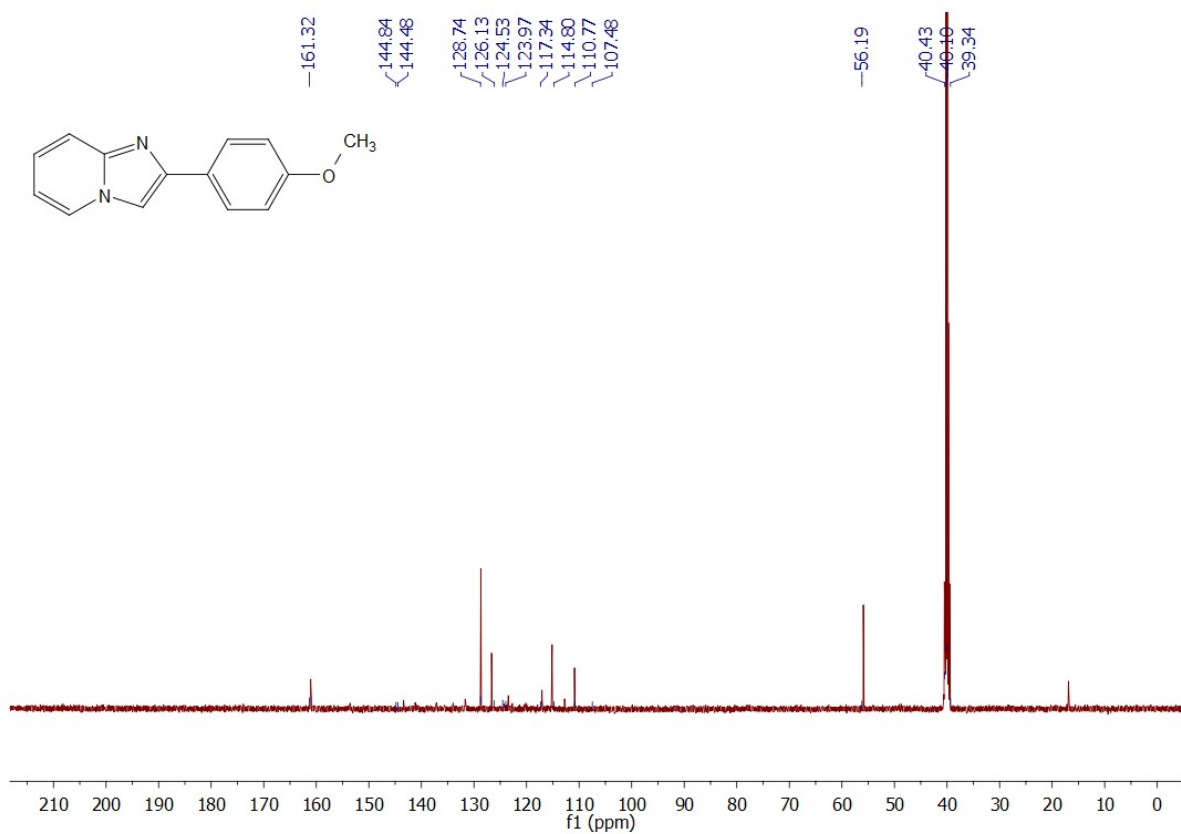

[3.4],  $^1\text{H}$  and  $^{13}\text{C}$  NMR of the 2-(4nitrophenyl)imidazo[1,2-a]pyridine (3da) .

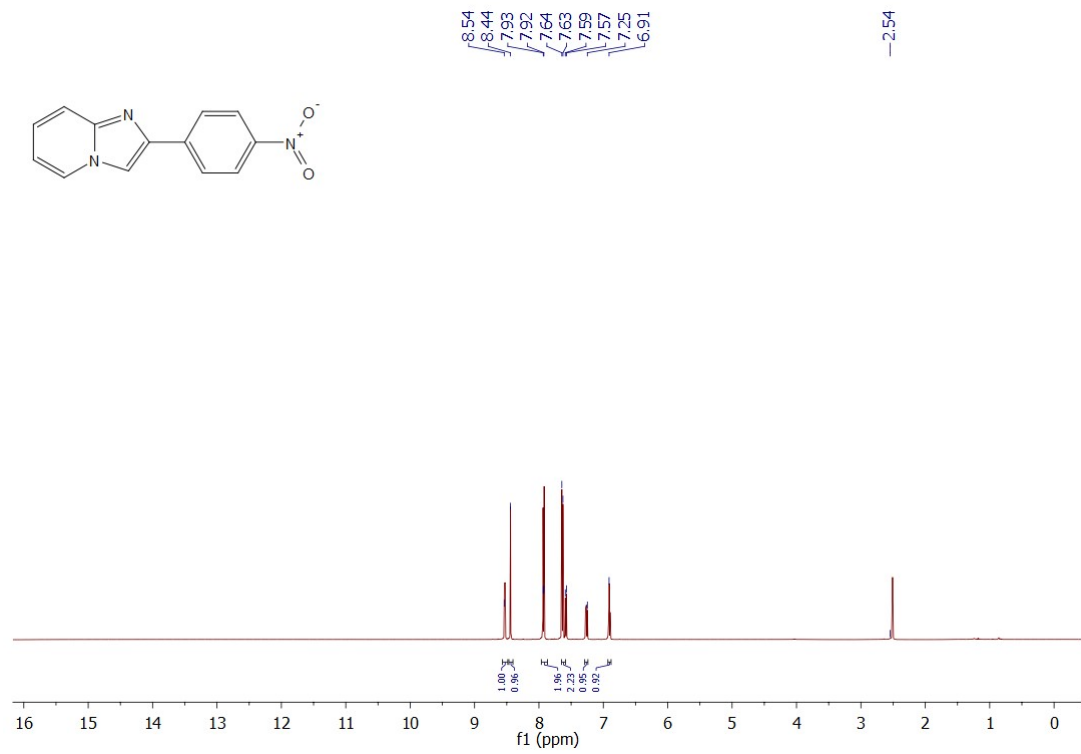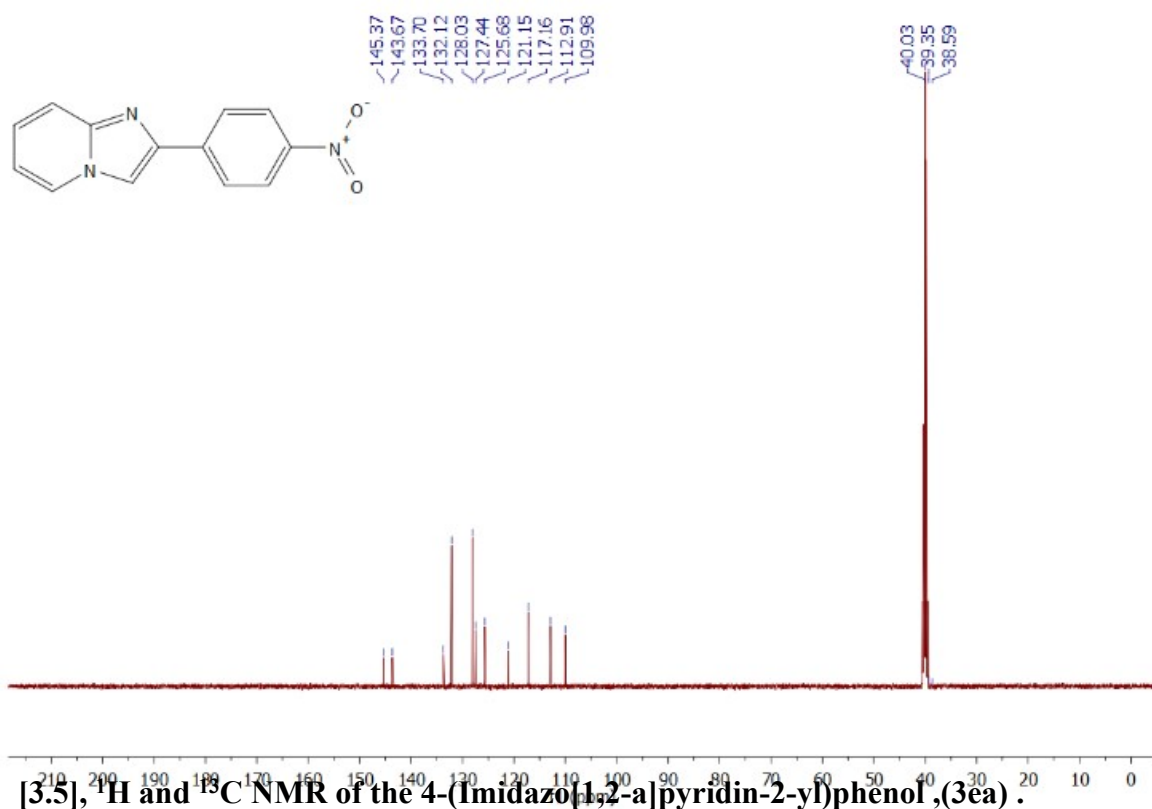

[3.5], <sup>1</sup>H and <sup>13</sup>C NMR of the 4-(Imidazo[1,2-a]pyridin-2-yl)phenol, (3ea).

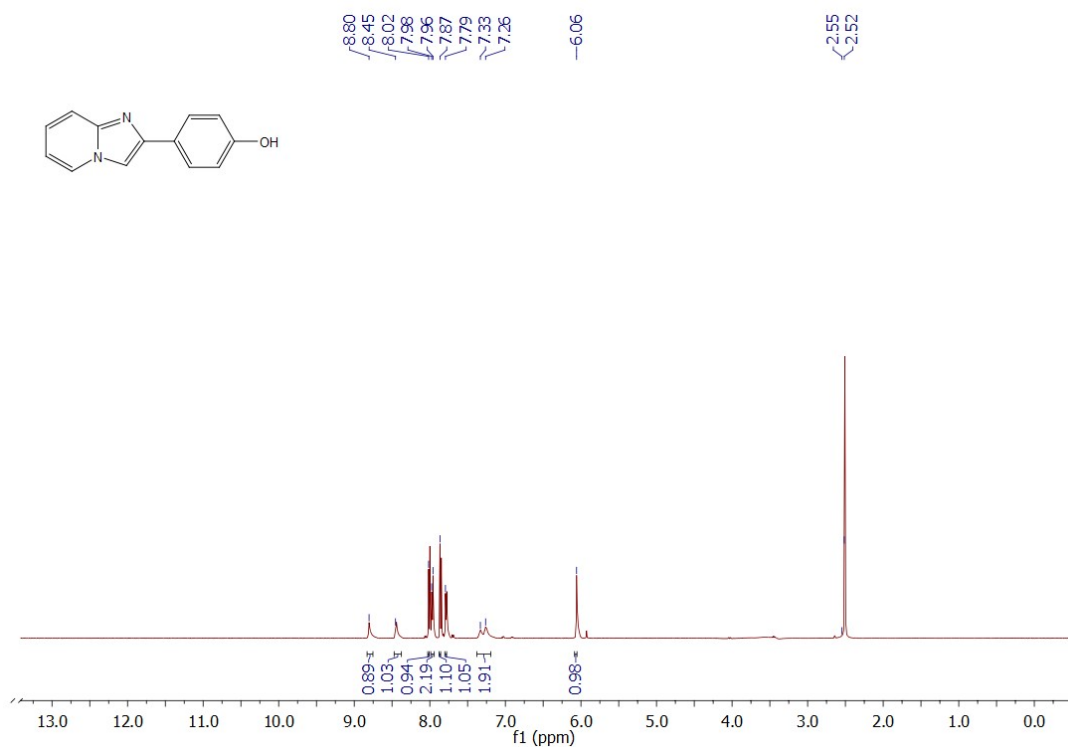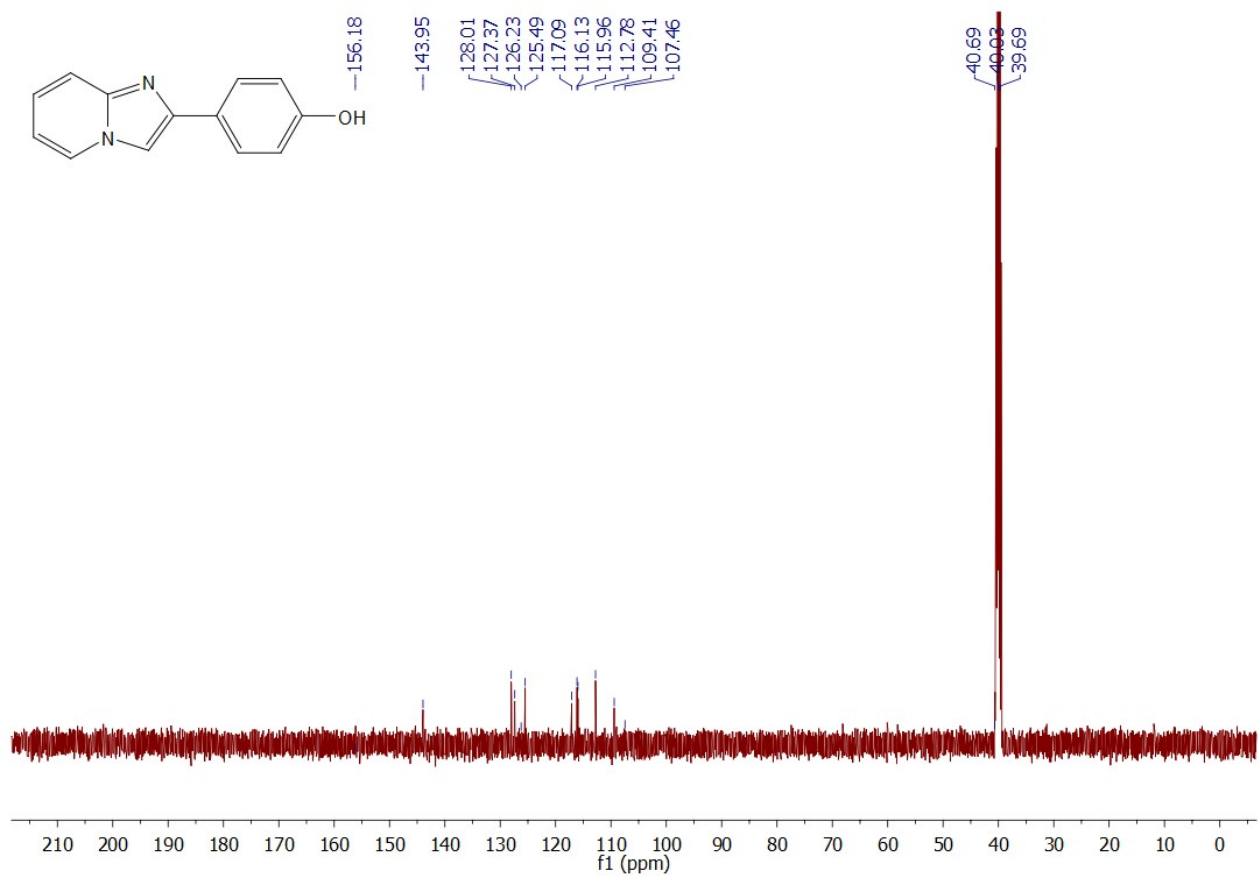

[3.6], <sup>1</sup>H and <sup>13</sup>C NMR of the 2-(4-Bromophenyl)imidazo[1,2-a]pyridine (3fa) .

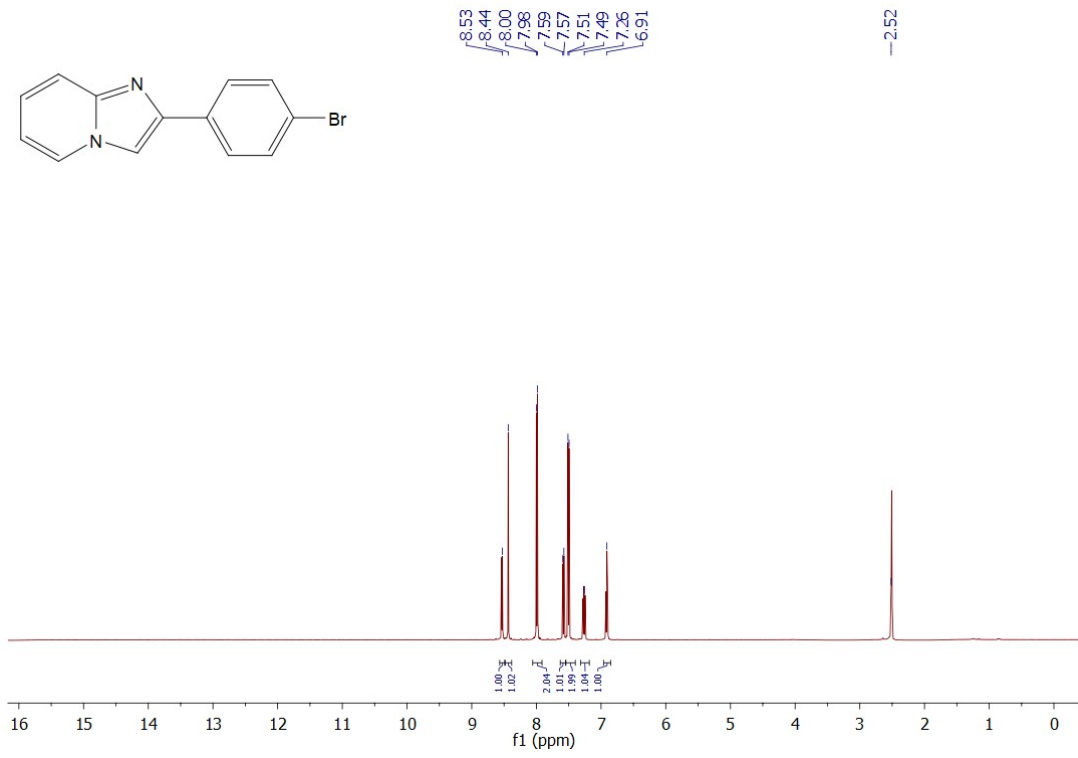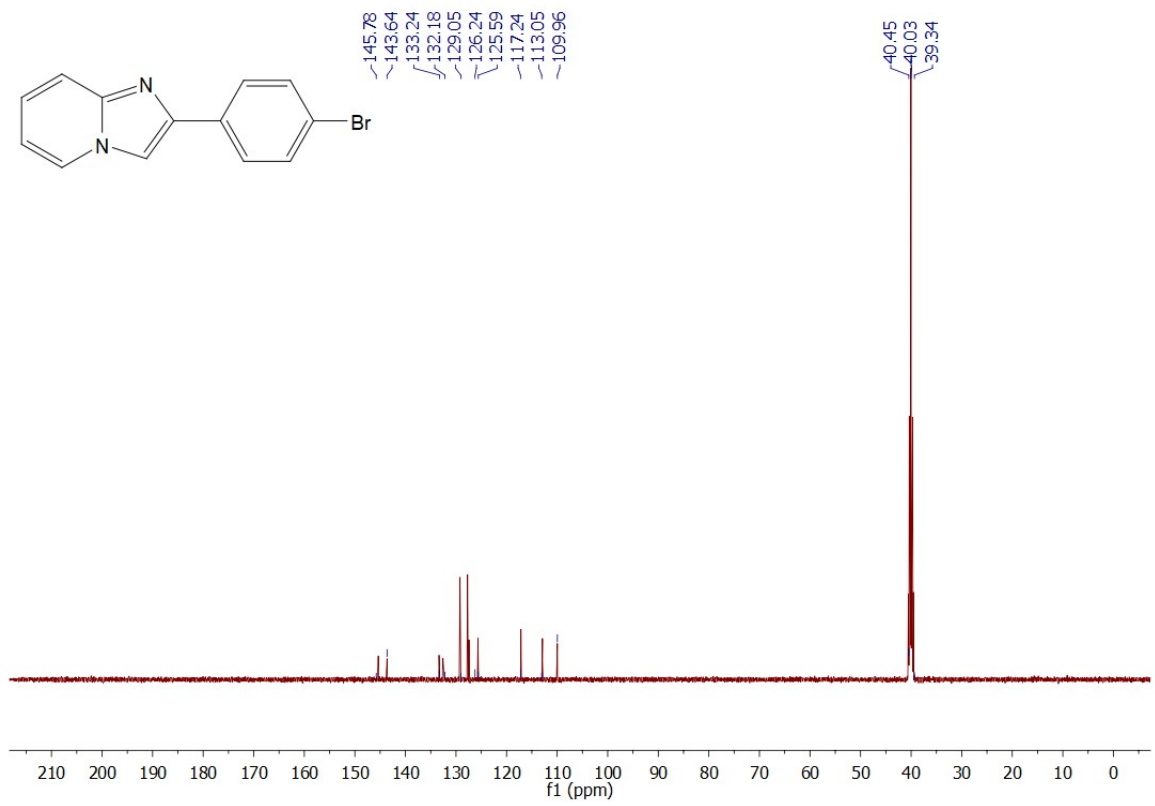

[3.7], <sup>1</sup>H and <sup>13</sup>C NMR of 2-(4-Fluorophenyl)imidazo[1,2-a]pyridine(3ga).

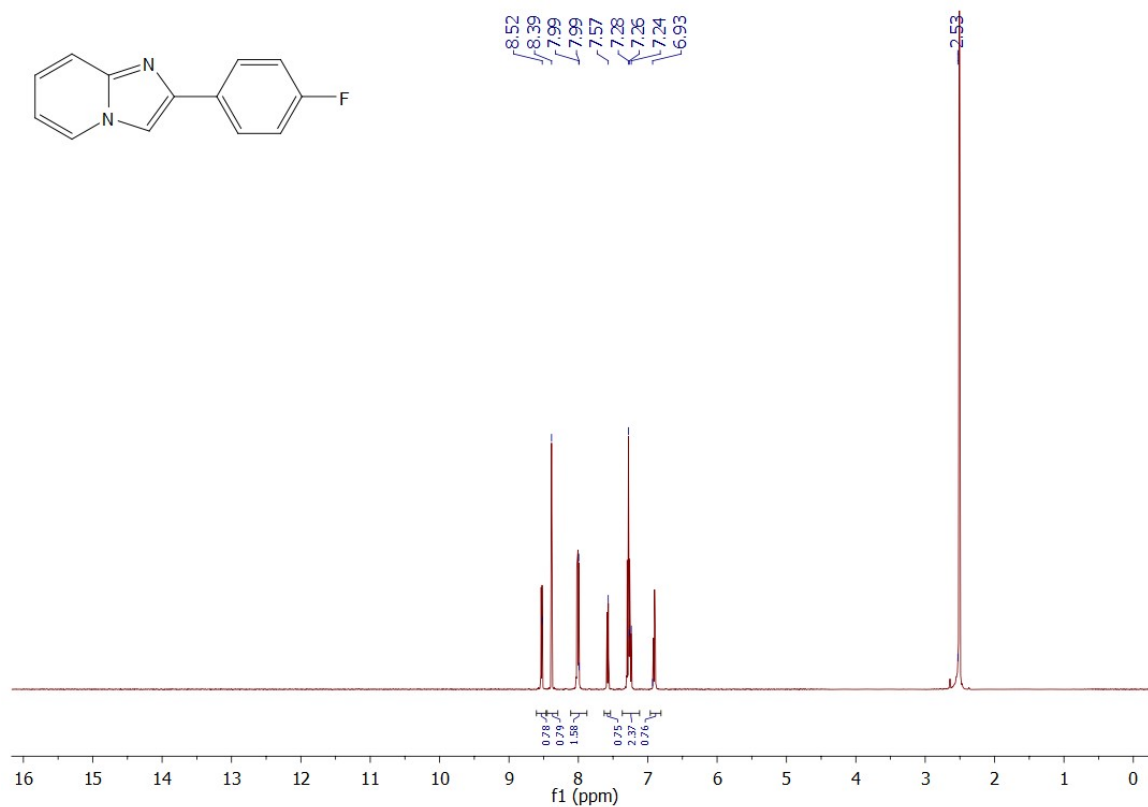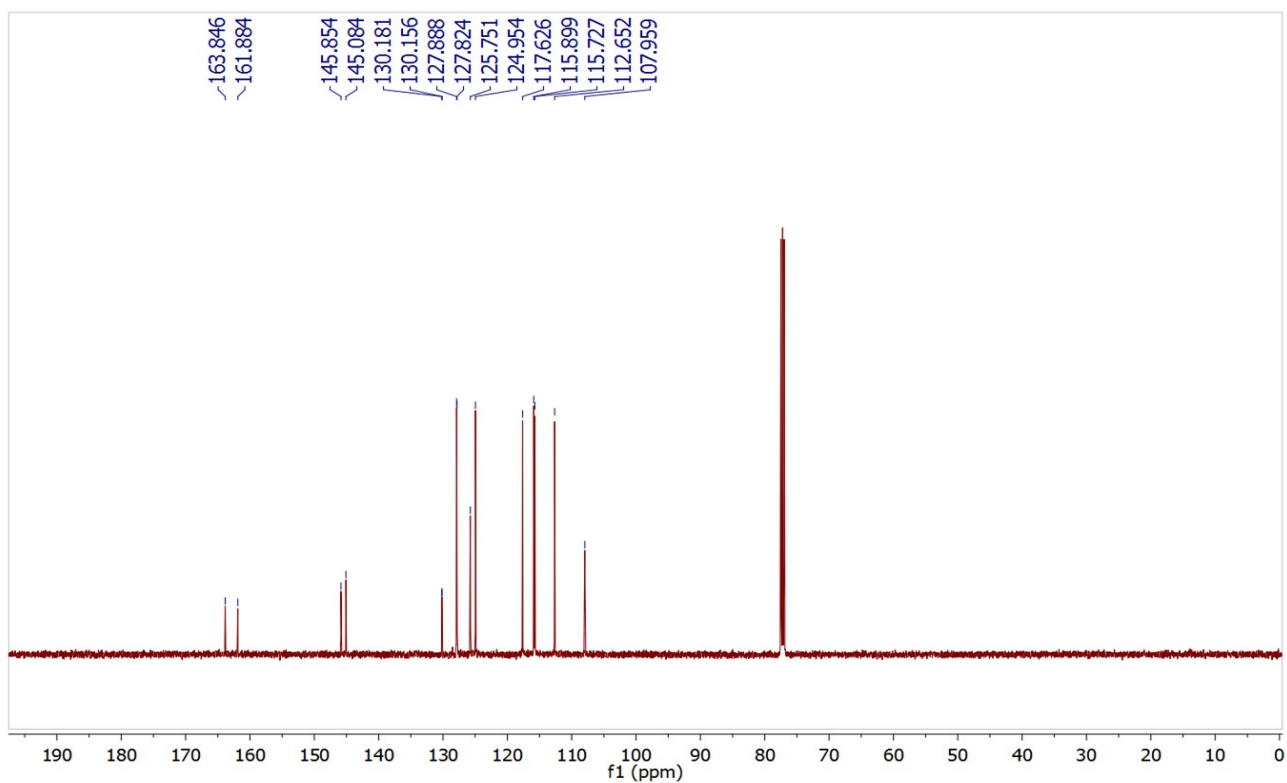

**[3.7]  $^{19}\text{F}$  NMR of 2-(4-Fluorophenyl)imidazo[1,2-a]pyridine(3ga):**

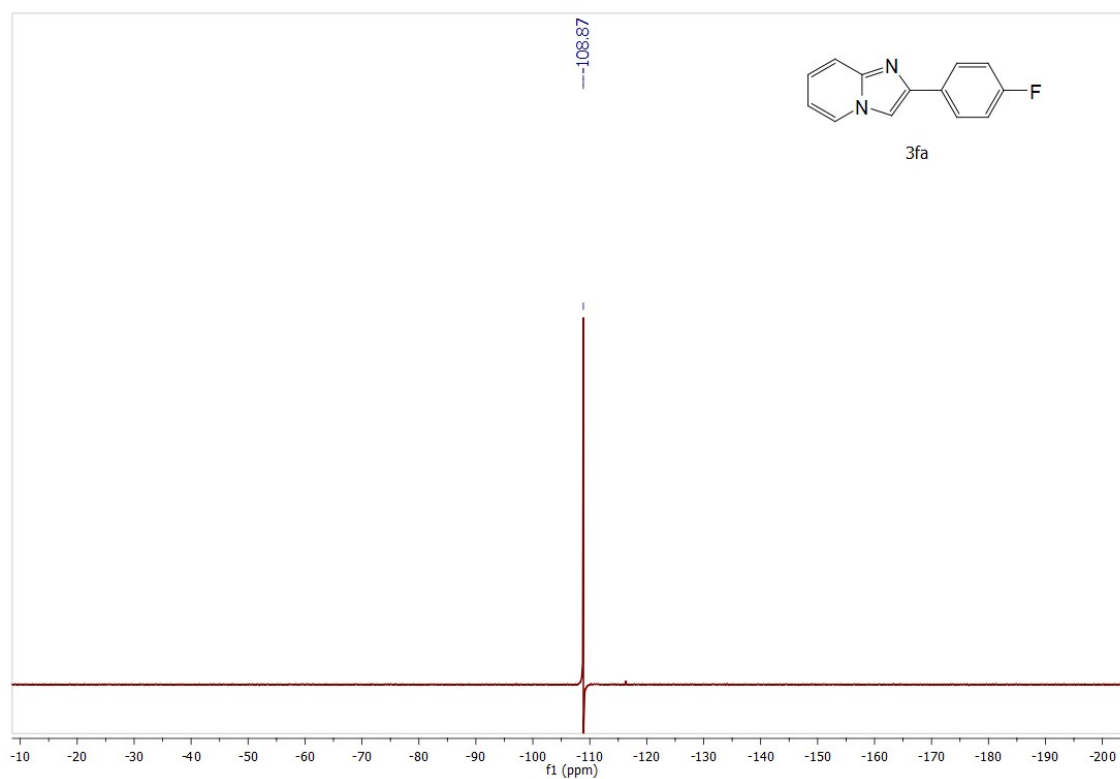

**[3.7] HRMS of 2-(4-Fluorophenyl)imidazo[1,2-a]pyridine(3ga)**

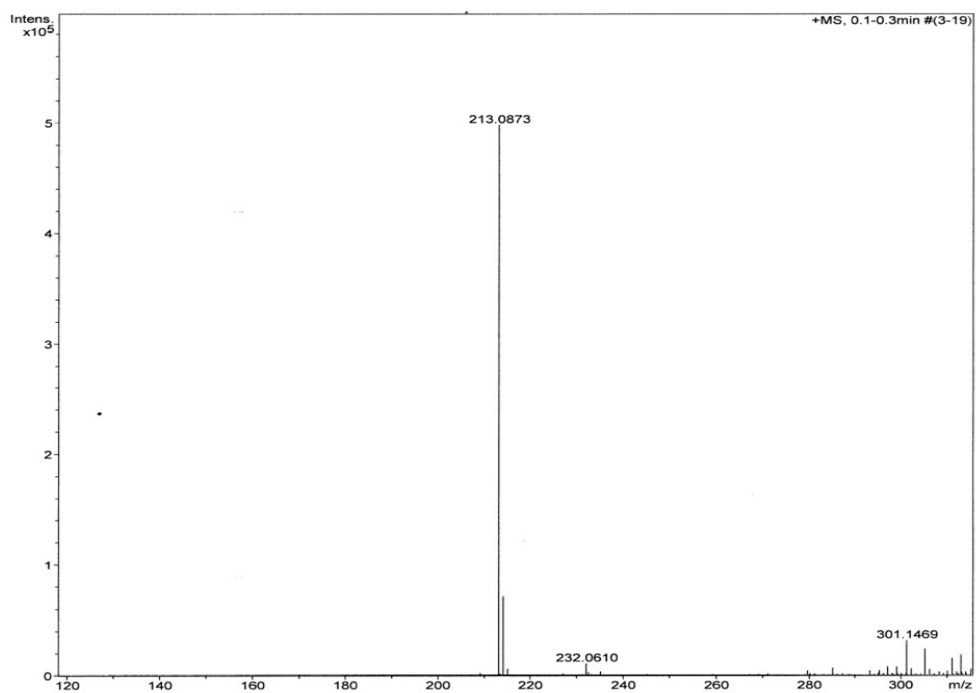

**[3.8]  $^1\text{H}$  &  $^{13}\text{C}$  NMR of the 4-(imidazo[1,2-a]pyridine-2-yl)benzotrile, of (3ha):**

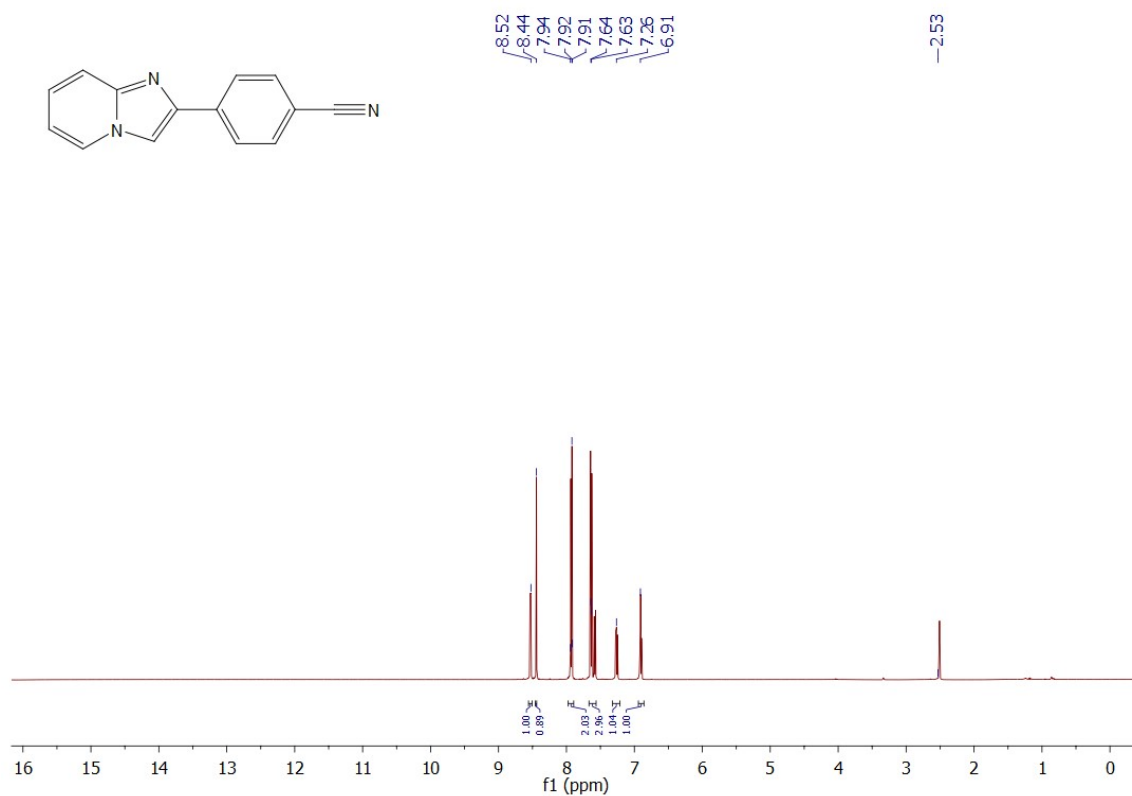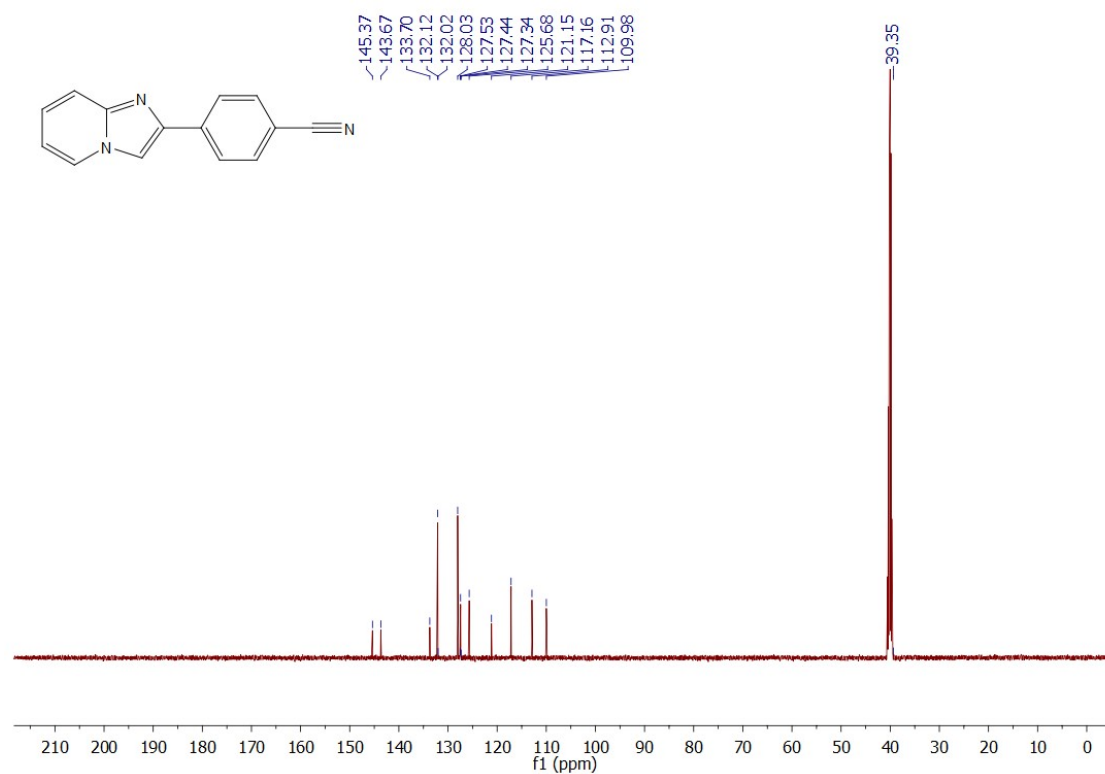



[3.9] ( $^1\text{H}$  &  $^{13}\text{C}$  NMR), of the 2-(4-Chlorophenyl) imidazo[1,2-a] pyridine (3ia)

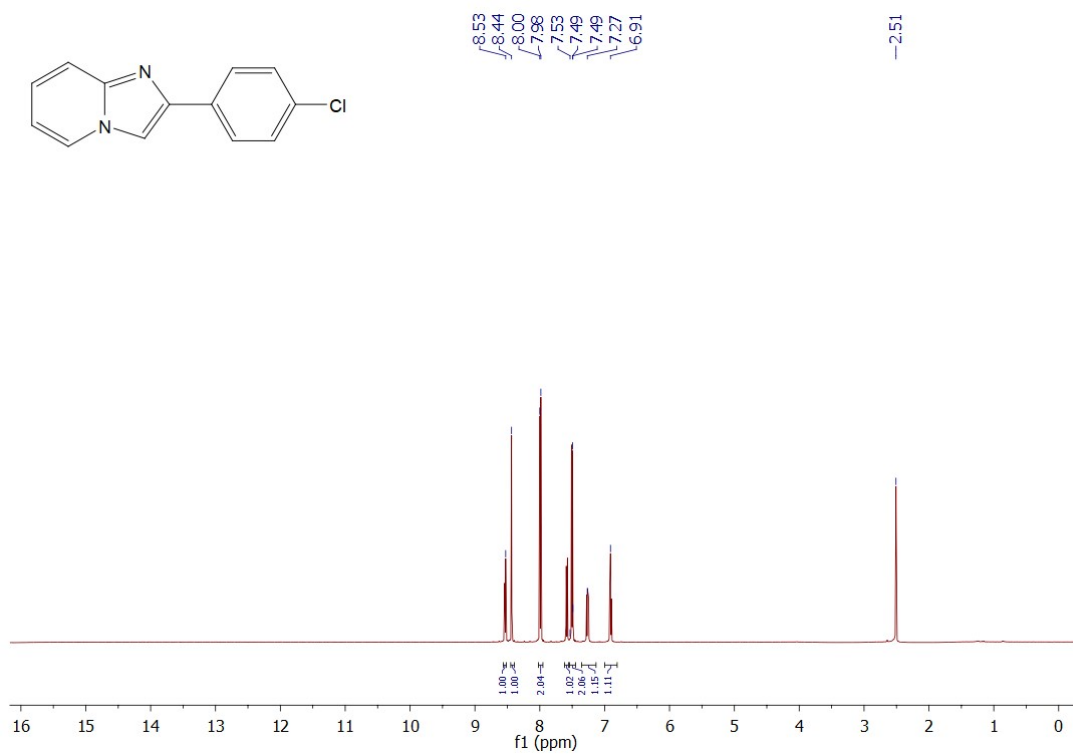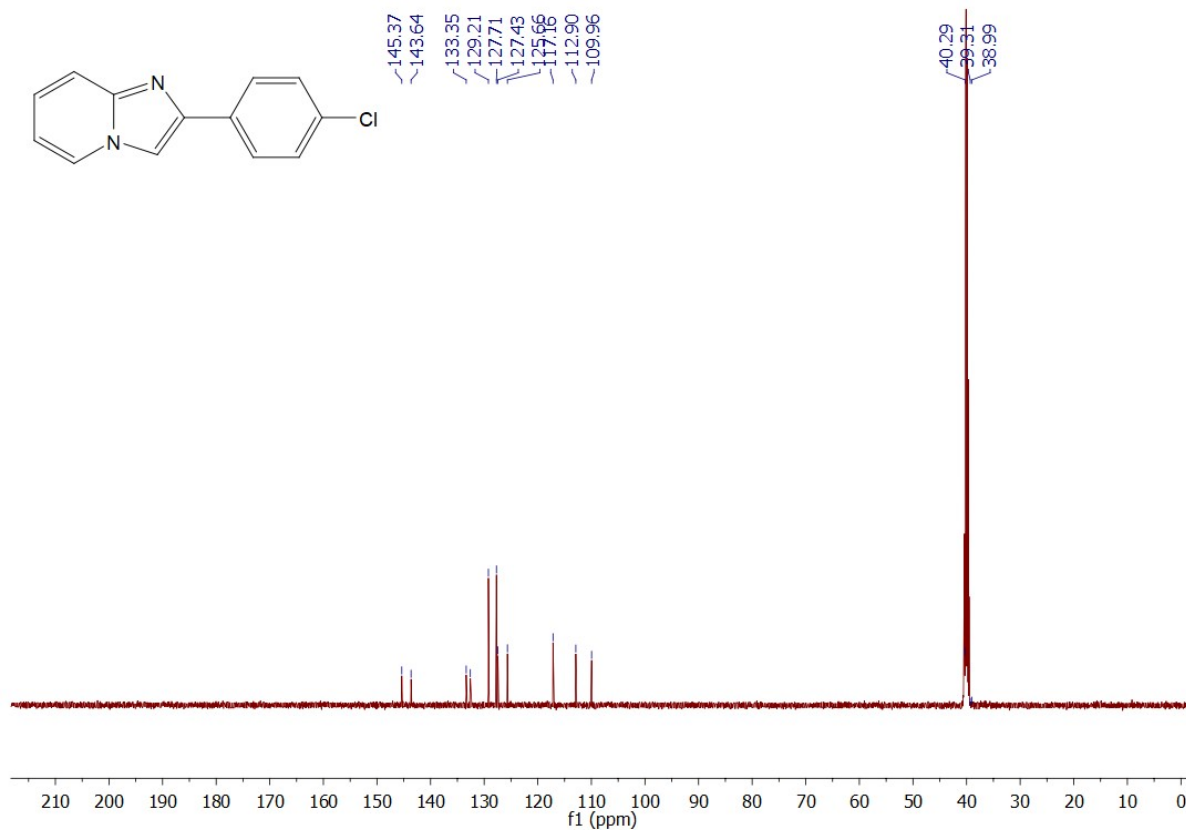

[3.10]  $^1\text{H}$  and  $^{13}\text{C}$  NMR of the 2-(Pyridin-2-yl) imidazo[1,2-a] pyridine (3ja)

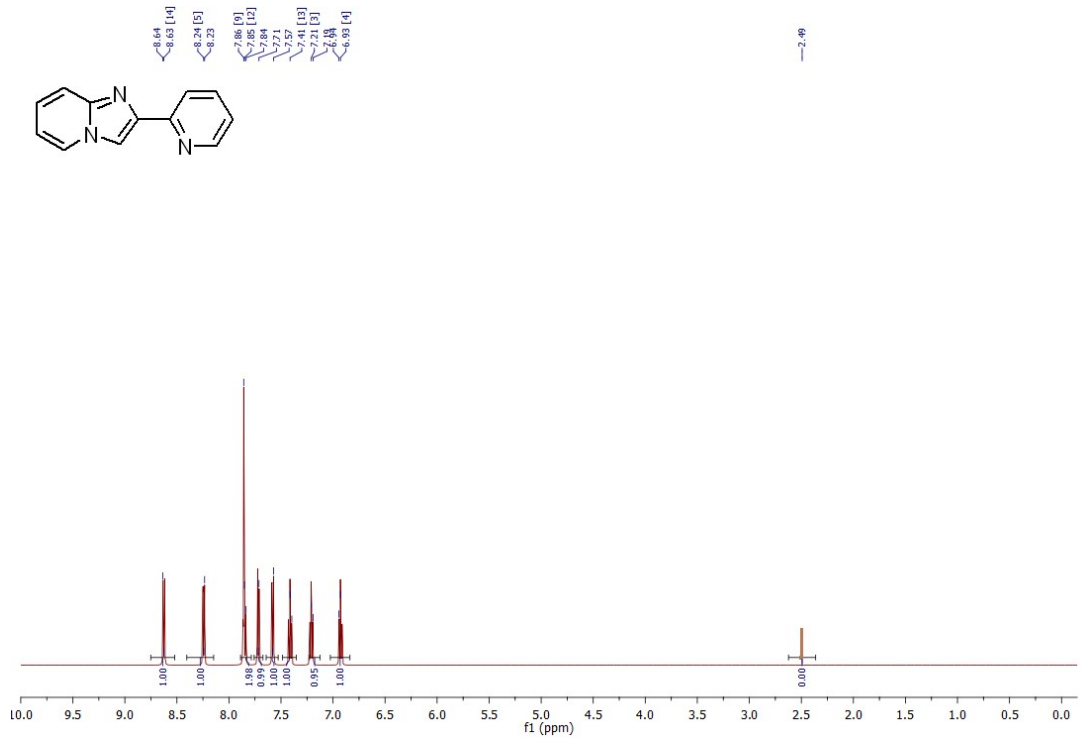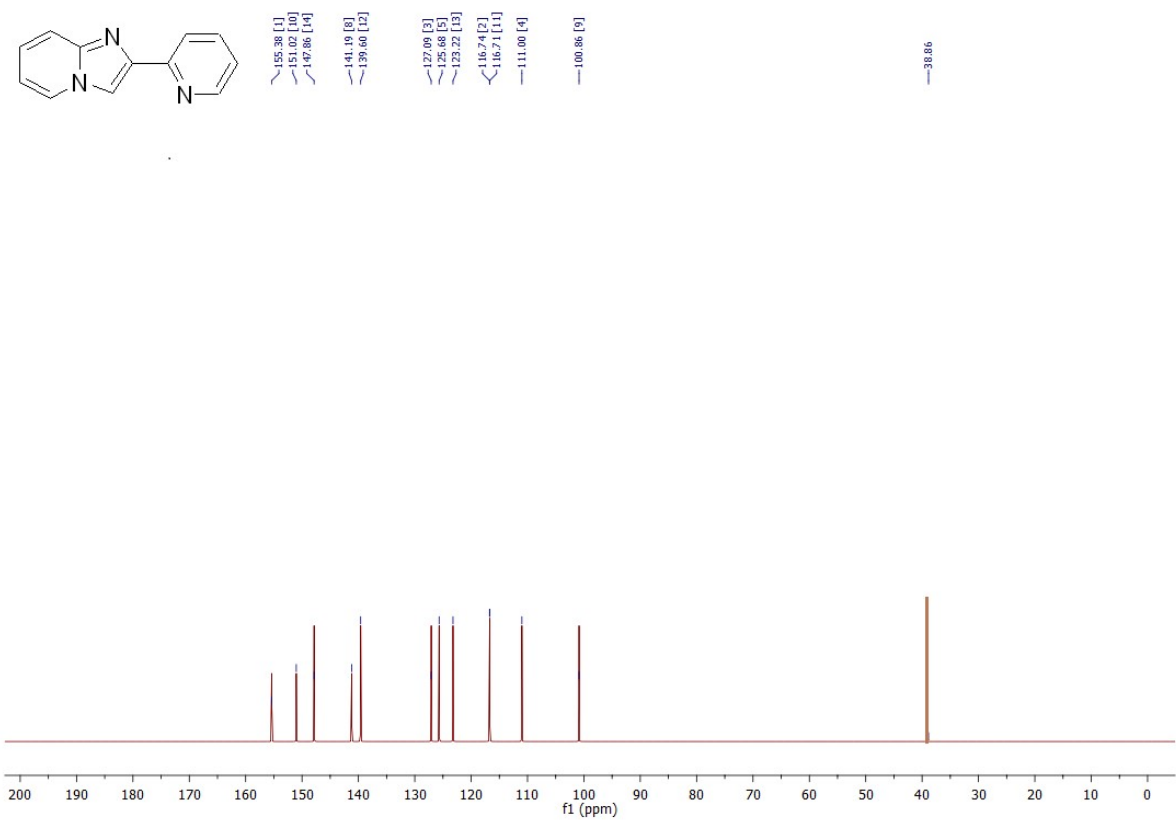

[3.11] (<sup>1</sup>H and <sup>13</sup>C NMR of the)2-(Thiophen-2-yl) imidazo[1,2-a] pyridine (3ka)

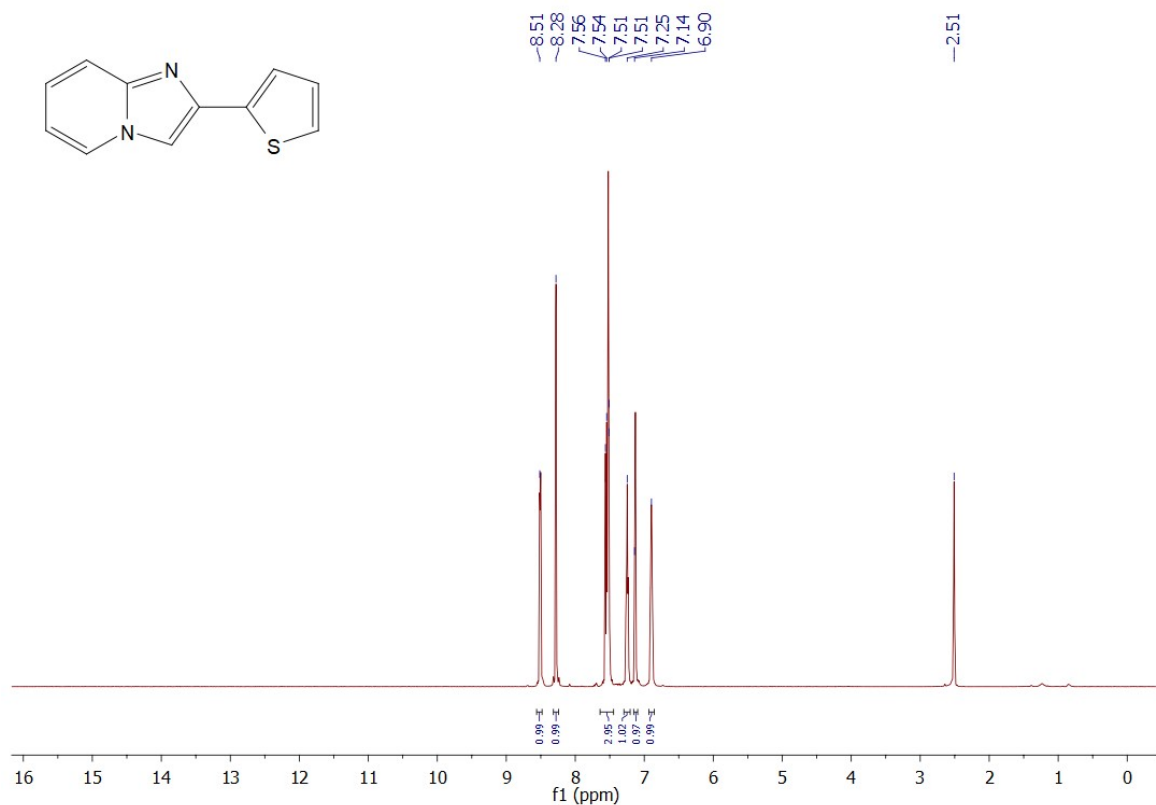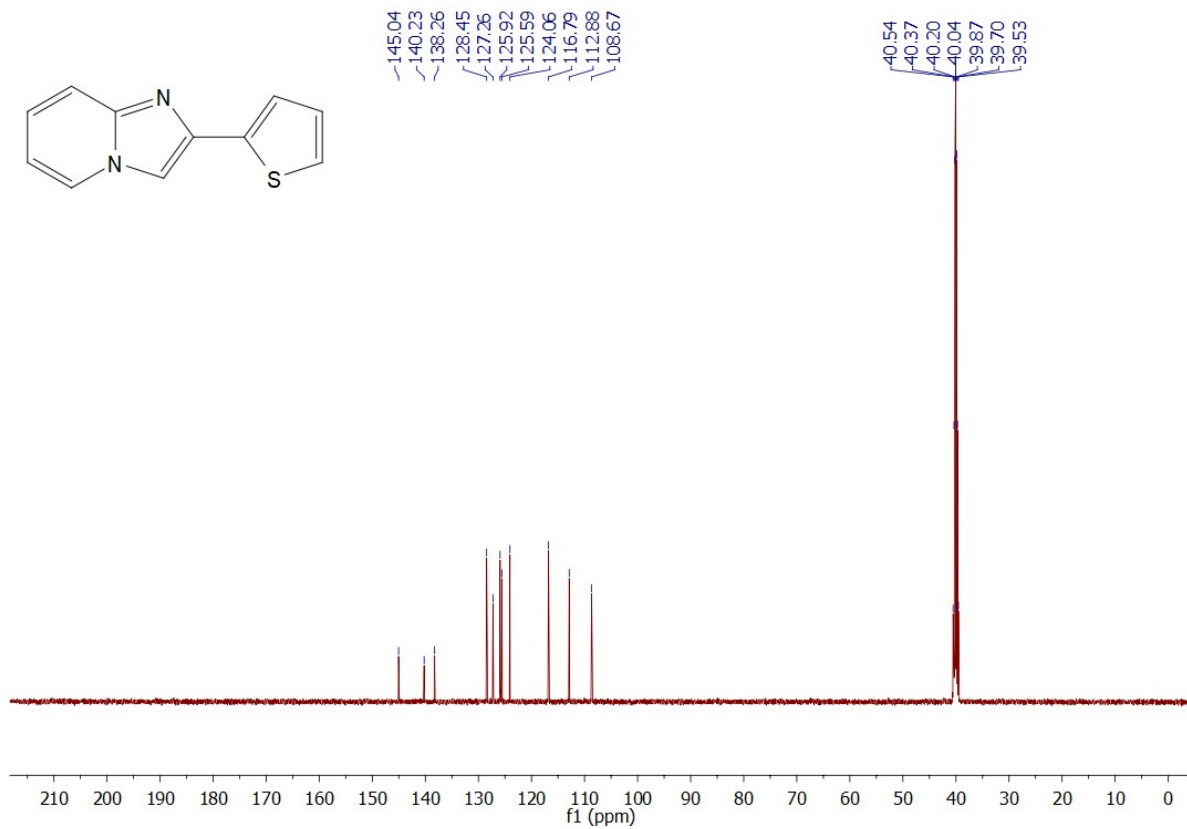

[3.12], (<sup>1</sup>H and <sup>13</sup>C NMR) of the 2-(Naphthalen-1-yl)imidazo[1,2-a]pyridine(3la)

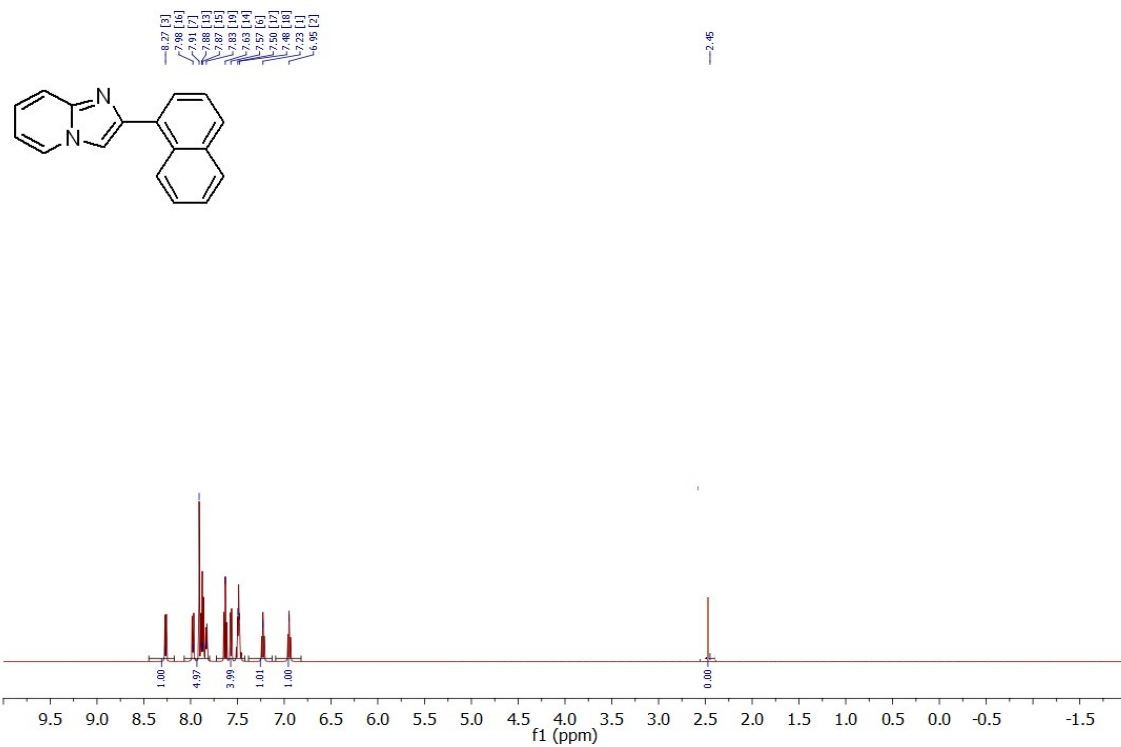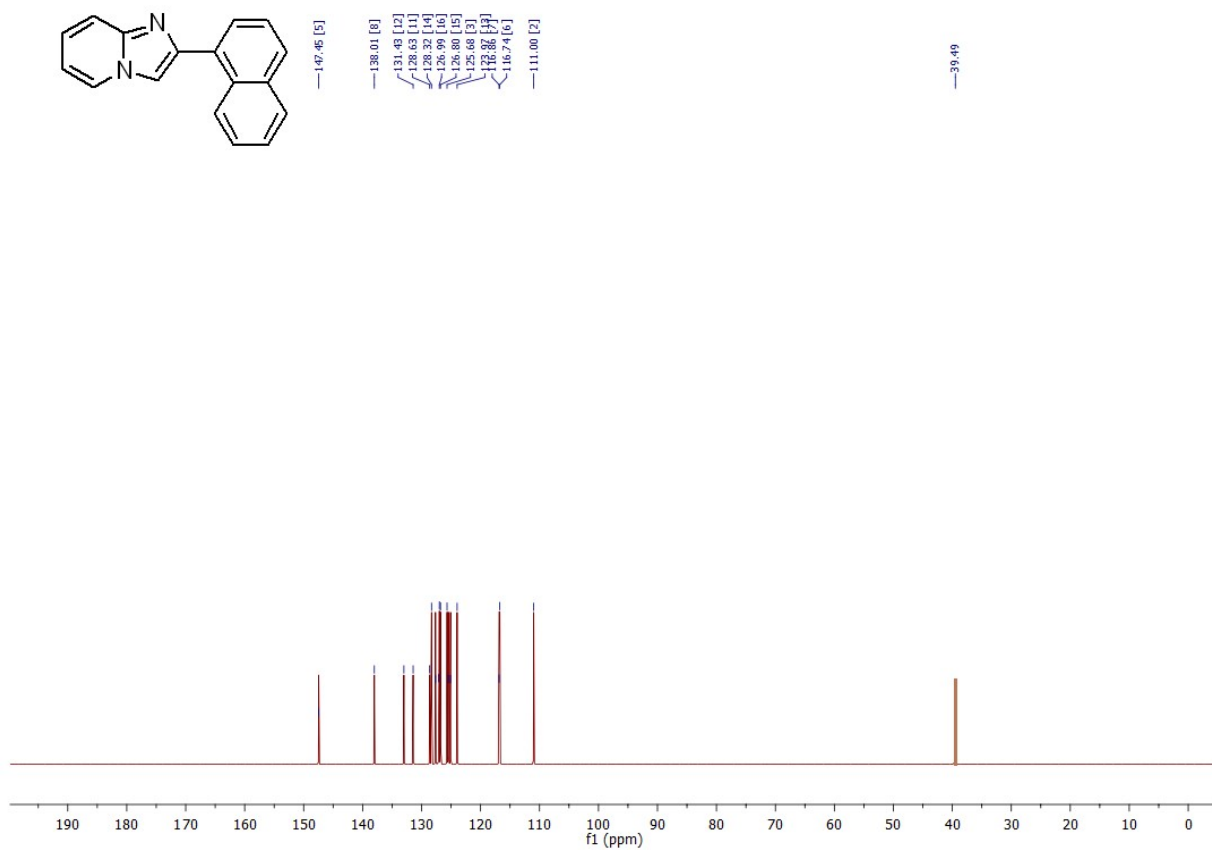

[3.13] (<sup>1</sup>H & <sup>13</sup>C NMR), of the 8-Methyl-2-phenylimidazo[1,2-a]pyridine (3ab)

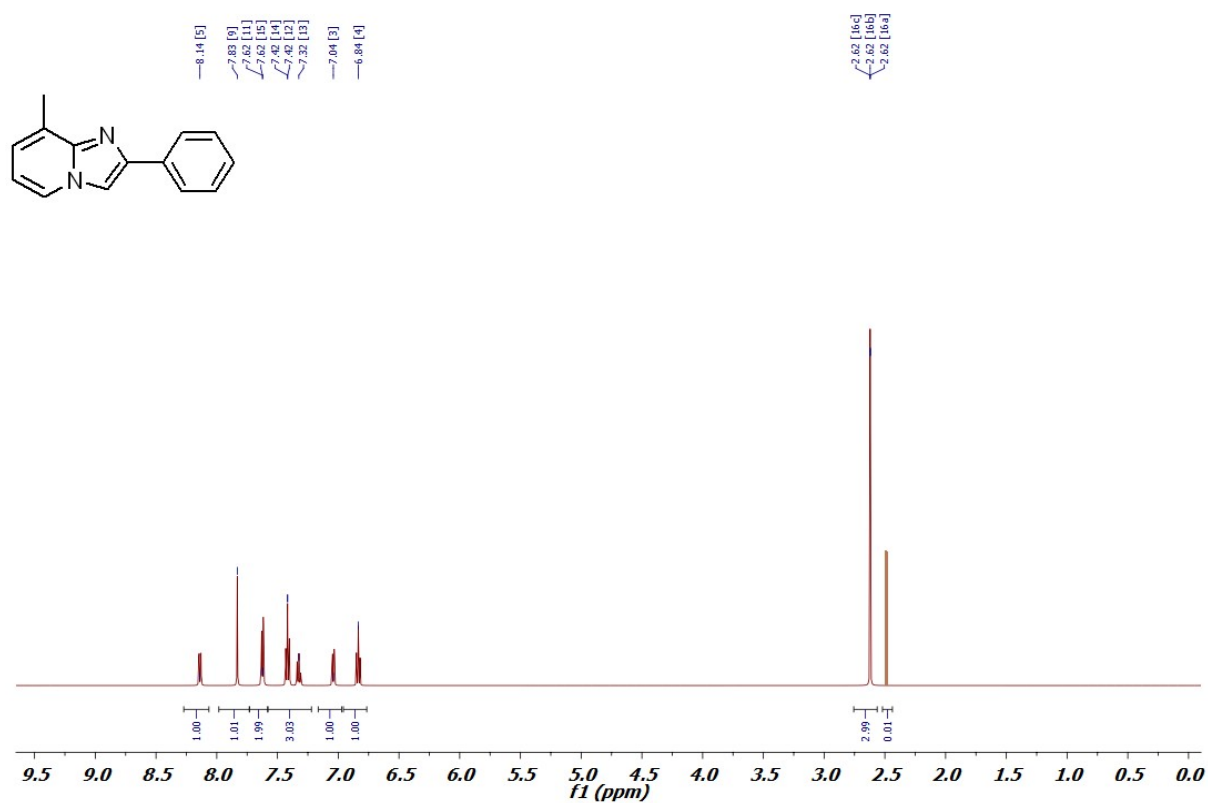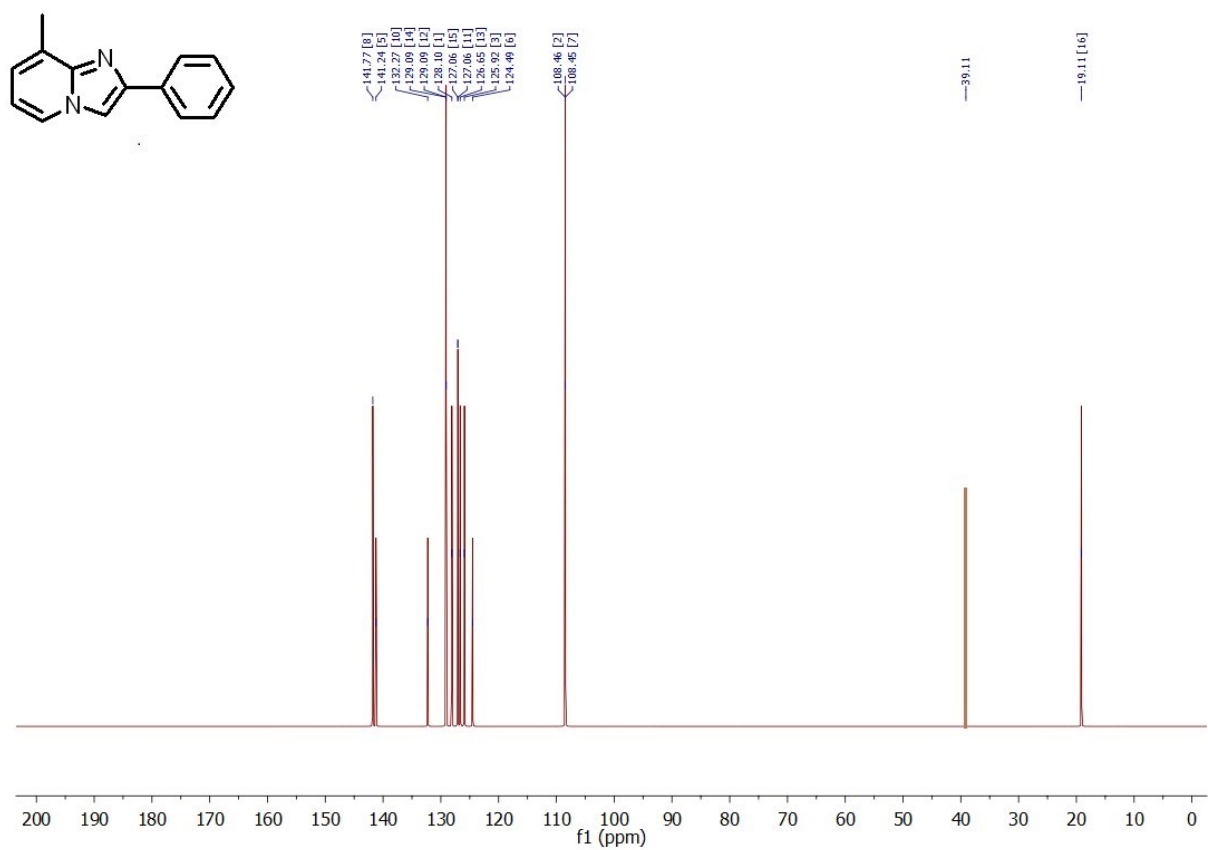

[3.14], (<sup>1</sup>H & <sup>13</sup>CNMR) of the 2-(4-Methoxyphenyl)-8-methylimidazo[1,2-a]pyridine(3cb)

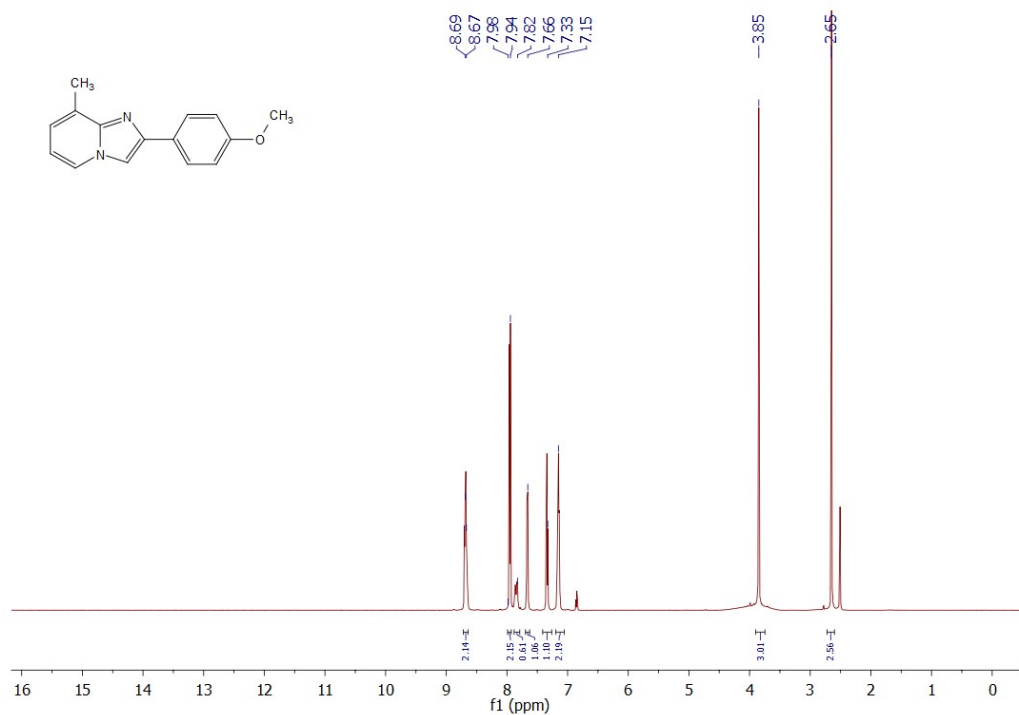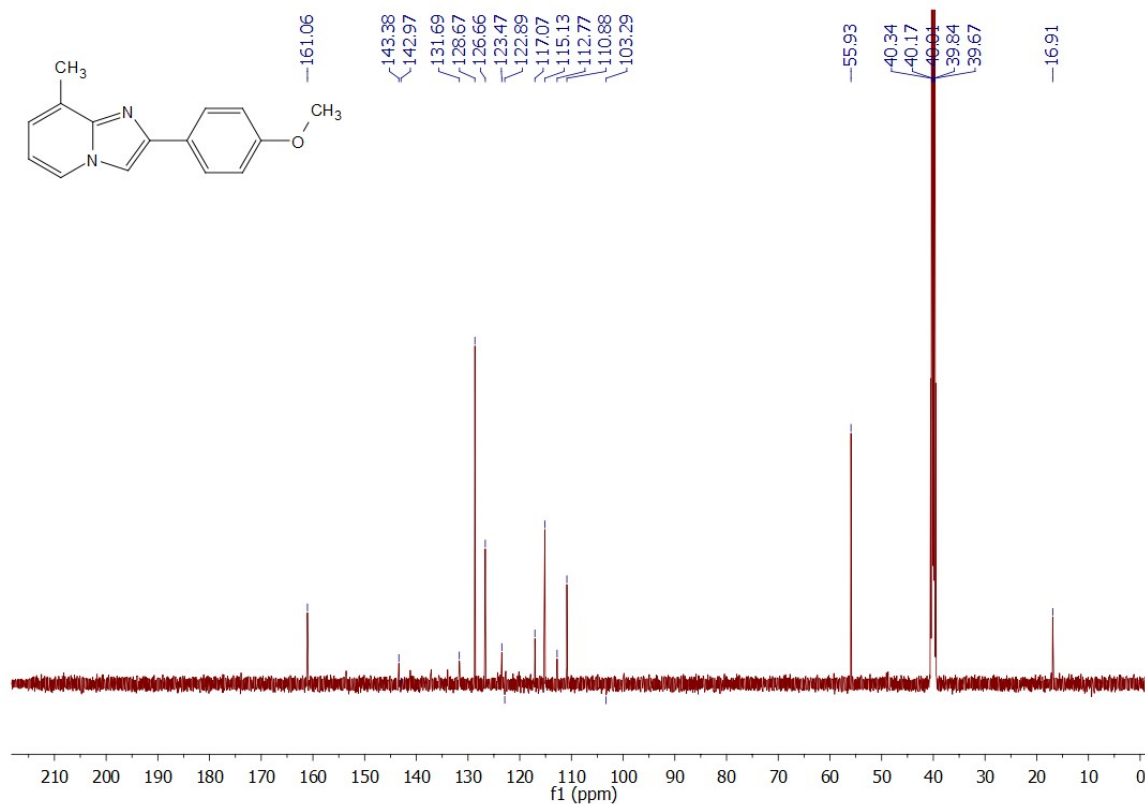

[3.15], (<sup>1</sup>H and <sup>13</sup>CNMR) of the 8-Methyl-2-(3-nitrophenyl)imidazo[1,2-a]pyridine, (3db)

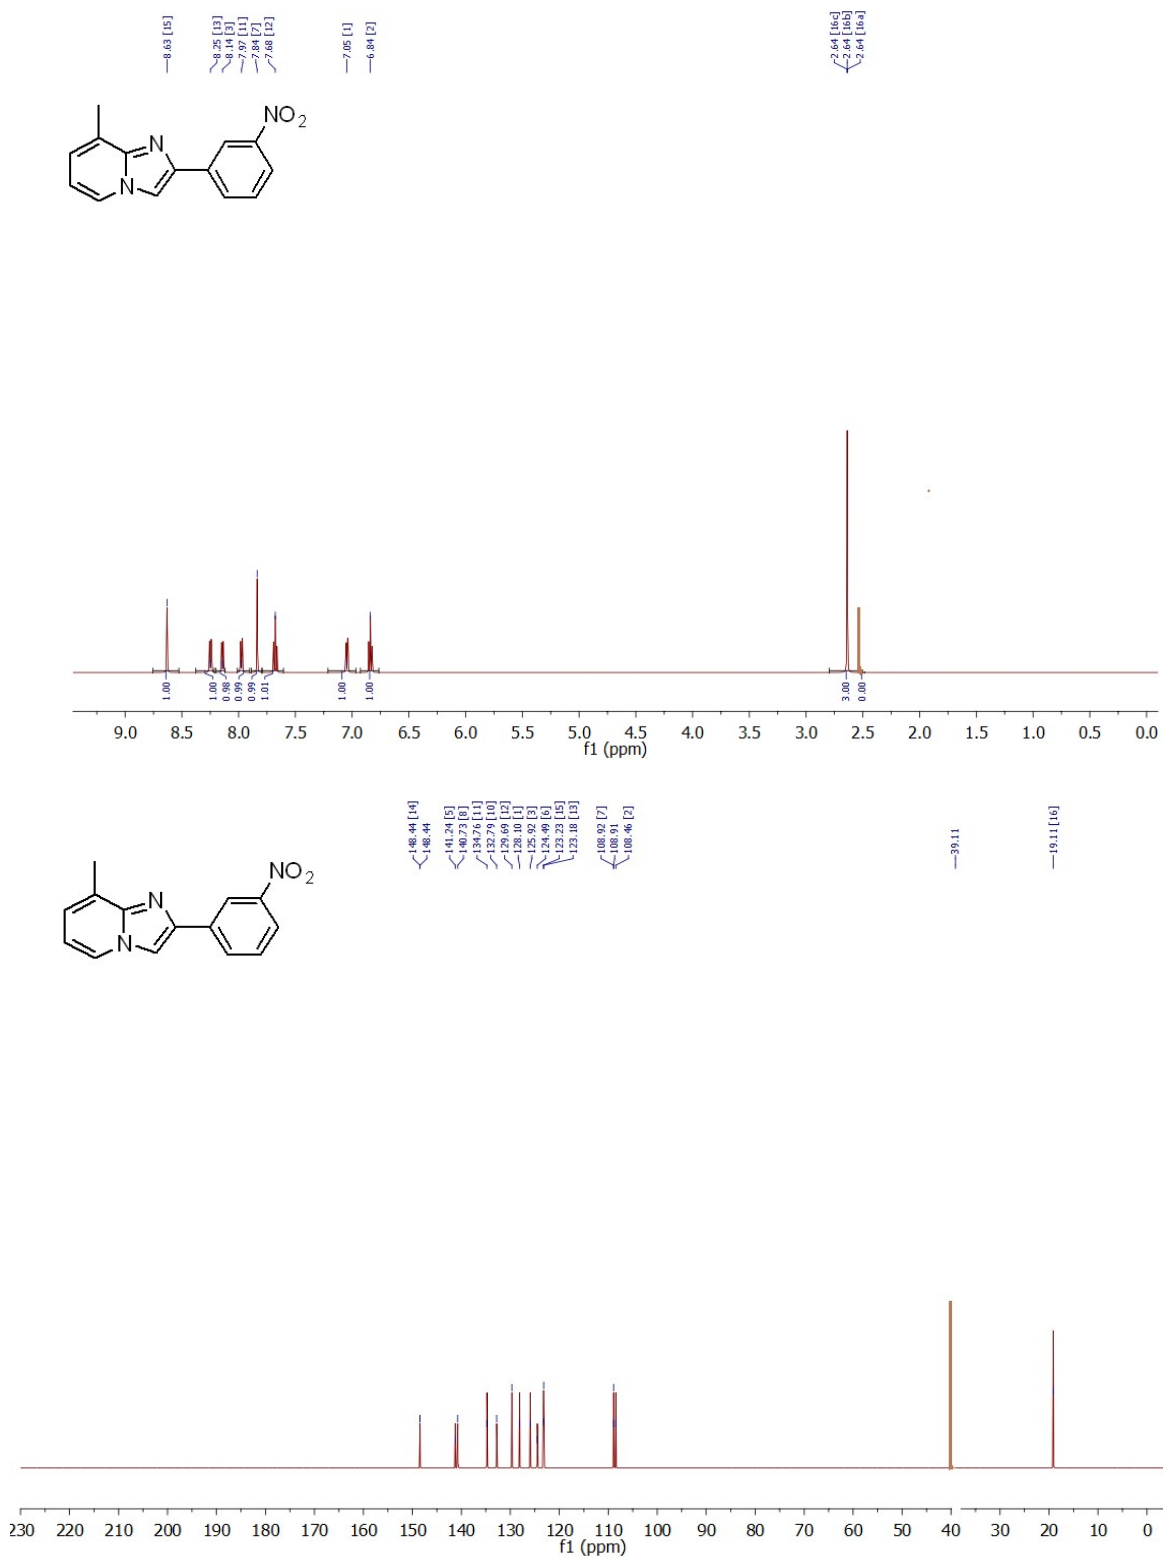

[3.16] ( $^1\text{H}$  &  $^{13}\text{C}$  NMR), of the 2-(4-Chlorophenyl)-8-methylimidazo[1,2-a]pyridine (3eb)

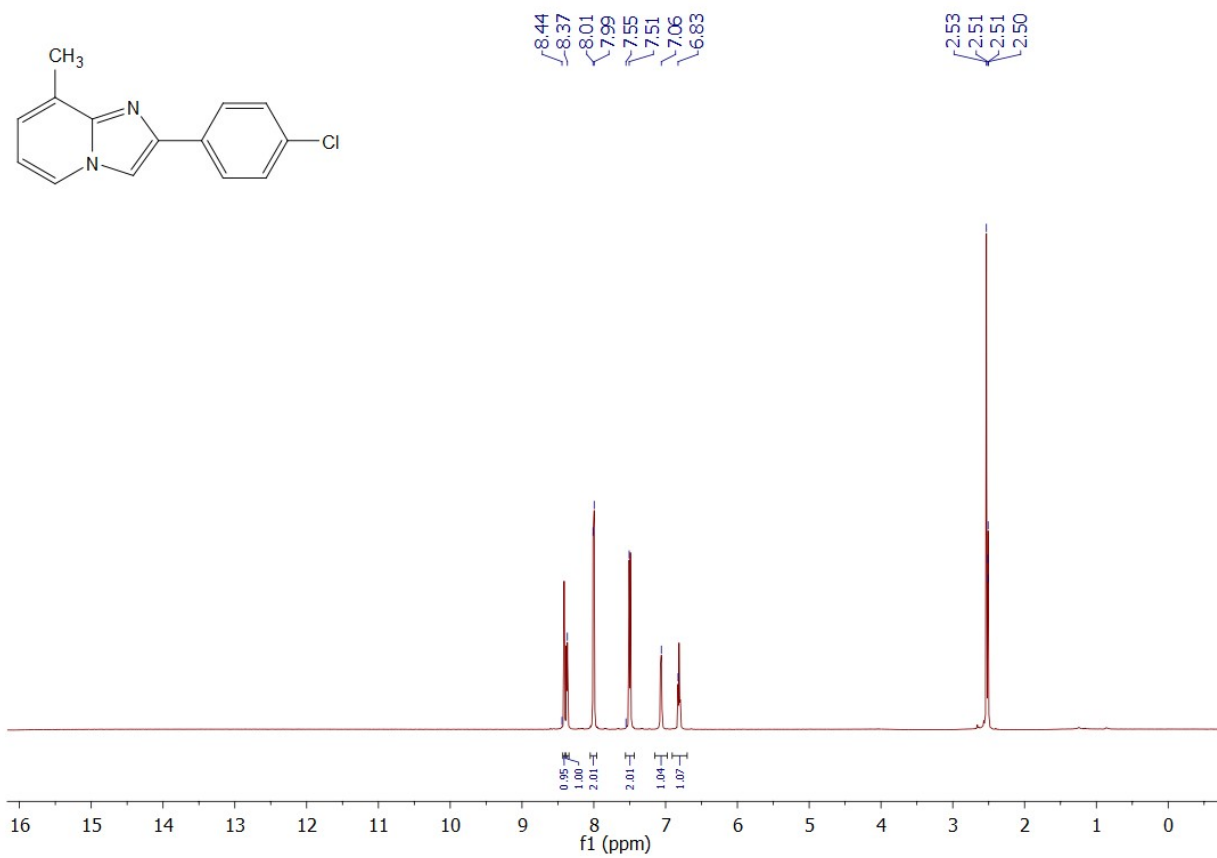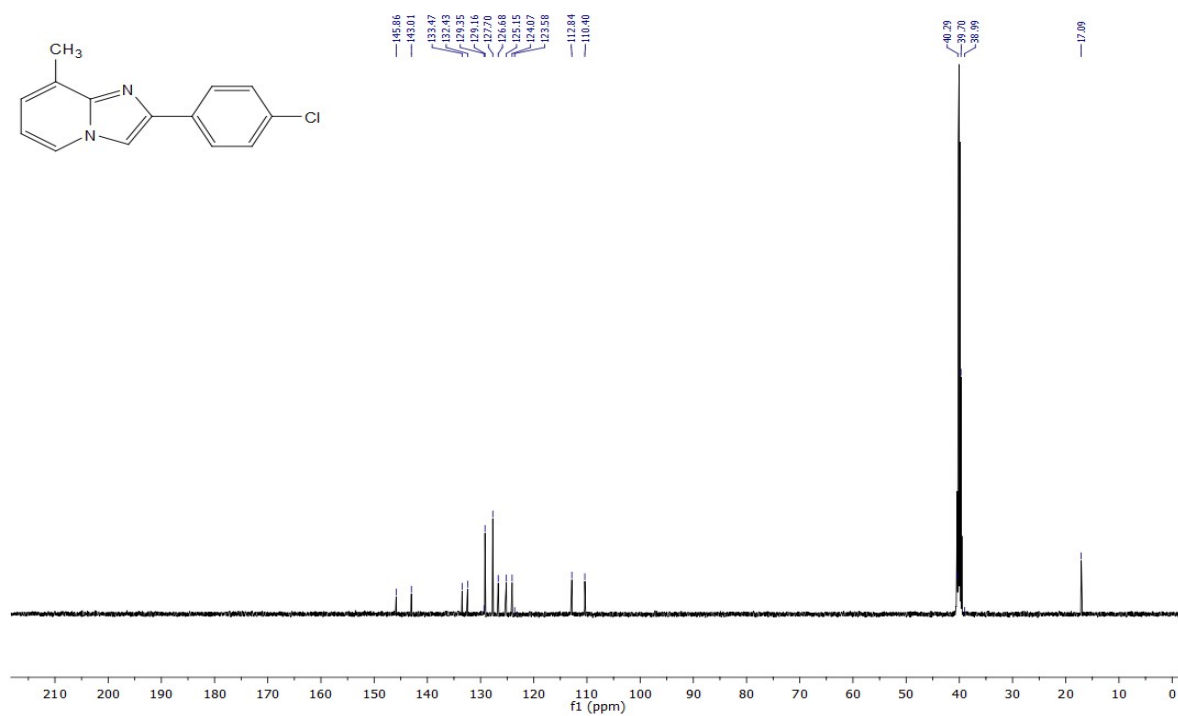



[3.17] (<sup>1</sup>H & <sup>13</sup>C NMR), of the 2-(4-Bromophenyl)-8-methylimidazo[1,2-a]pyridine (3fb)

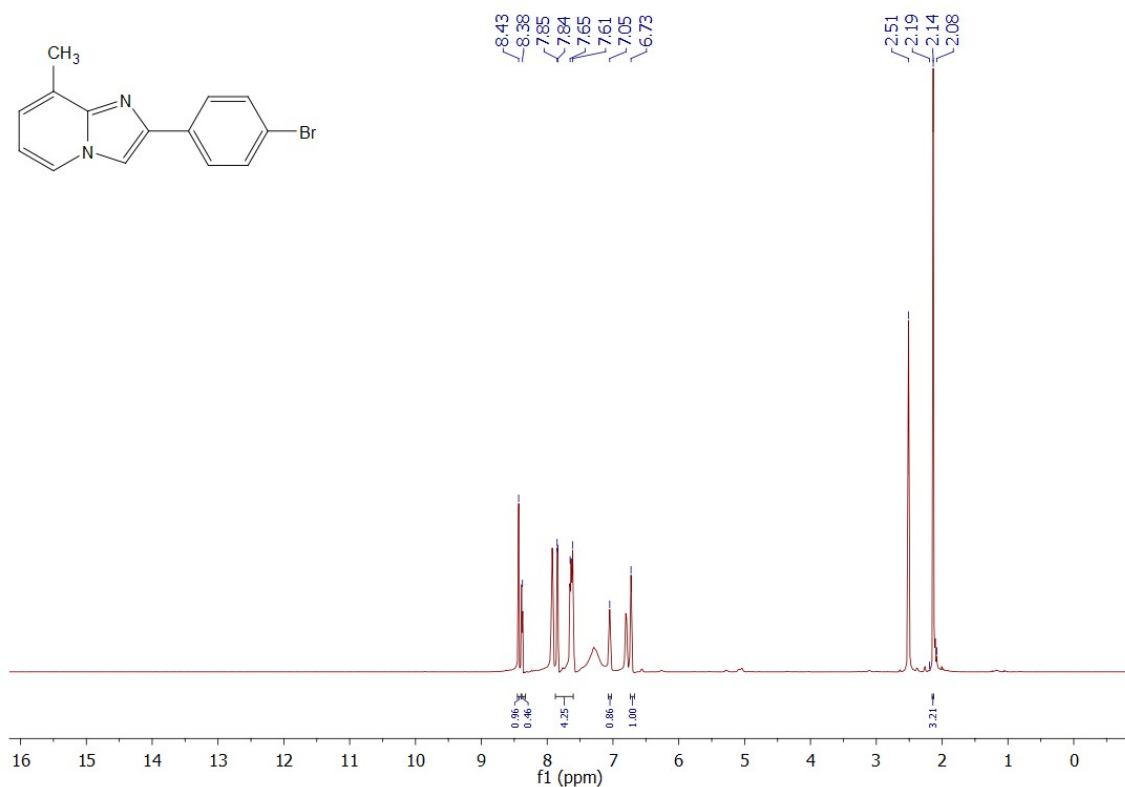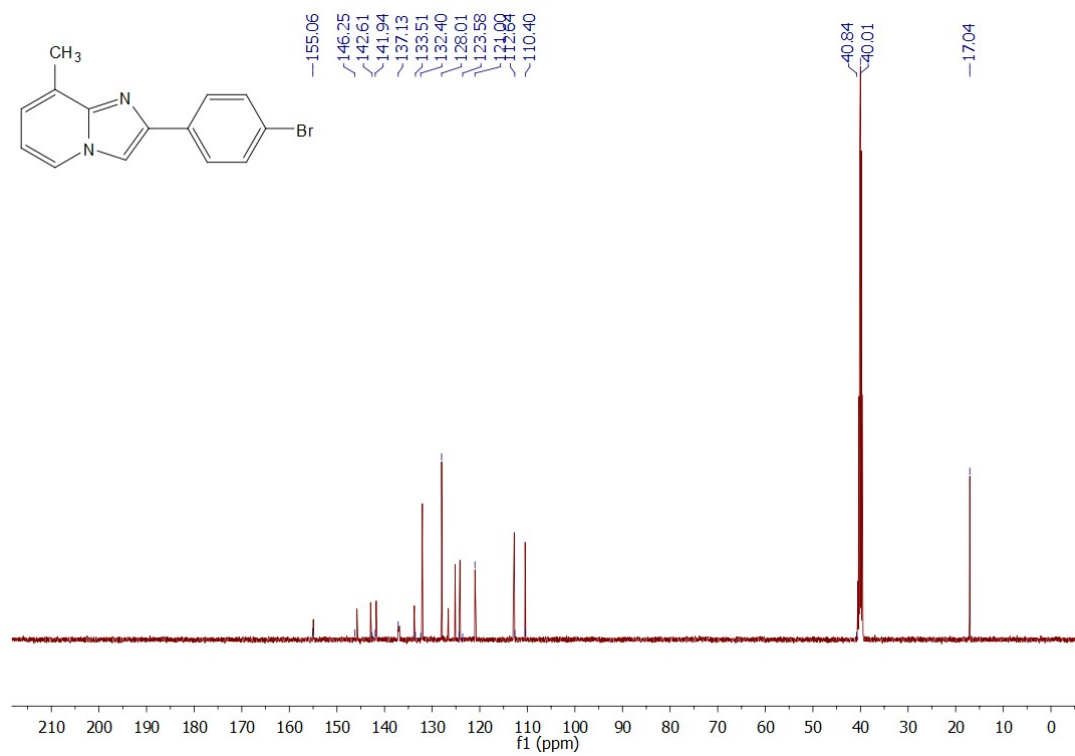

[3.18]  $^1\text{H}$  &  $^{13}\text{C}$  NMR, of the 2-(4-Fluorophenyl)-8-methylimidazo[1,2-a]pyridine (3gb)

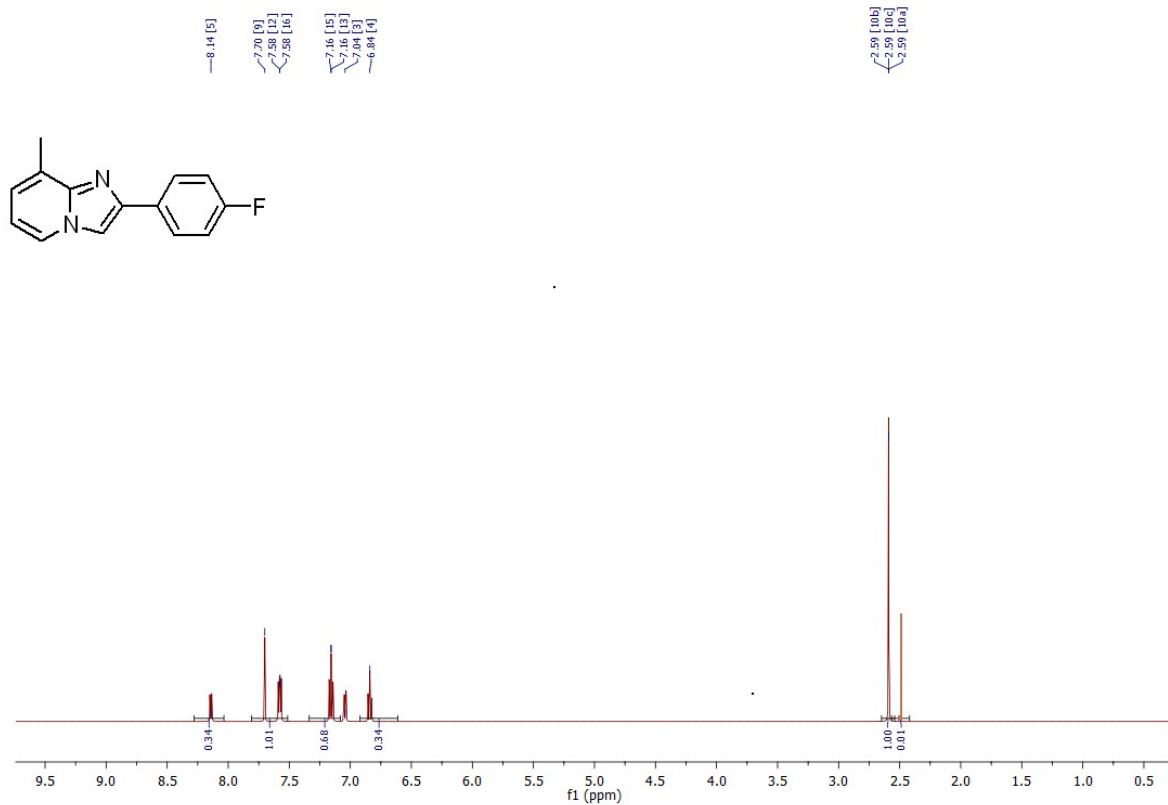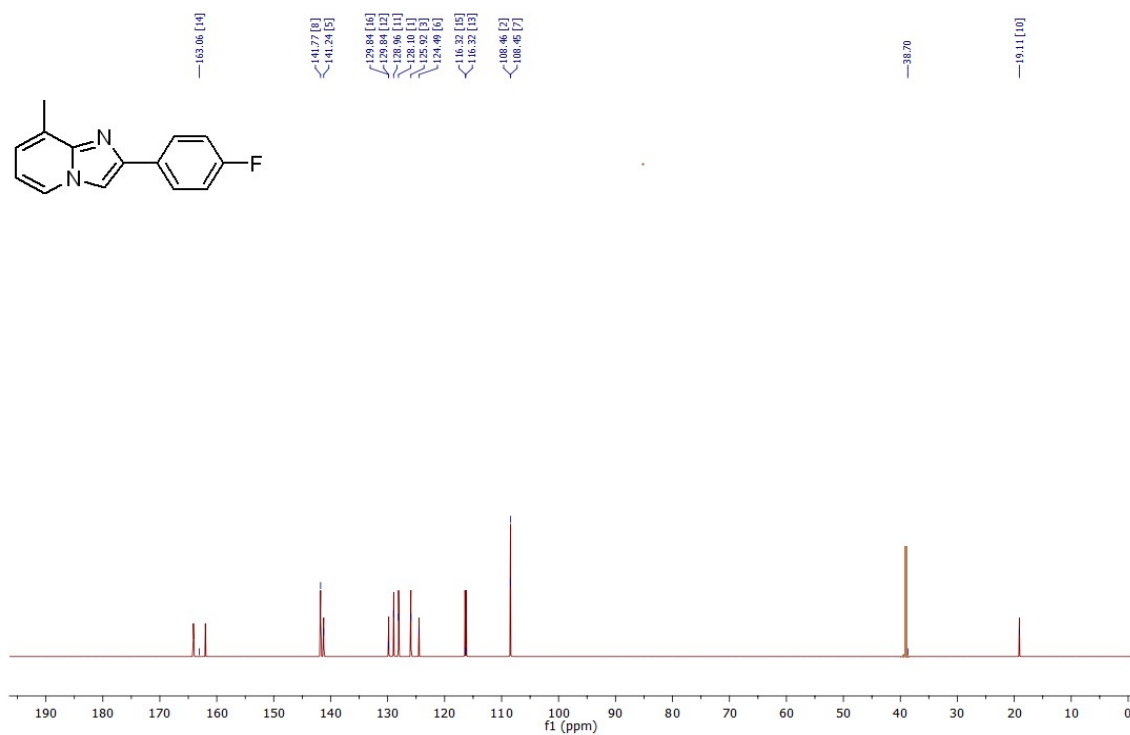

[3.18] HRMS &  $^{19}\text{F}$  NMR of the 2-(4-Fluorophenyl) imidazo[1,2-a] pyridine(3gb)

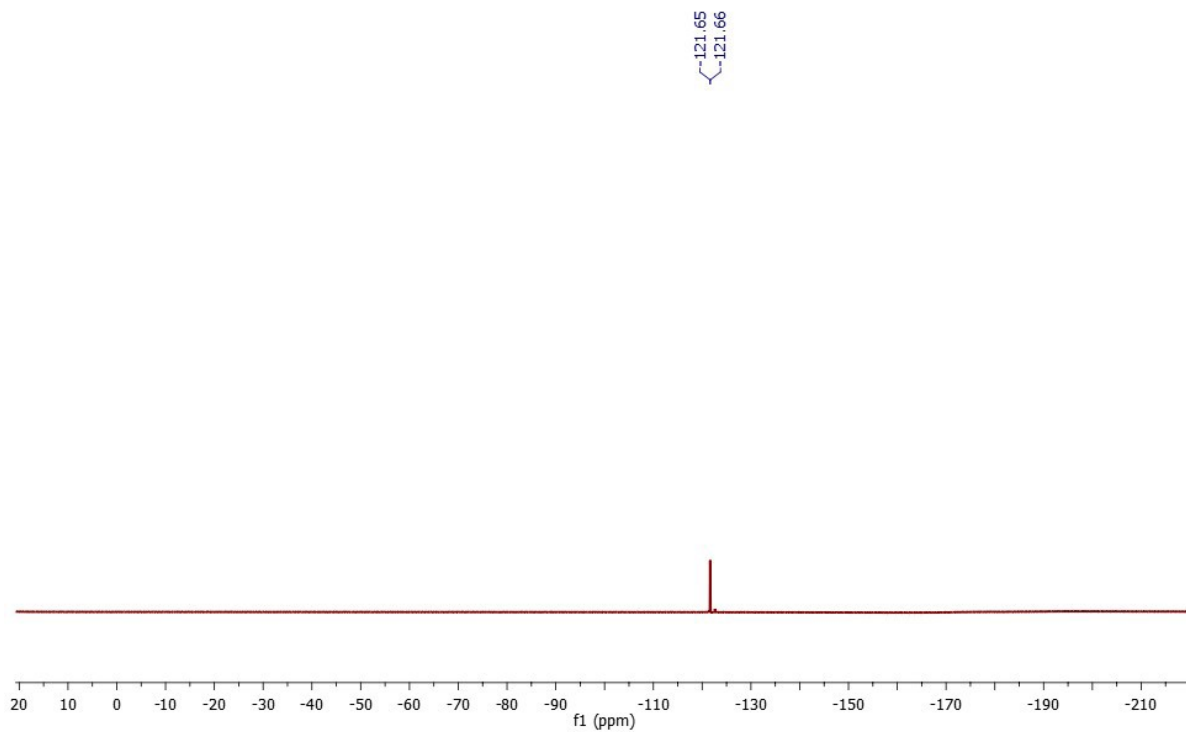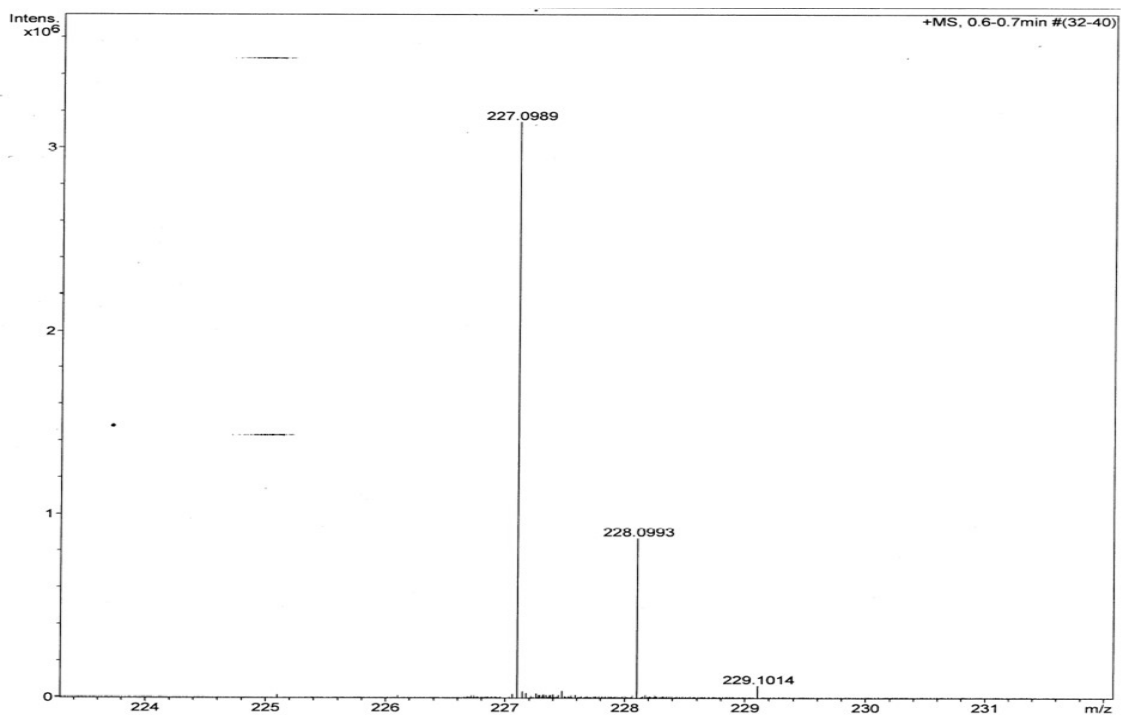

[3.19] (<sup>1</sup>H & <sup>13</sup>C NMR) of the,2-(8-Methylimidazo[1,2-a]pyridin-2-yl) phenol, (3hb) :

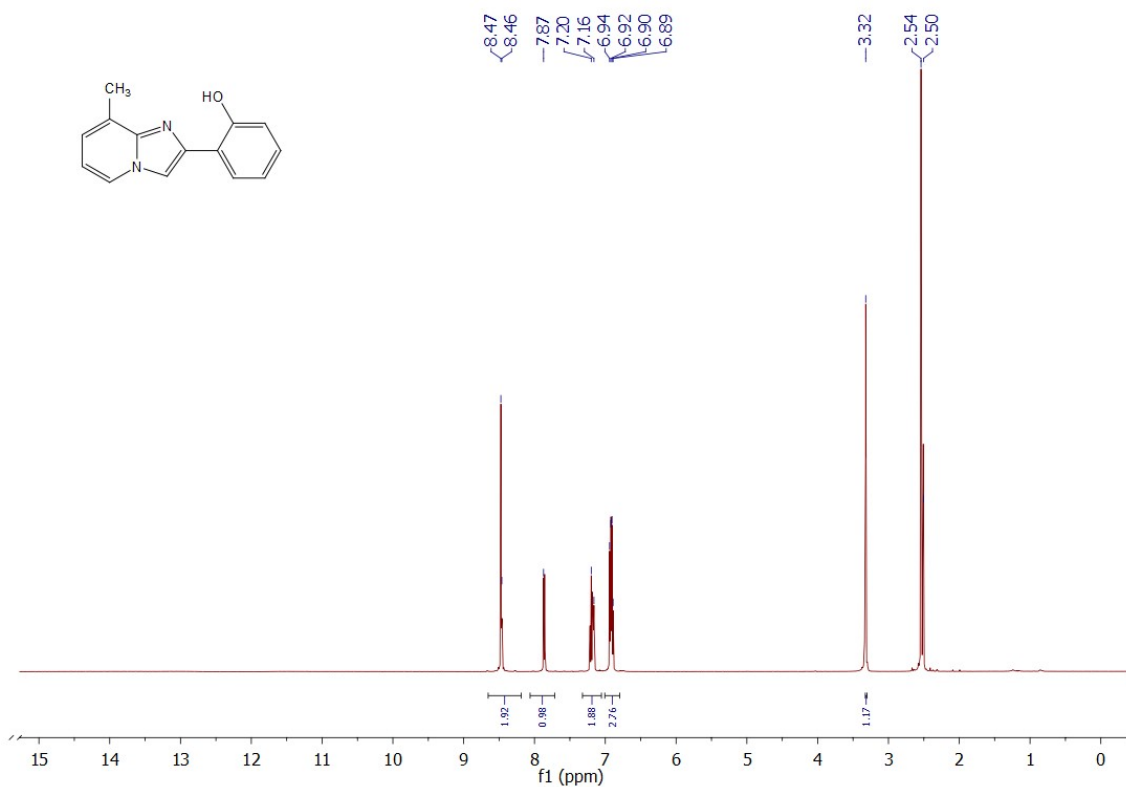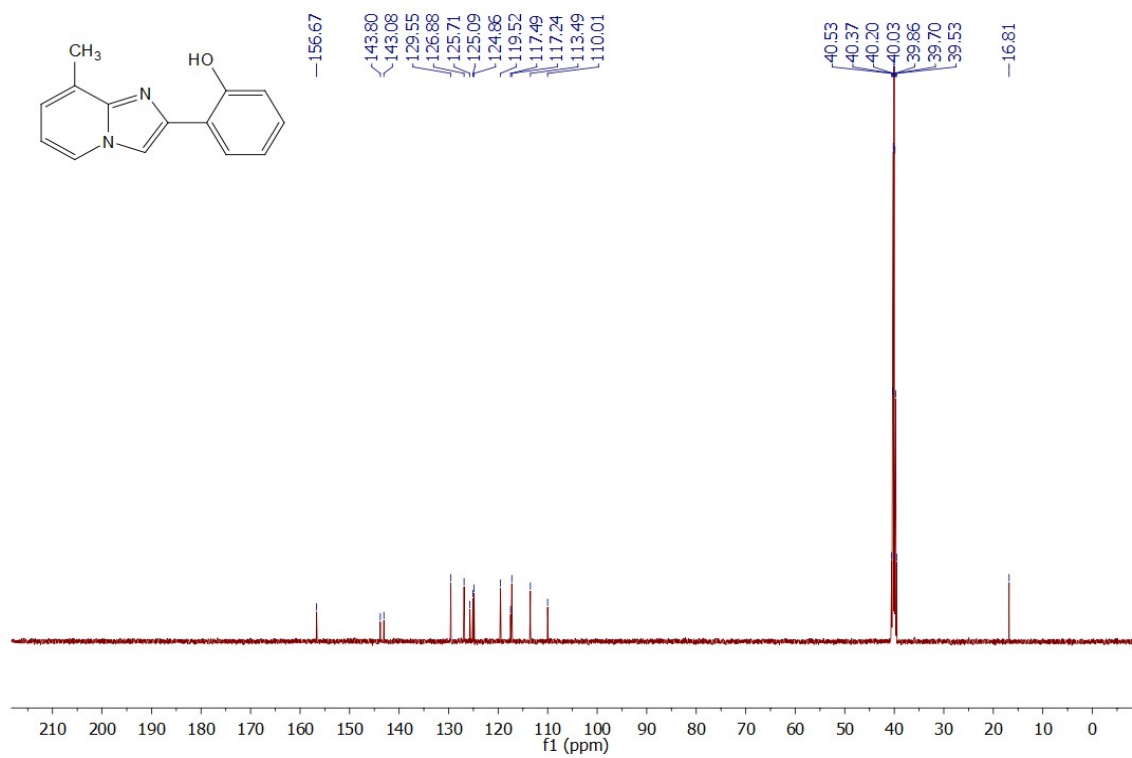

[3.20], ( $^1\text{H}$  &  $^{13}\text{C}$  NMR) of the [4-(8-Methylimidazo[1,2-a] pyridin-2-yl)phenol (3ib)

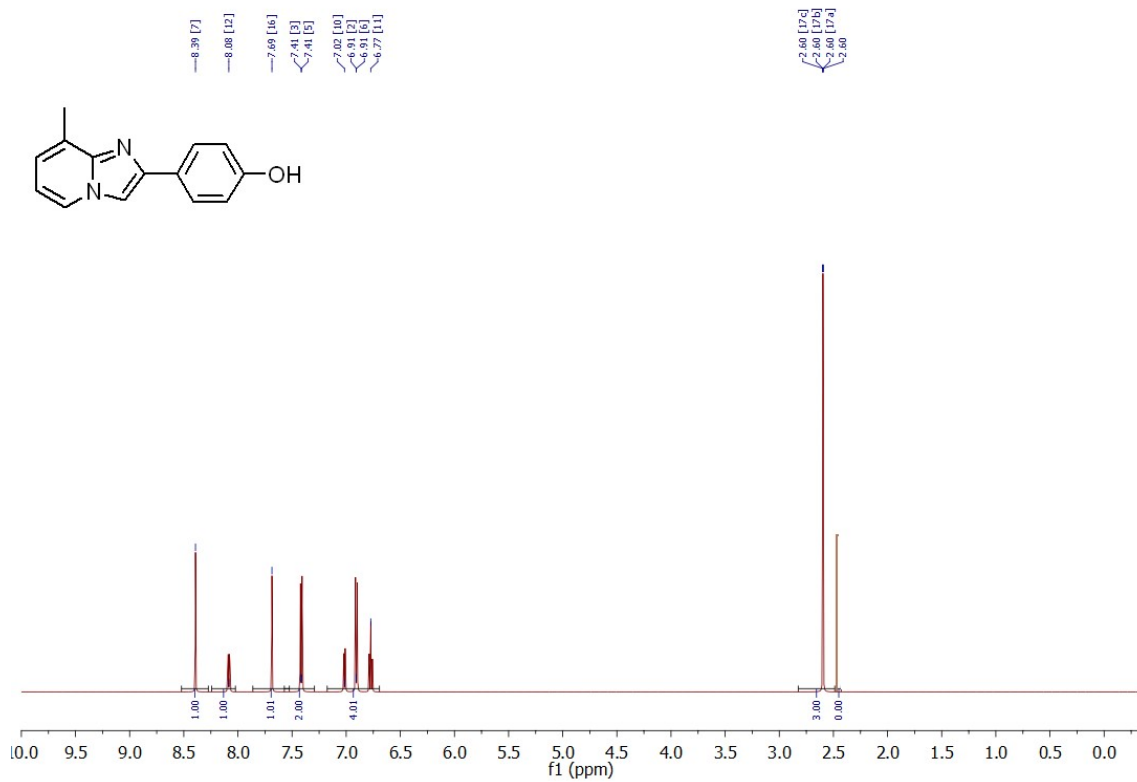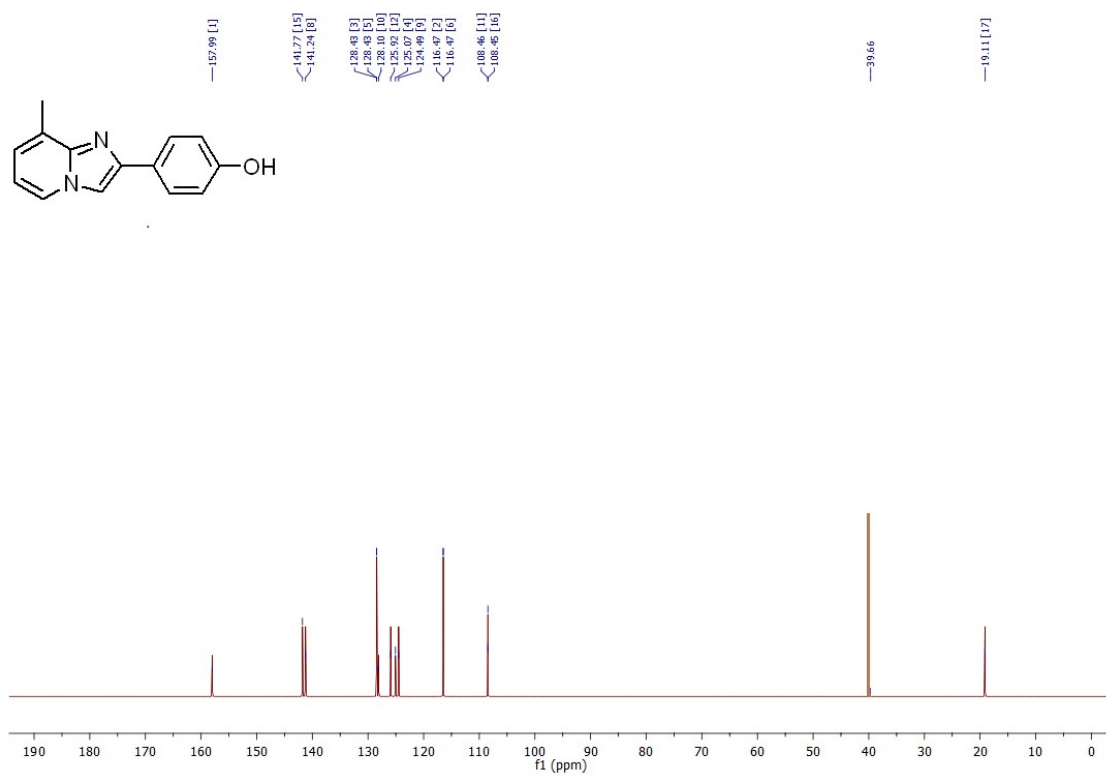

[3.21], (<sup>1</sup>H and <sup>13</sup>C NMR) of the 6-Chloro-2-phenylimidazo[1,2-a]pyridine, (3ac):

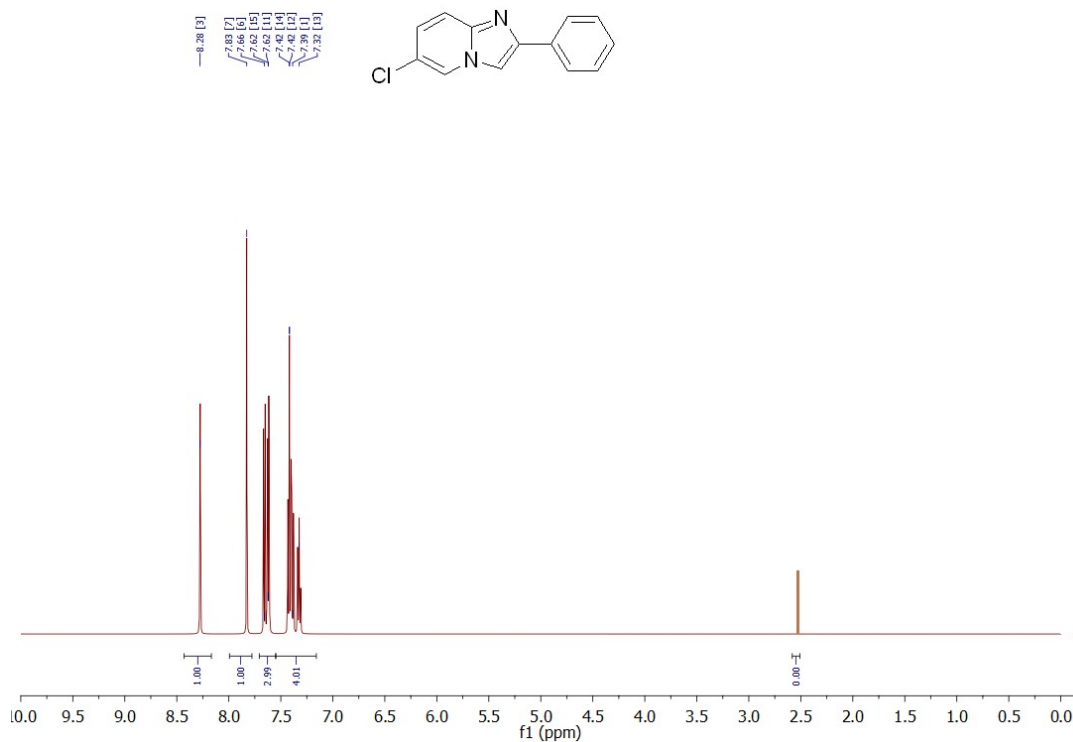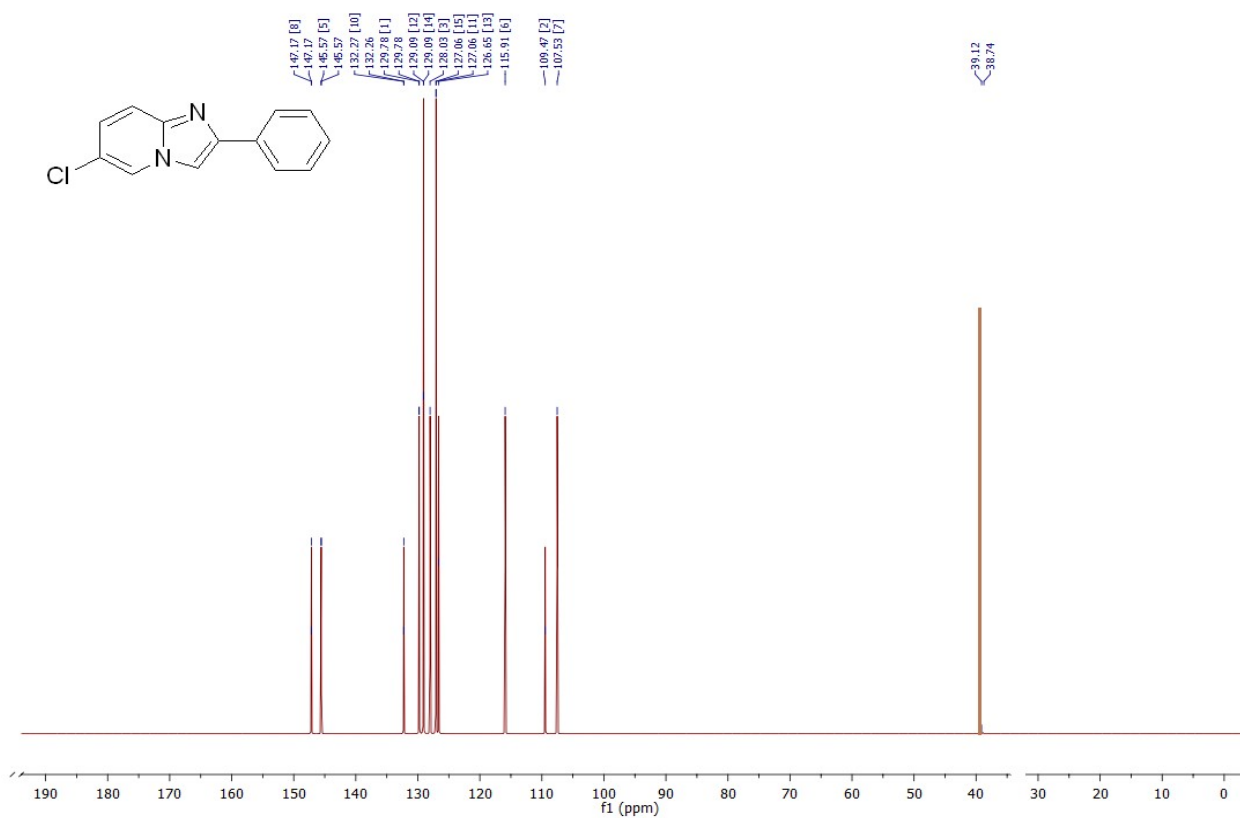

[3.22], <sup>1</sup>H & <sup>13</sup>C of the NMR 2-(4-Bromophenyl)-6-chloroimidazo[1,2-a] pyridine, (3fc)

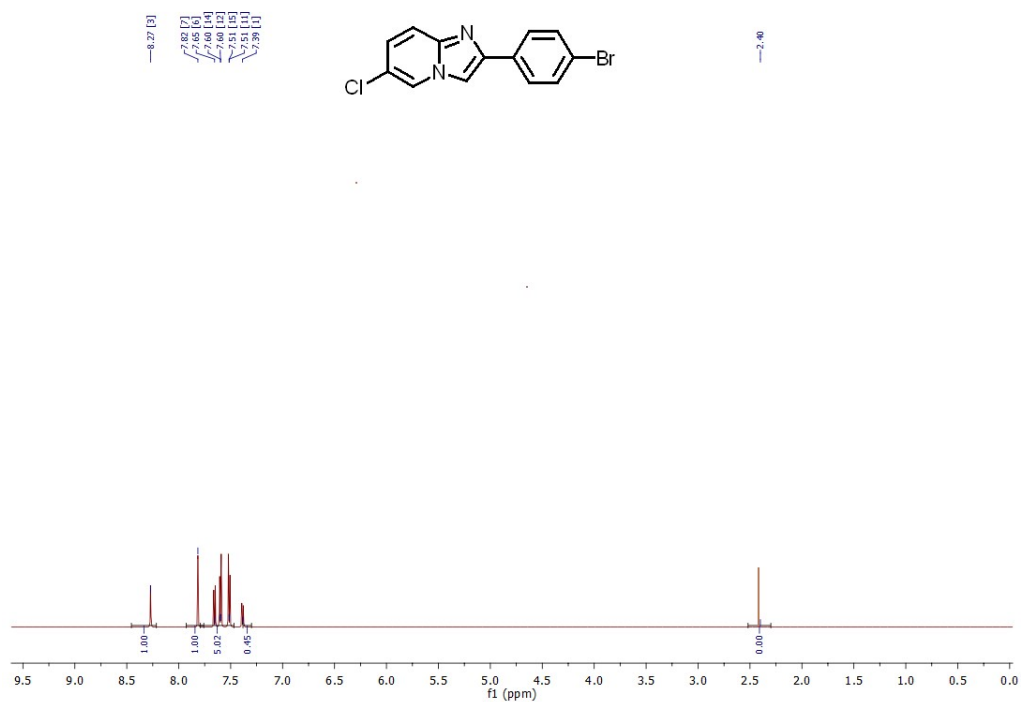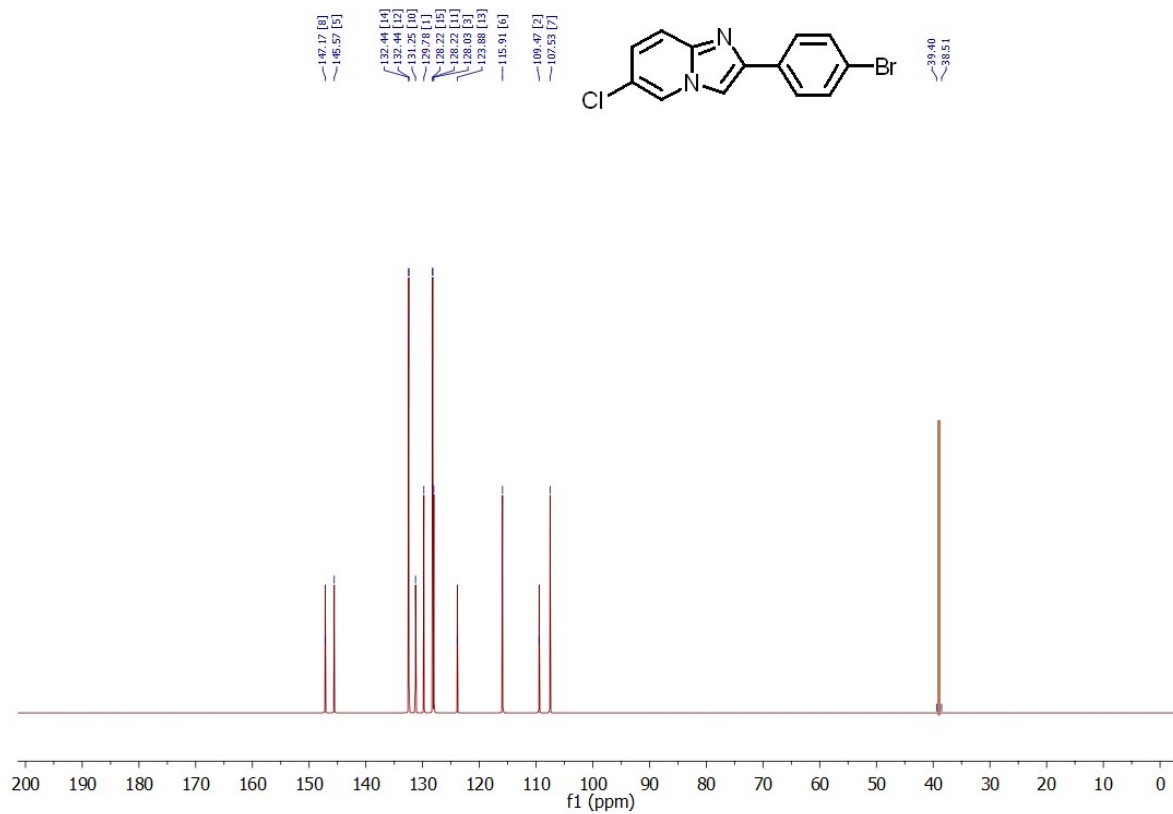

[3.23], (<sup>1</sup>H and <sup>13</sup>C the of the NMR) 6-Chloro-2-(p-tolyl)imidazo[1,2-a]pyridine ,(3bc):

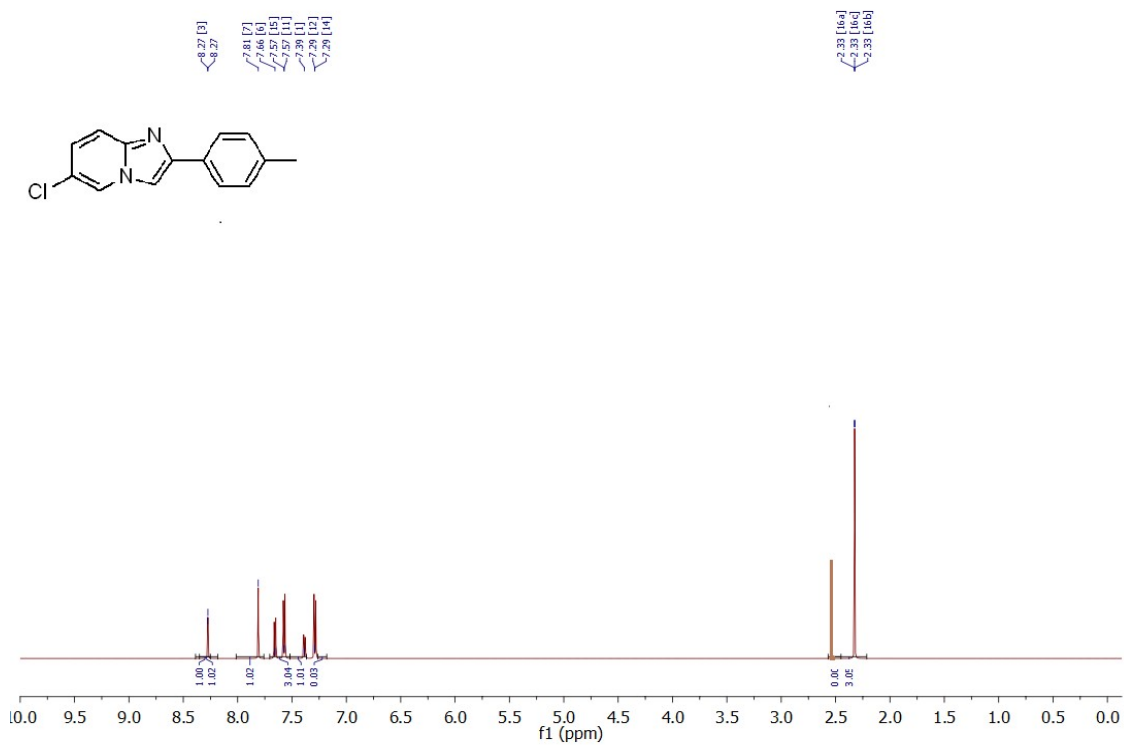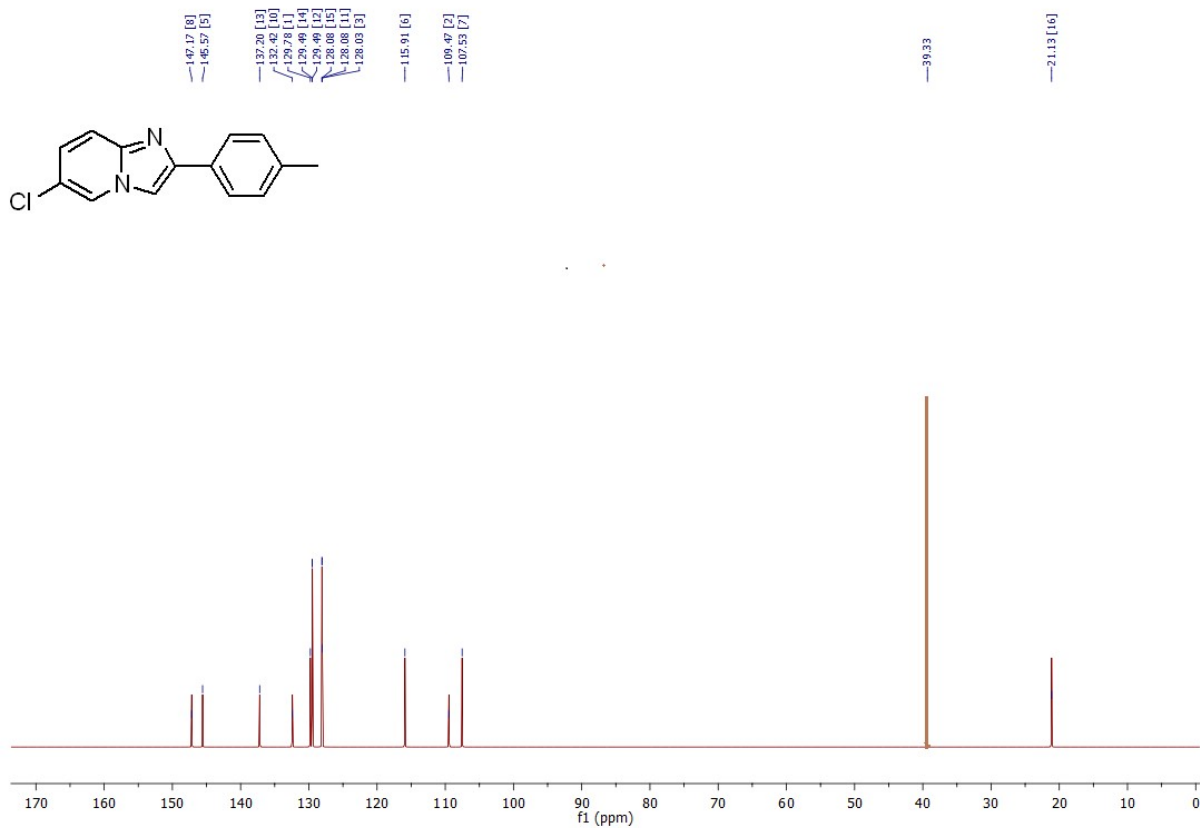



[3.24] ( $^1\text{H}$  and  $^{13}\text{C}$ , of the NMR 6-Chloro-2-(4-chlorophenyl)imidazo[1,2-a]pyridine(3ec):

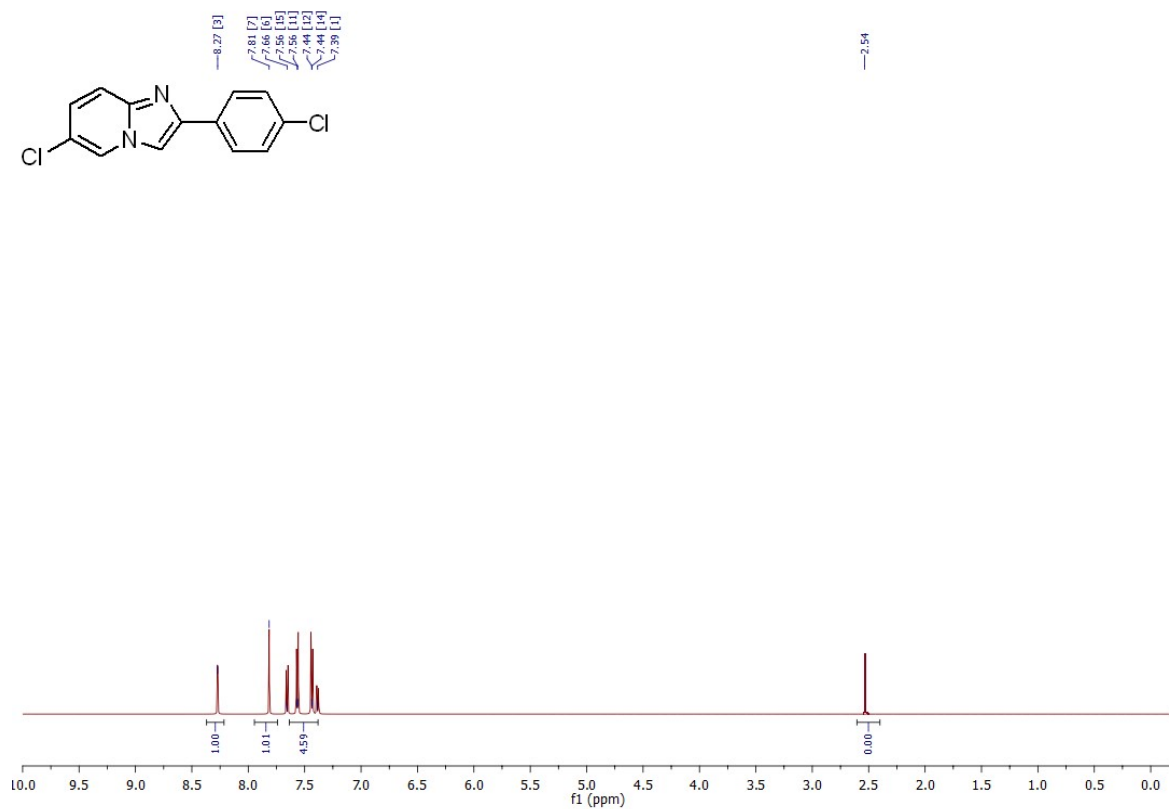

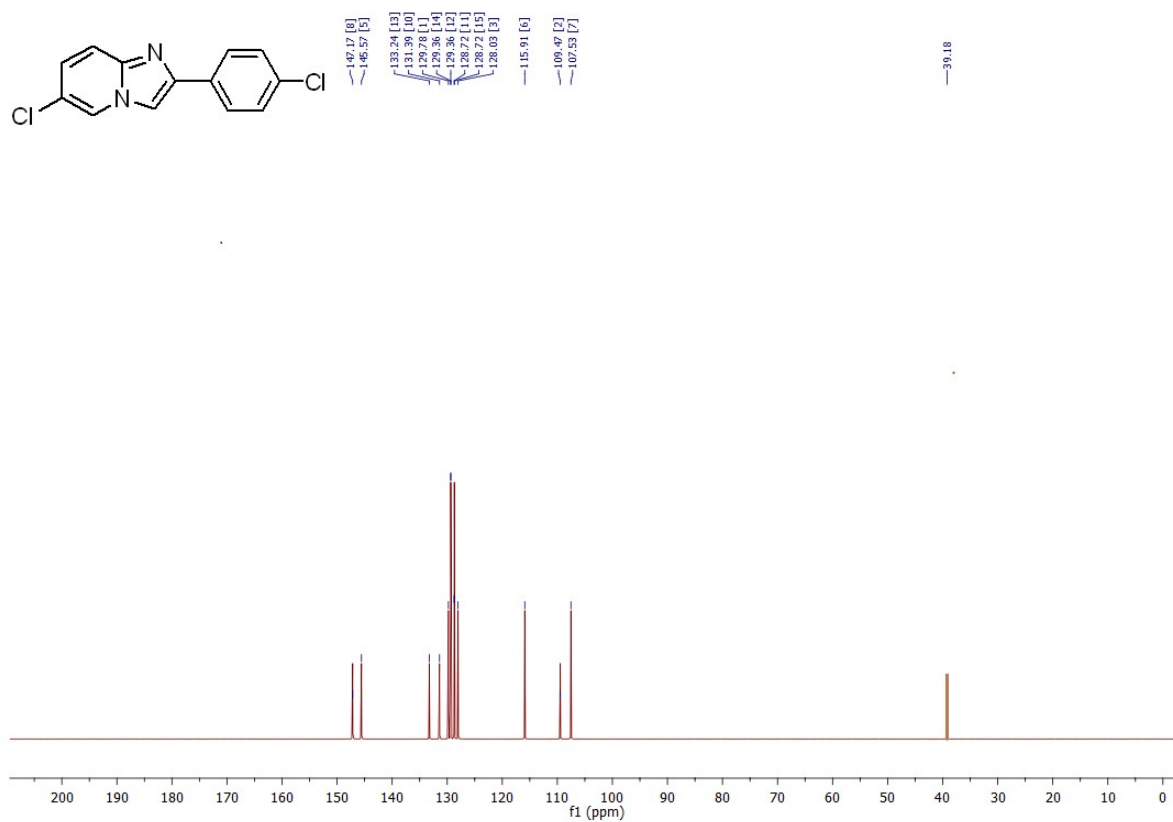

**[3.25] <sup>1</sup>H and <sup>13</sup>C of the NMR,2-(6-Chloroimidazo[1,2-a]pyridin-2-yl)phenol (3hc):**

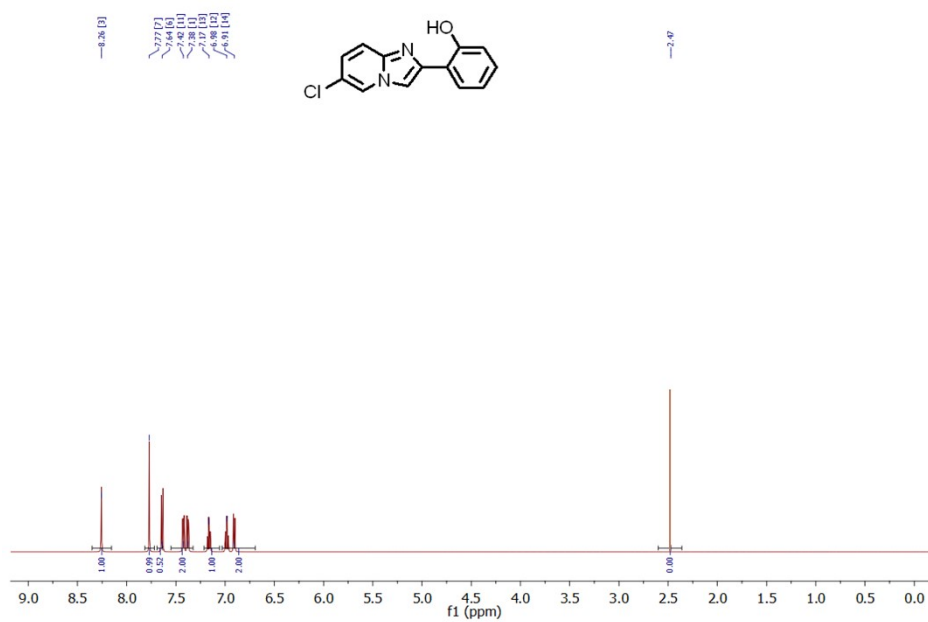

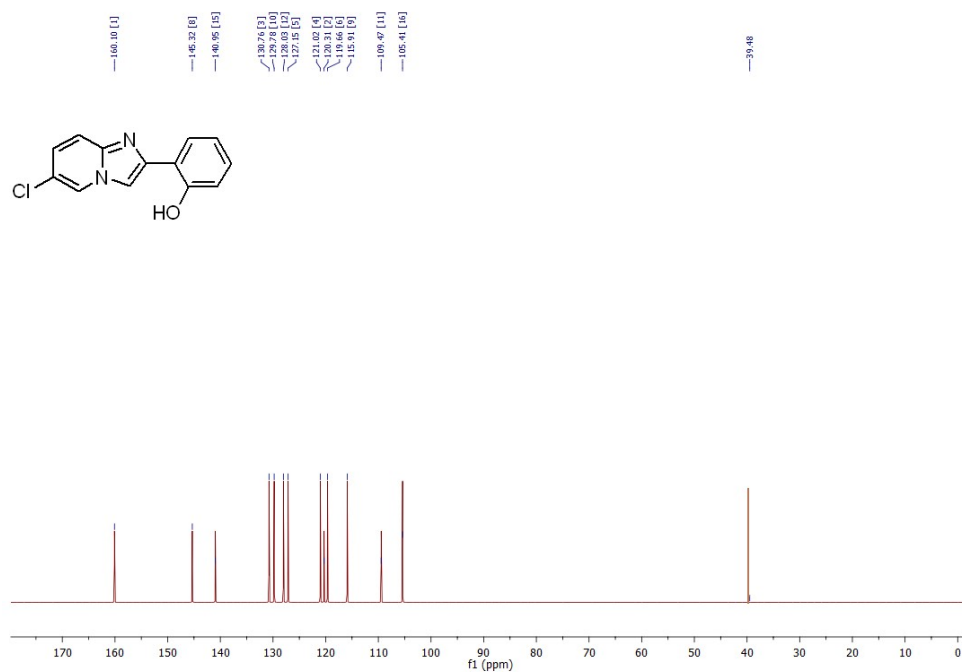

### [3.26] (<sup>1</sup>H and <sup>13</sup>C NMR) of the (Phenoxymethyl)-2-phenylimidazo[1,2-a]pyridine (3ad)

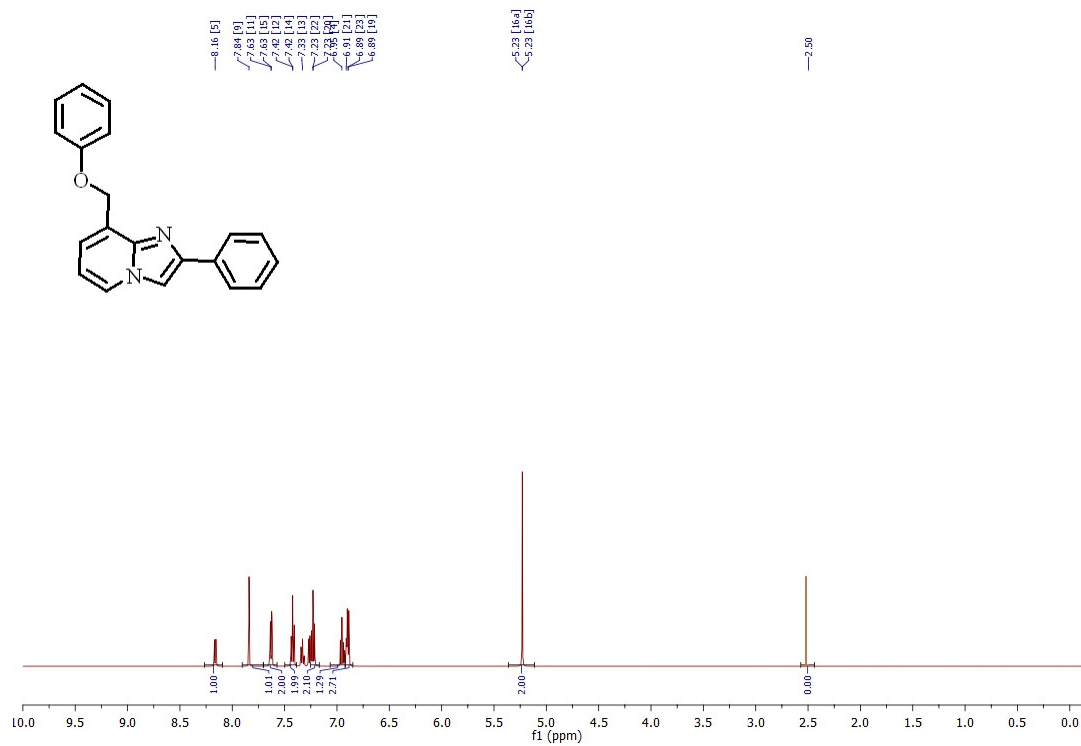

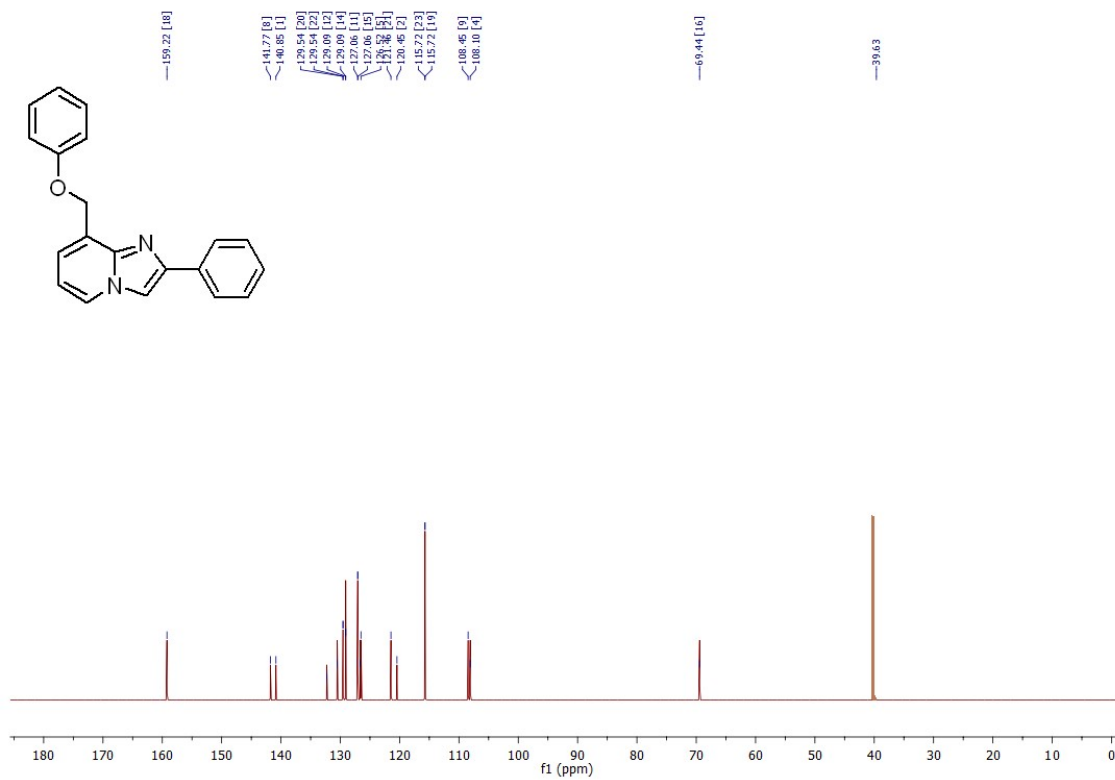

**[3.27] <sup>1</sup>H and <sup>13</sup>C NMR of the 2-methylimidazo[1,2-a] pyridine of (3ae)**

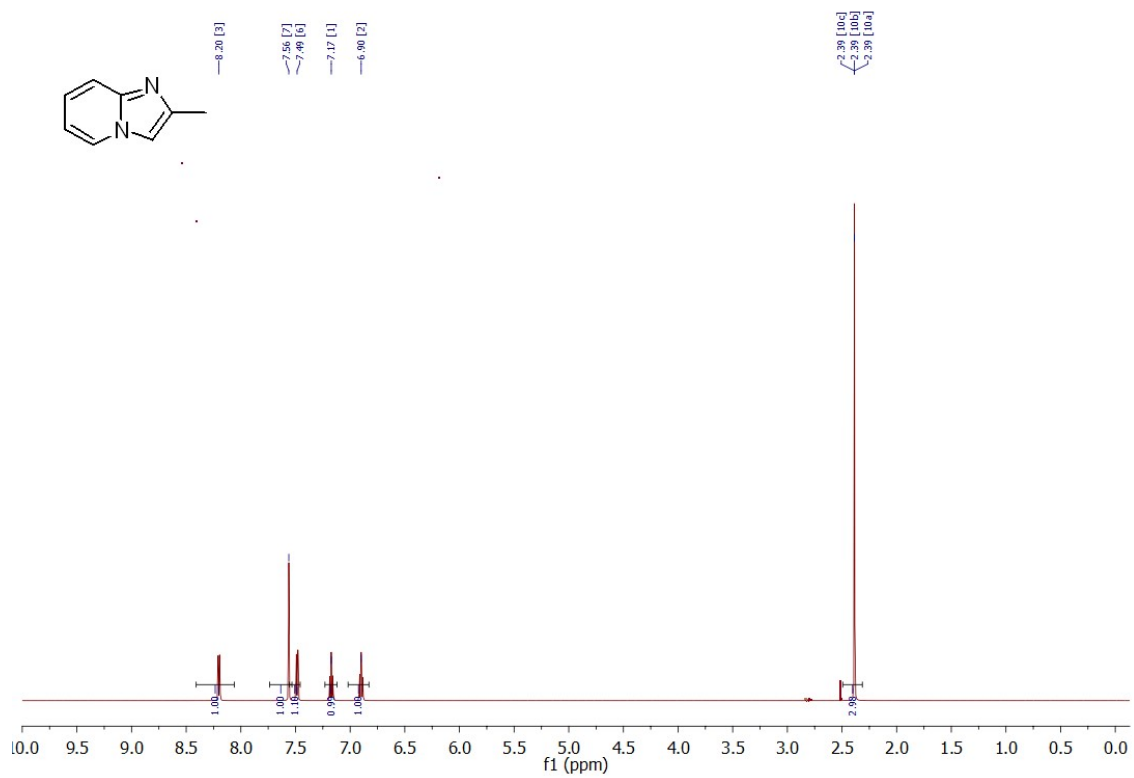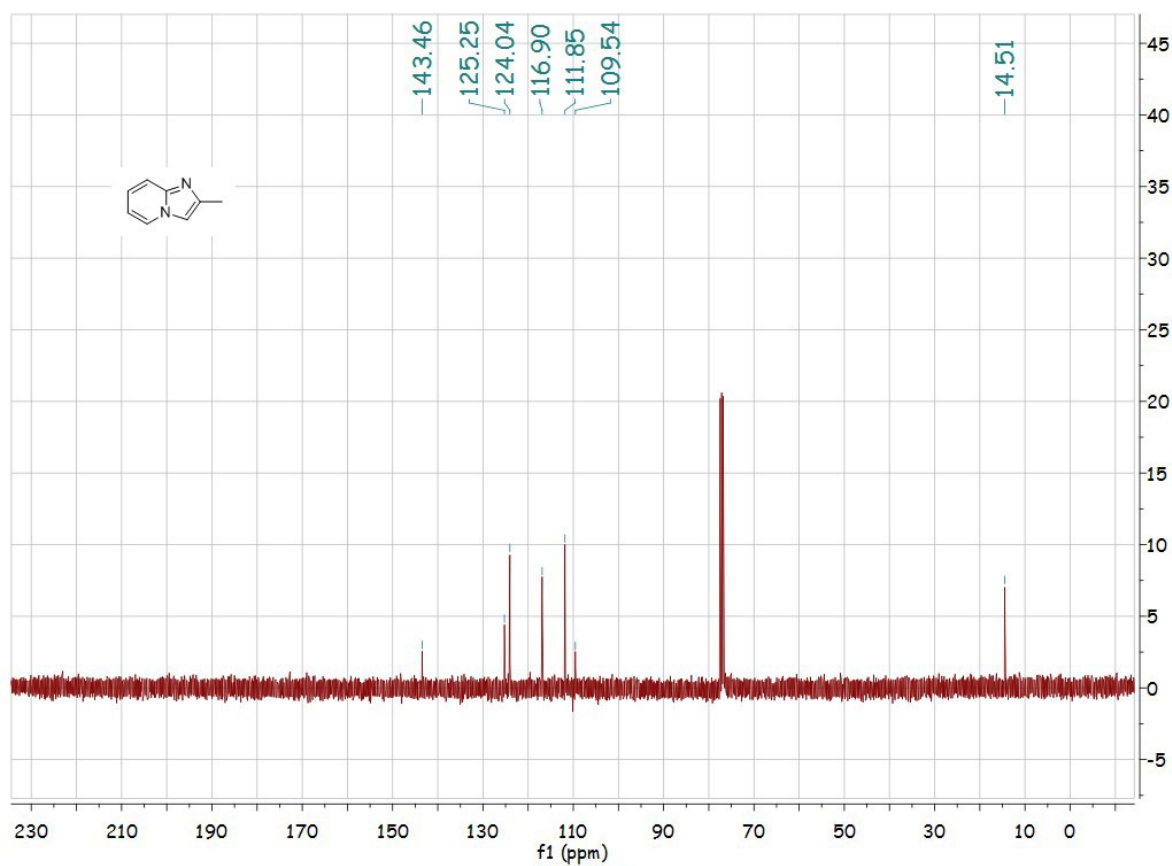

[3.28] <sup>1</sup>H and <sup>13</sup>C NMR of the 2-methylimidazo[1,2-a] pyridine of (3be)

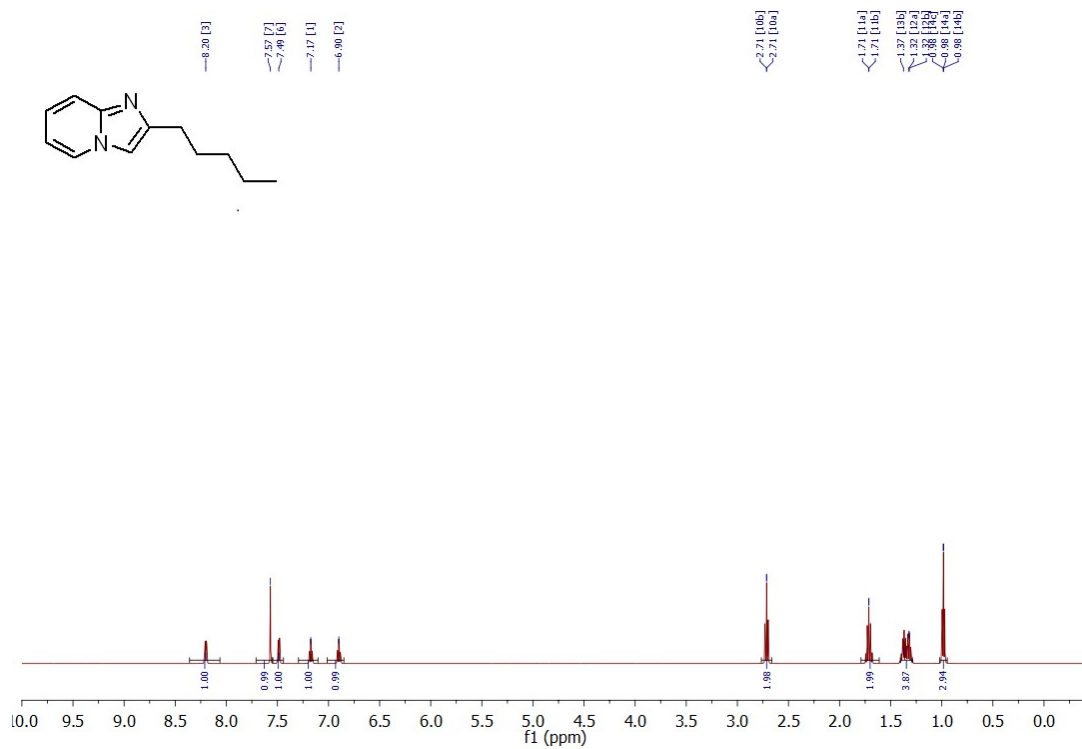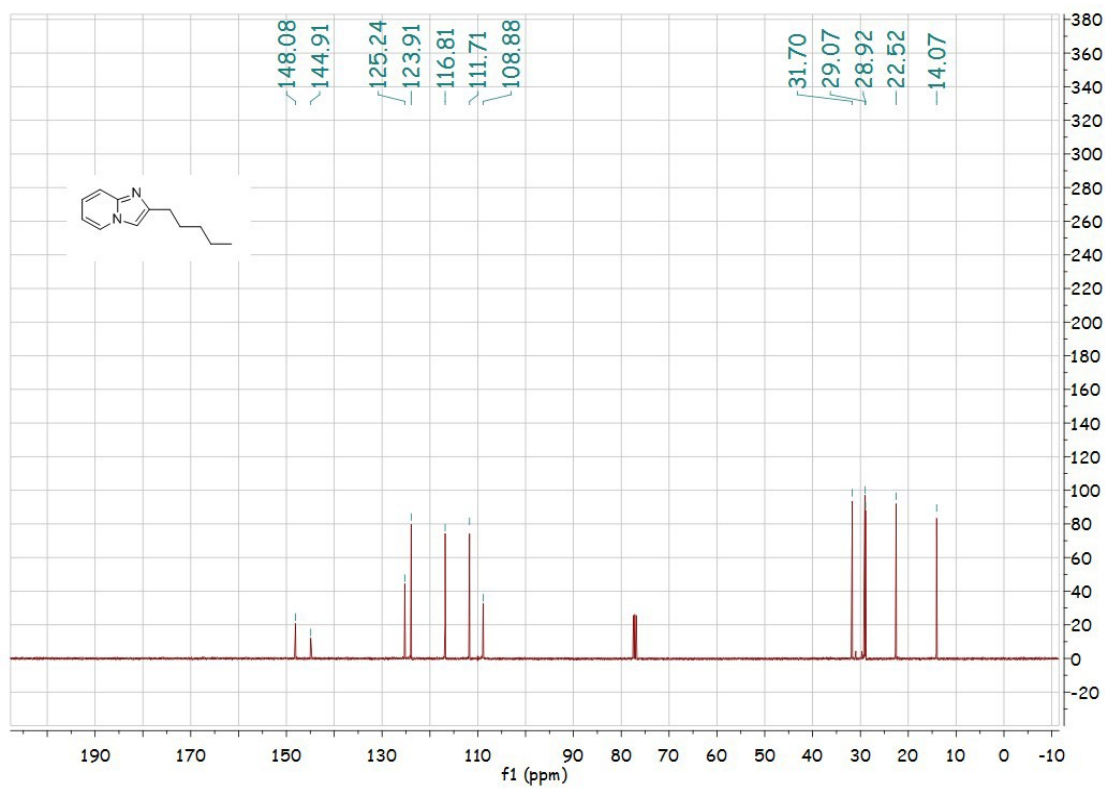

[3.29]  $^1\text{H}$  and  $^{13}\text{C}$  NMR of the 2-methylimidazo[1,2-a] pyridine of (3ce):

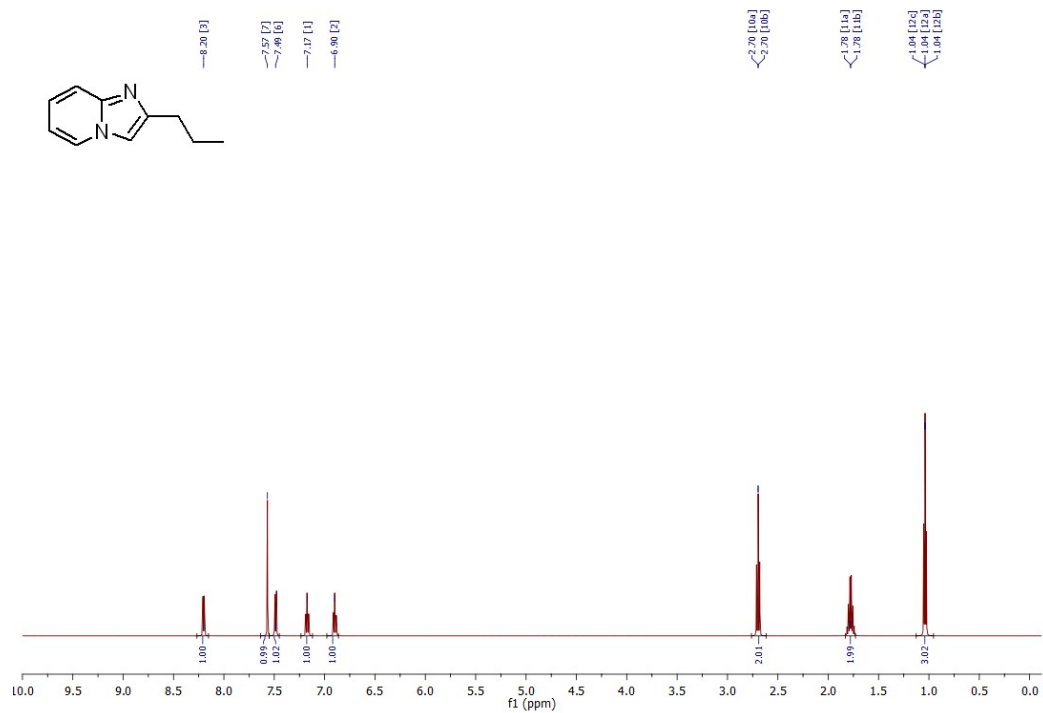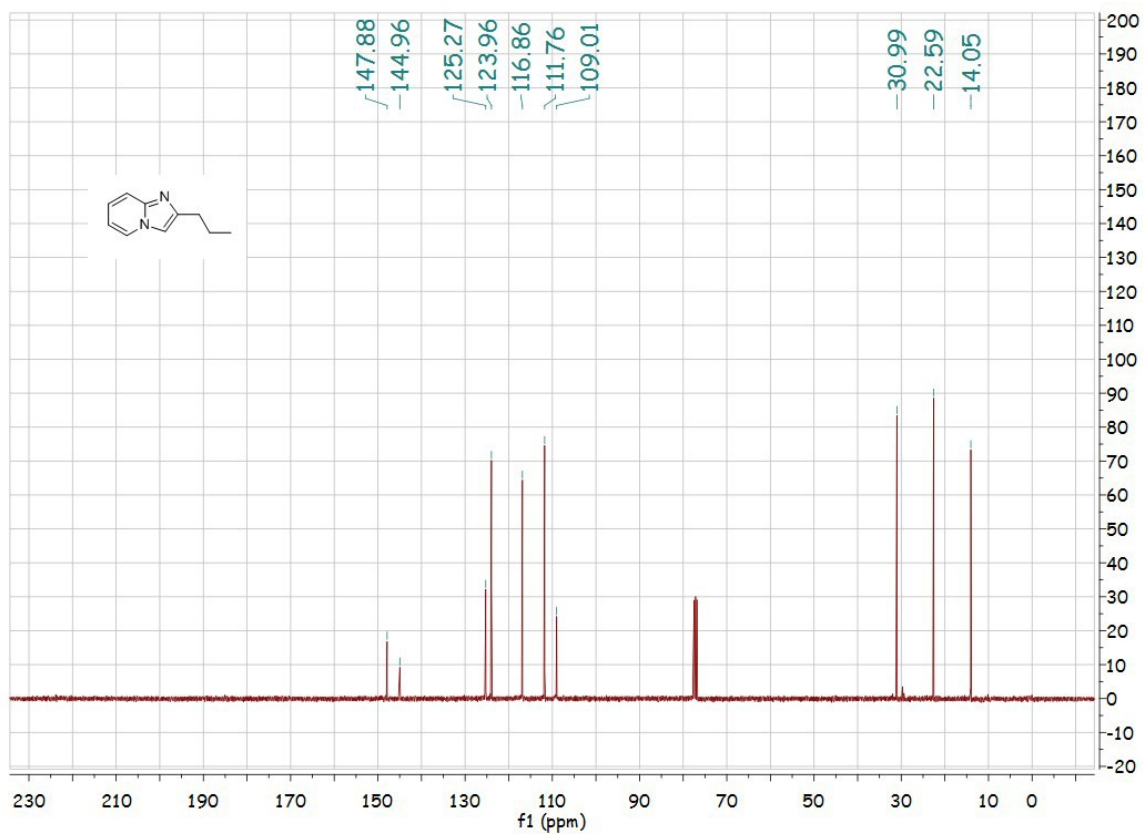

[3.29]  $^1\text{H}$  and  $^{13}\text{C}$ NMR of the 2-methylimidazo[1,2-a] pyridine of (3de)

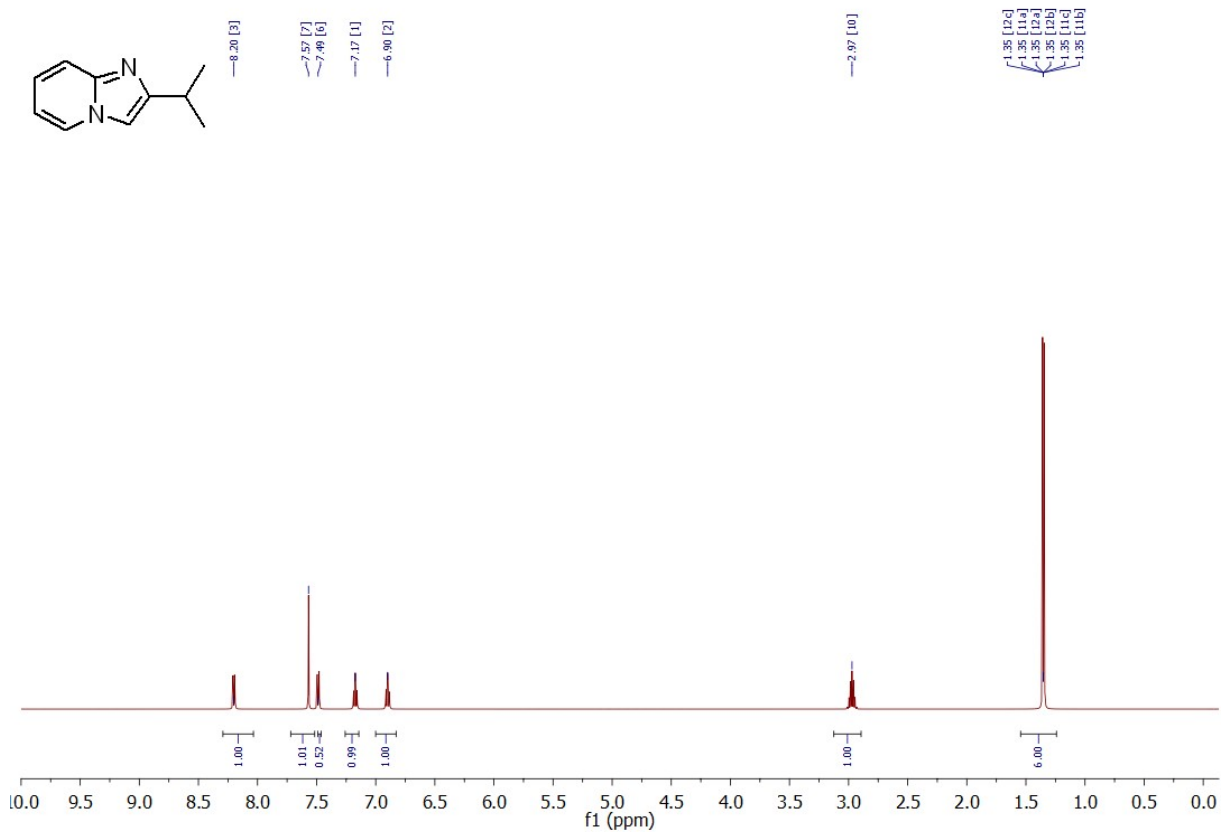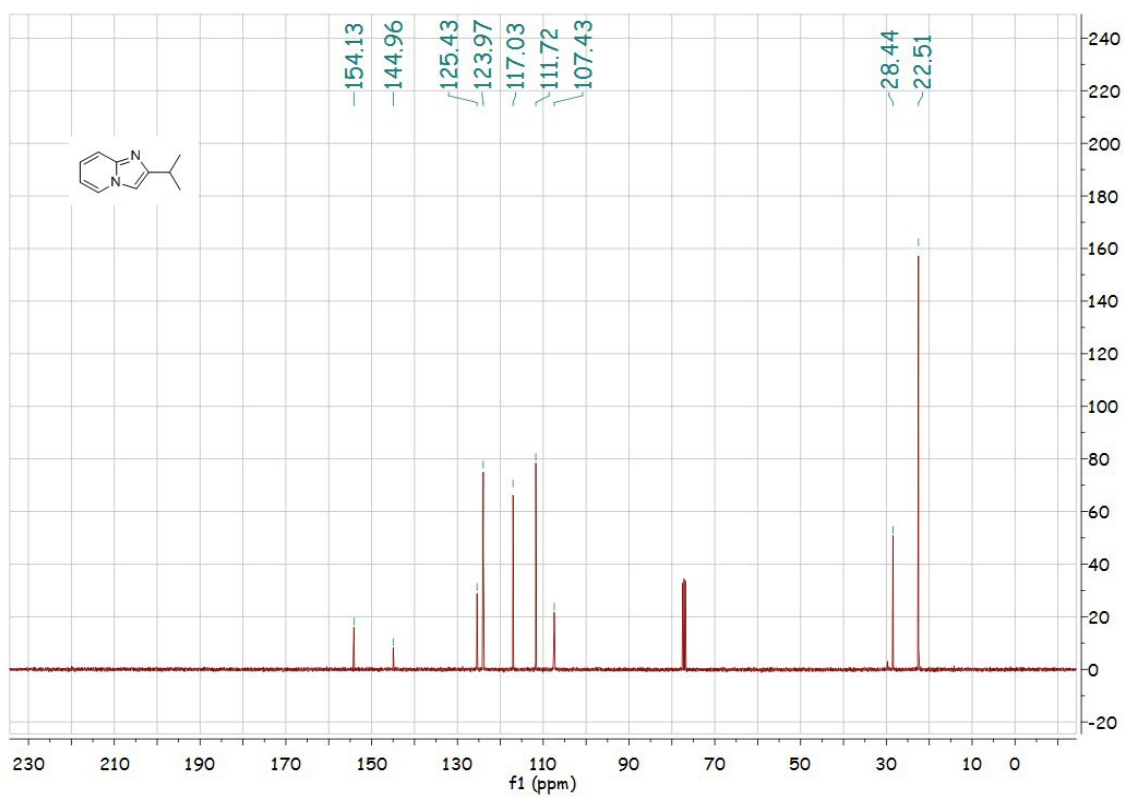

**[3.1] HRMS of 2-phenylimidazo[1,2-a] pyridine(3aa) :**



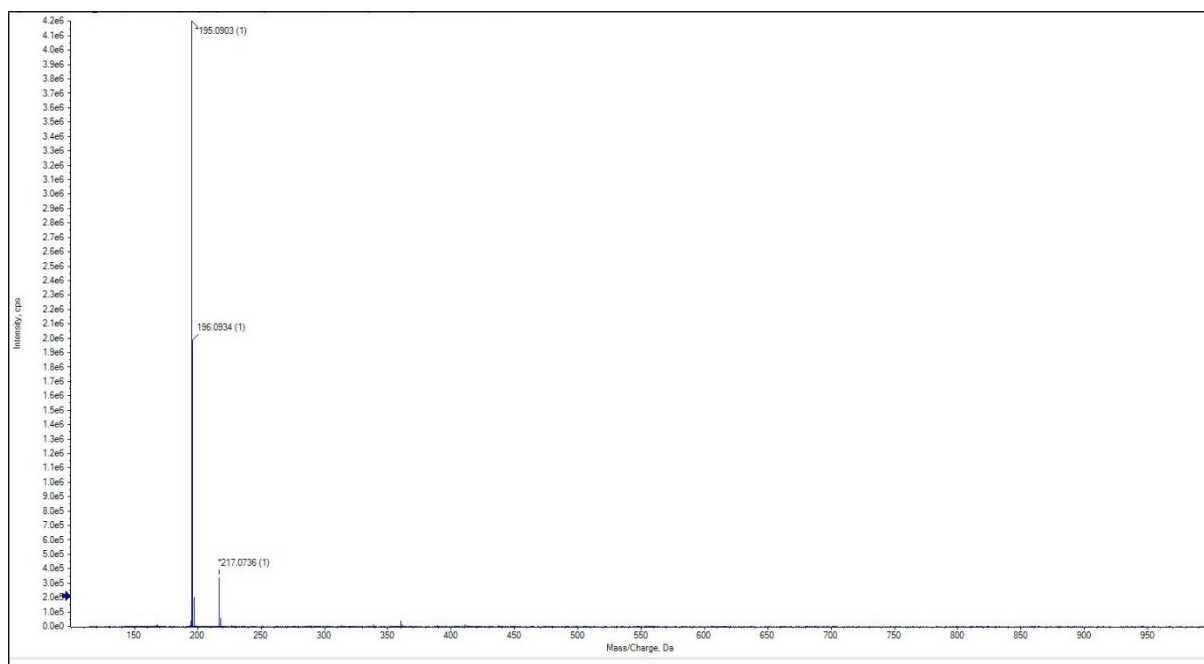

**[3.1] HRMS of the 2-(p-Tolyl)imidazo [1,2-a] pyridine (3ba) :**

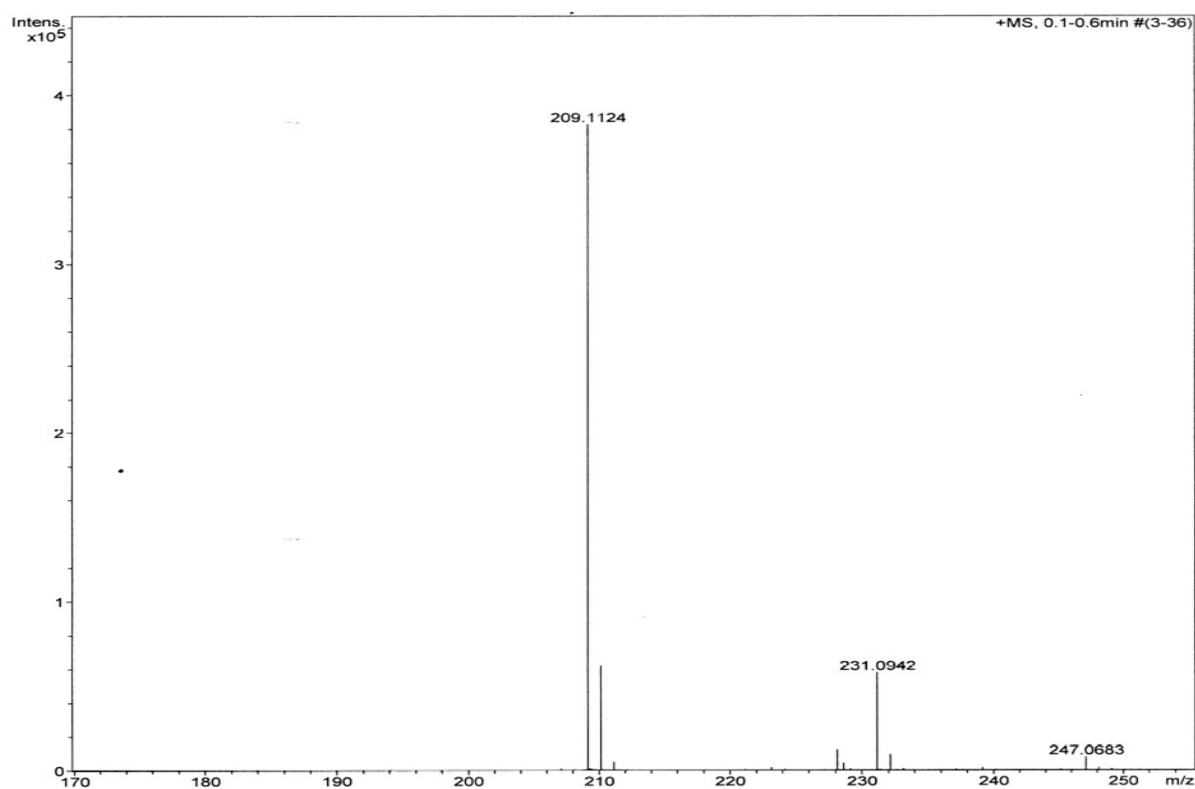

**[3.1] HRMS of the 2-(4-Bromophenyl)imidazo[1,2-a]pyridine (3fa)**

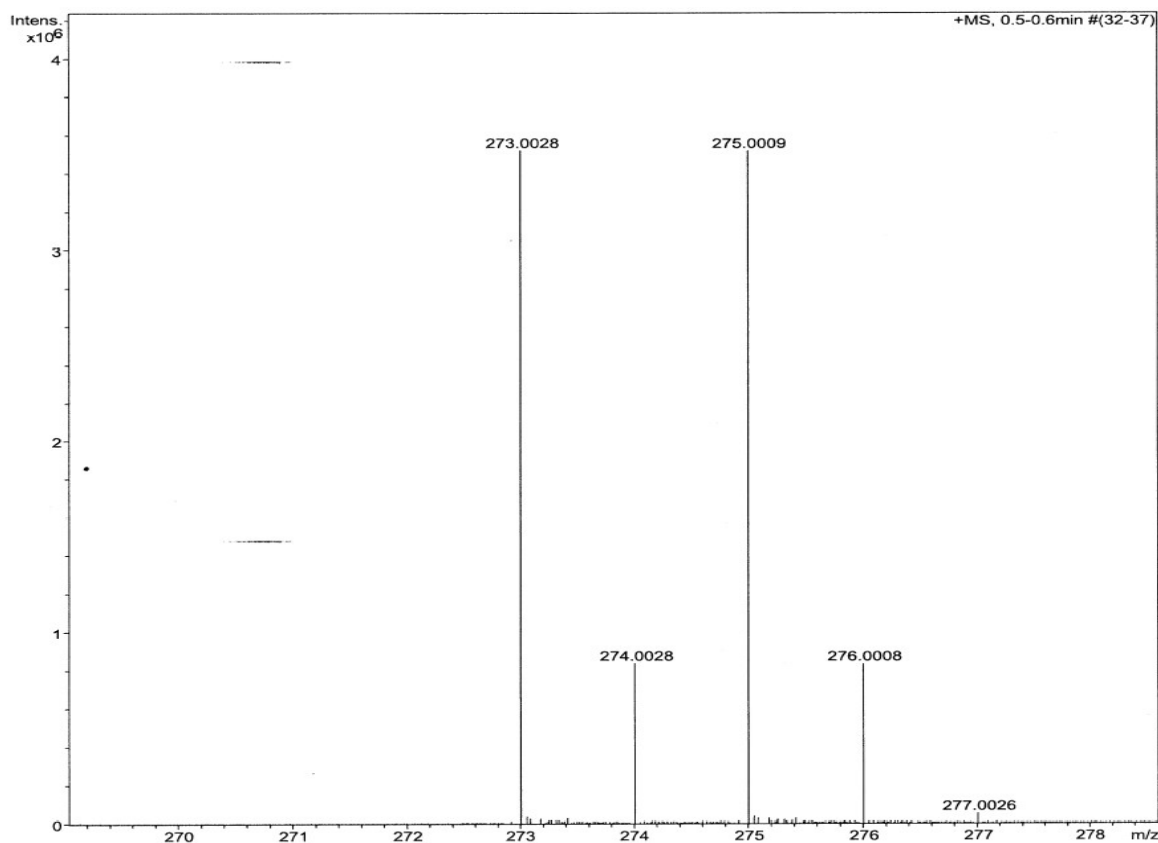

**I.R.Spectra:(3aa)**

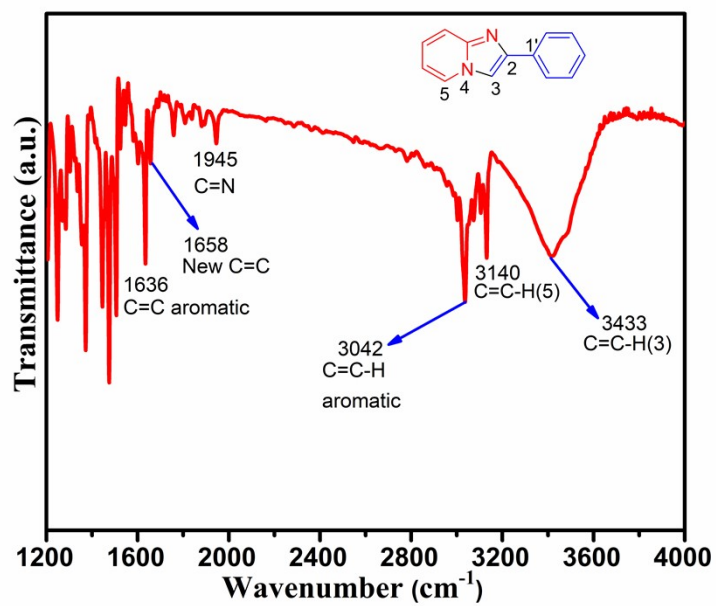

Supplement: d3ra07145f1.pdf [file d3ra07145f1.pdf]
